# Supplementary material
Source: Research Square preprint supplement (doi:10.21203/rs.3.rs-9456965/v1)
Supplement: Supplementary file 5 [file a9be6743d4bfb1731496e790.docx]

**Supplementary Data**

**Datasets used**

**AFSD**: We used the freely accessible AFSD [(Taschereau-Dumouchel et al., 2020)](https://www.zotero.org/google-docs/?broken=qTzutK), comprising 31 participants (15 women; mean age 21.5 ± 2.1 years). Participants were specifically selected based on high fear ratings (5-6 on a 6-point Likert scale) for at least one of 30 animal categories. Each participant completed 800 trials with brain data averaged within-subject by fear level. This dataset investigates schema-based fear through presentations of animal pictures to individuals with pre-existing animal fears.

**VIFD**: We analyzed the publicly available VIFD [(Zhou et al., 2021)](https://www.zotero.org/google-docs/?broken=ewQDKS) comprising 67 participants (34 women; mean age 23.29 ± 4.21 years). Participants completed 80 fear judgments each across four runs of 20 pictures, rating their fear on a 5-point Likert scale. Brain data were averaged within-subjects by fear level. We selected this dataset because it involves situational fear, likely involving more semantic knowledge, as participants were not selected for a specific fear and are thus unlikely to have schemas related to any particular category of images. This dataset features images across various categories (people, faces, animals, objects, and landscapes) from the International Affective Picture System (IAPS), the Nencki Affective Picture System (NAPS), and the Internet.

**CoFD**: Finally, we employed the Conditioned Fear Dataset (CoFD) [(Davignon et al., 2025)](https://www.zotero.org/google-docs/?broken=kkdvff), which included 175 participants (153 of whom were analyzed after exclusions; 118 women; mean age = 26.55 ± 3.12 years). This dataset assessed subjective fear via shock expectancy ratings following a classical conditioning paradigm in which three coloured lights (yellow, red, and blue) served as contextual cues, adapted from Milad et al. (2007). The paradigm consisted of two sessions conducted on consecutive days, both acquired using fMRI in Montreal, Canada. During each phase, participants viewed repeated presentations of conditioned (CS+) and non-conditioned (CS−) stimuli, with no shocks delivered during extinction or renewal. Shock expectancy ratings, measured on a 5-point Likert scale, were collected at the end of each session for the first and last presentations of each CS type, providing a subjective index of learned fear. In total, participants provided 16 fear judgments each.

**Table S1 : Distribution of the number of fear judgments by dataset.**

| **Number of Fear Judgments** | **AFSD (n)** | **VIFD (n)** | **CoFD (n)** |
| --- | --- | --- | --- |
| 1 | 0 | 0 | 1 |
| 2 | 0 | 0 | 23 |
| 3 | 2 | 0 | 45 |
| 4 | 2 | 2 | 57 |
| 5 | 13 | 65 | 24 |
| 6 | 14 | 0 | 0 |

Ratings of 3 were grouped with 4-5 ratings due to the lower frequency of 4-5 responses compared to 1-2 responses.

**Table S2 : Distribution of subjective values by dataset**

| **Fear Type** | **Subjective Value** | **AFSD (n)1** | **VIFD (n)1** | **CoFD (n)1** |
| --- | --- | --- | --- | --- |
| Low Fear | 0 | 28 | n/a | n/a |
| 1 | 29 | 67 | 144 |
| 2 | 29 | 67 | 93 |
| High Fear | 3 | 29 | 67 | 120 |
| 4 | 30 | 67 | 100 |
| 5 | 18 | 65 | 73 |

1 Fear judgments were averaged per participant.

**Table S3: Correlation of subjective fear judgments with brain activation according to each dataset with dataset reduction (n=31)**

| **Dataset** | **Pearson Correlation (r)** | **corrected p-value (*p*)** | **Area Under the Curve (AUC)** | **corrected p-value (*p*)** |
| --- | --- | --- | --- | --- |
| AFSD | 0.749* | < 0.001 | 0.880* | 0.002 |
| VIFD**†** | 0.545* | < 0.001 | 0.744* | 0.002 |
| CoFD**†** | 0.265* | 0.010 | 0.620* | 0.032 |
| AFSD(*VIFD*)**1†** | 0.122 | 0.147 | 0.571* | 0.081 |
| AFSD(*CoFD*)**1†** | 0.139 | 0.150 | 0.578* | 0.081 |
| VIFD(*AFSD*)**1†** | 0.645* | < 0.001 | 0.824* | 0.002 |
| VIFD(*CoFD*)**1†** | 0.248 | 0.014 | 0.615* | 0.032 |
| CoFD(*AFSD*)**1†** | 0.507* | < 0.001 | 0.719* | 0.002 |
| CoFD(*VIFD*)**1†** | 0.133 | 0.128 | 0.567 | 0.081 |

1 Cross-prediction to see if brain patterns learned in one model dataset can be generalized to another dataset, where “Model(*Data*)”. * = p < 0.05 after FDR correction. **†** = after reduction (n=31)

After downsampling VIFD and CoFD to match the AFSD sample size (n = 31), cross-prediction performance was substantially weakened, with most effects no longer reaching statistical significance. This pattern suggests that the larger sample sizes in VIFD and CoFD contributed to the robustness of the original cross-prediction results.

**Figure S1. Representational Dissimilarity Matrix (RDM) for each dataset**

**
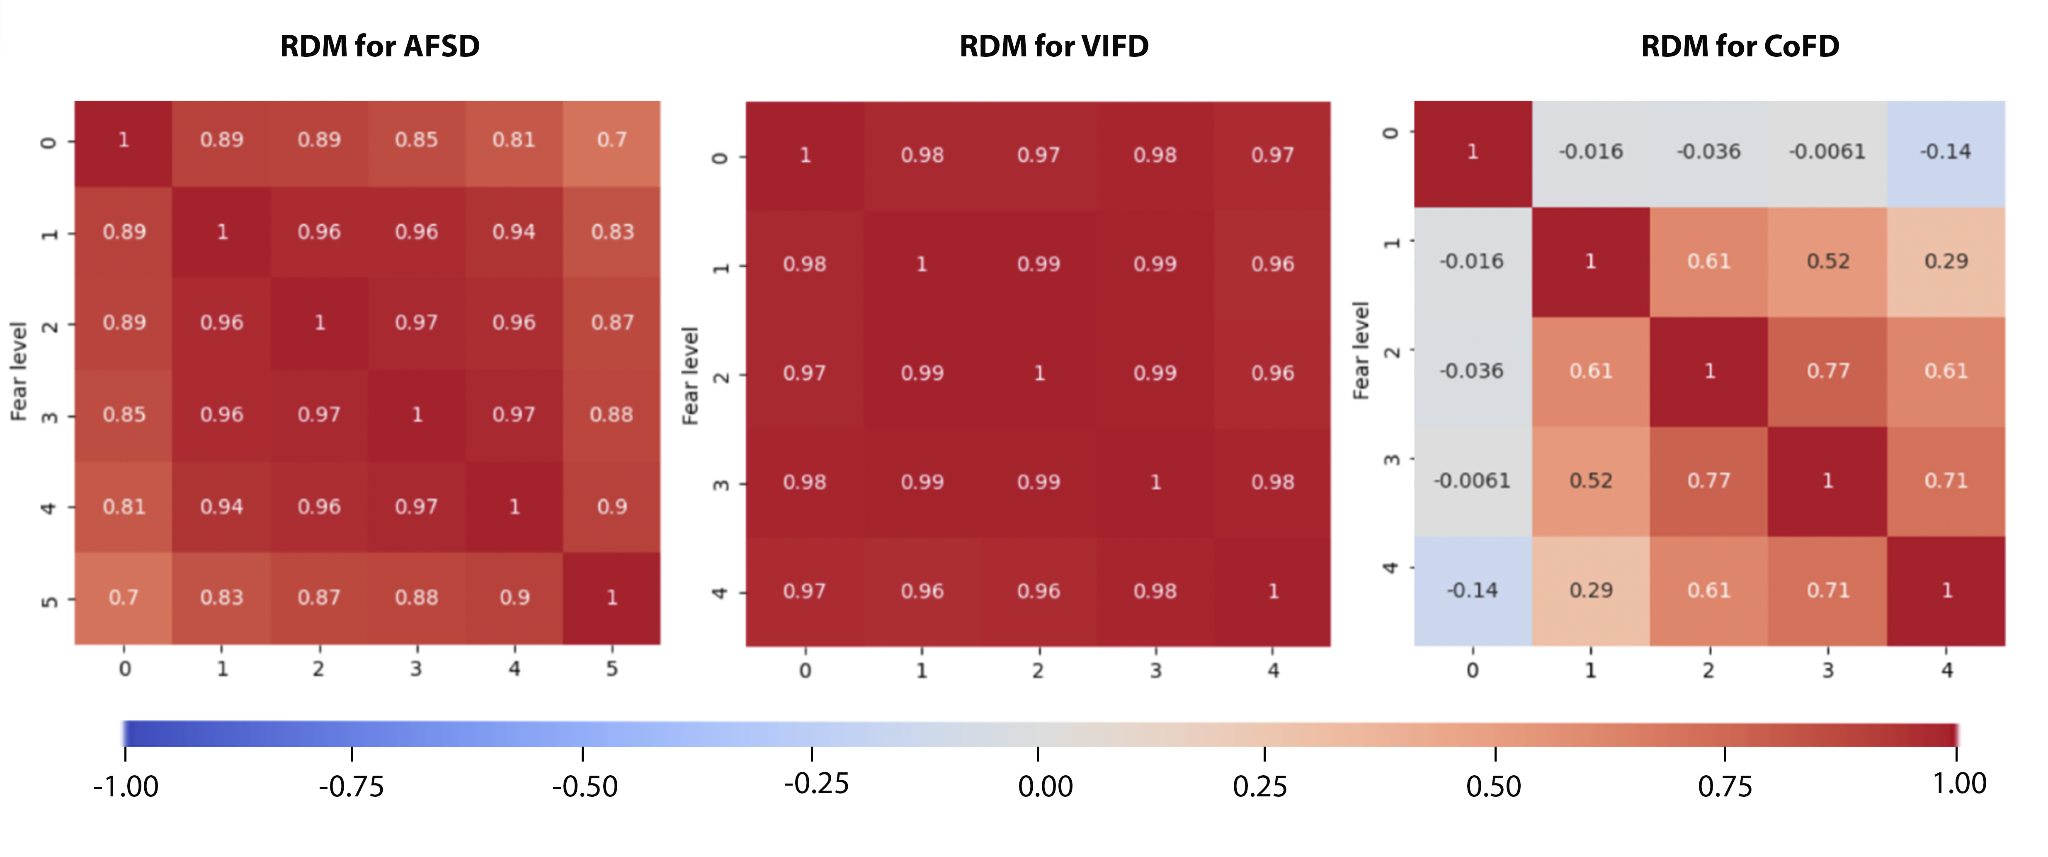
**

**Figure S2 : R brainmap for each dataset**


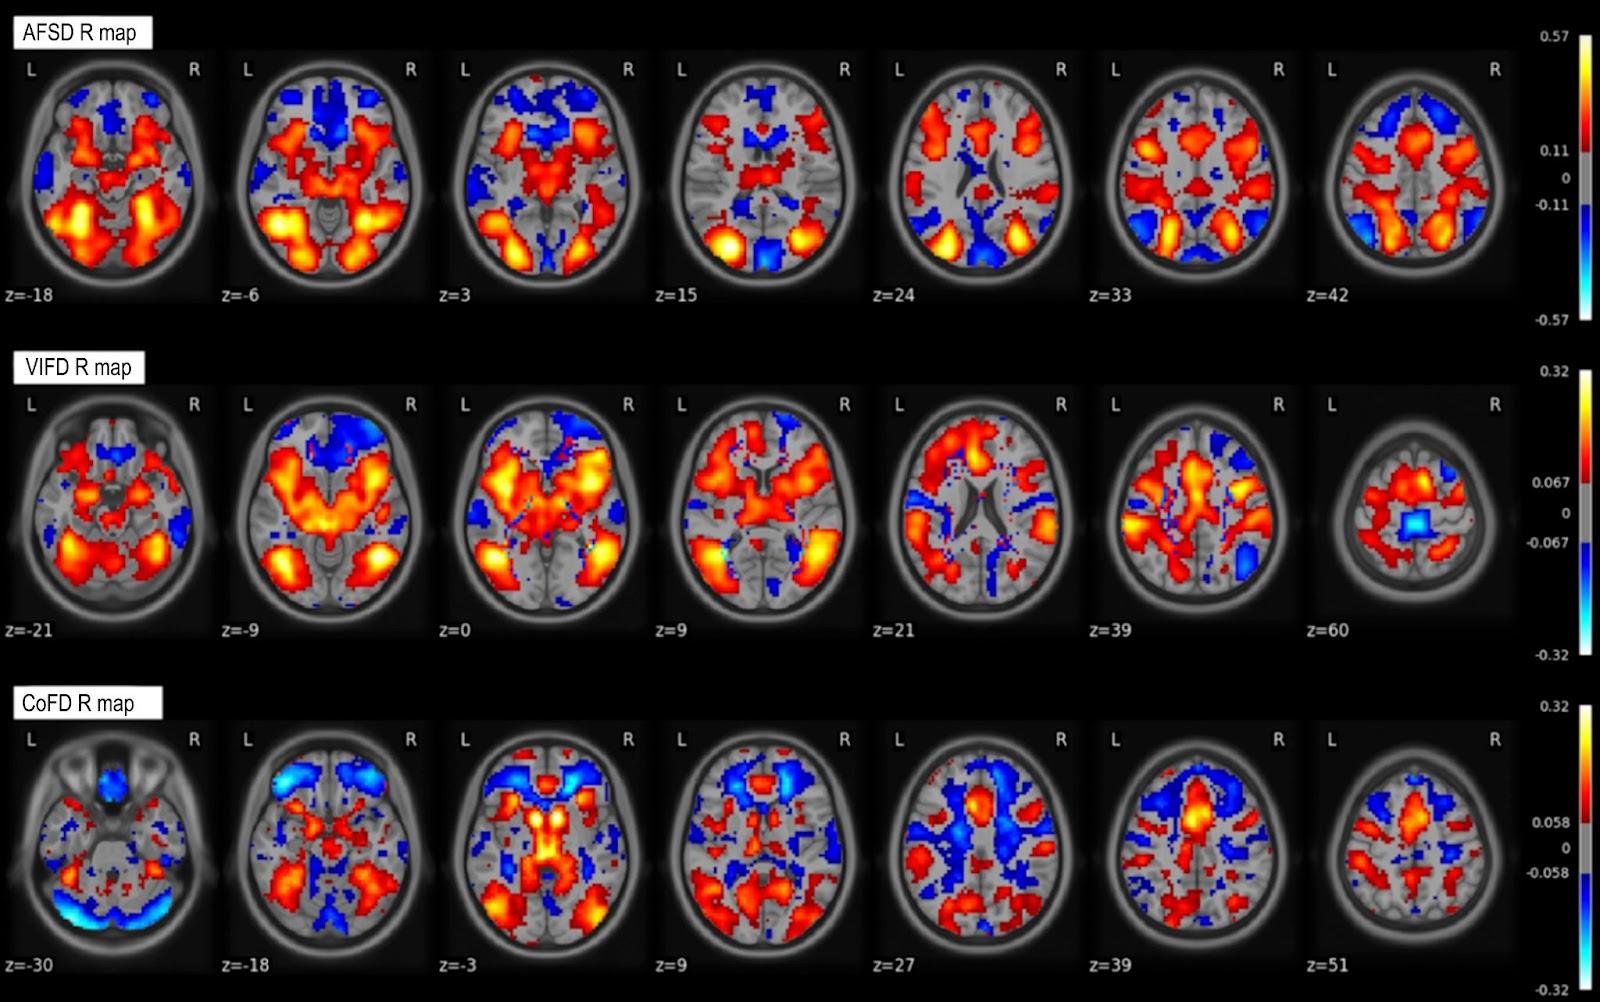


**Figure S3 : Z-value of each dataset for networks**


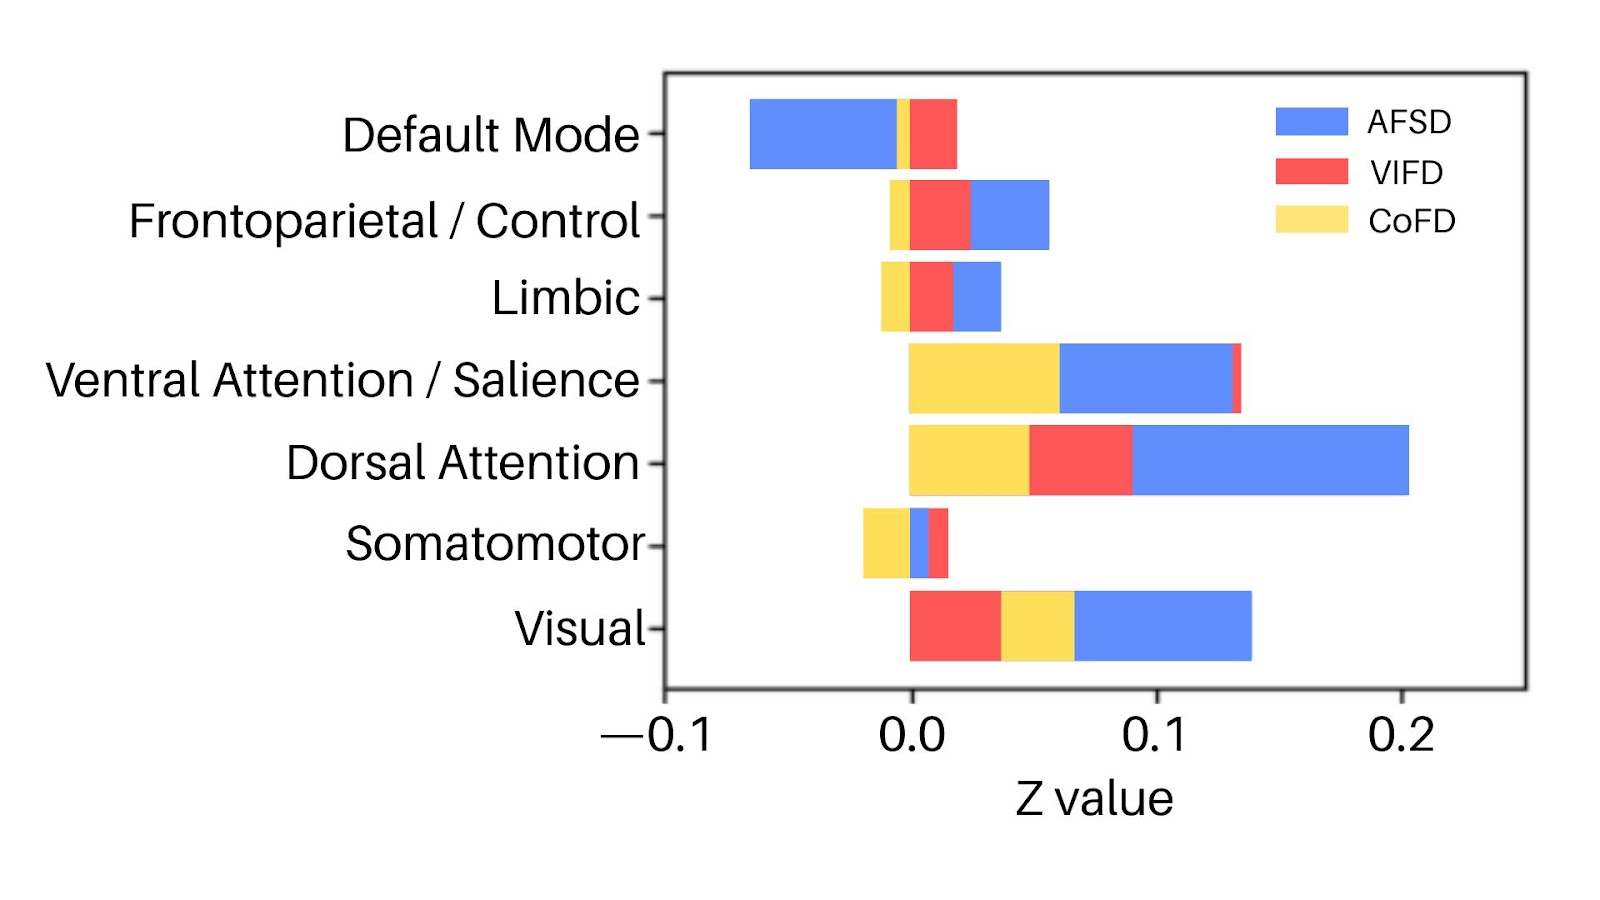


**Figure S4. Top 2% of r values by ROI (Normalized by max r value)**


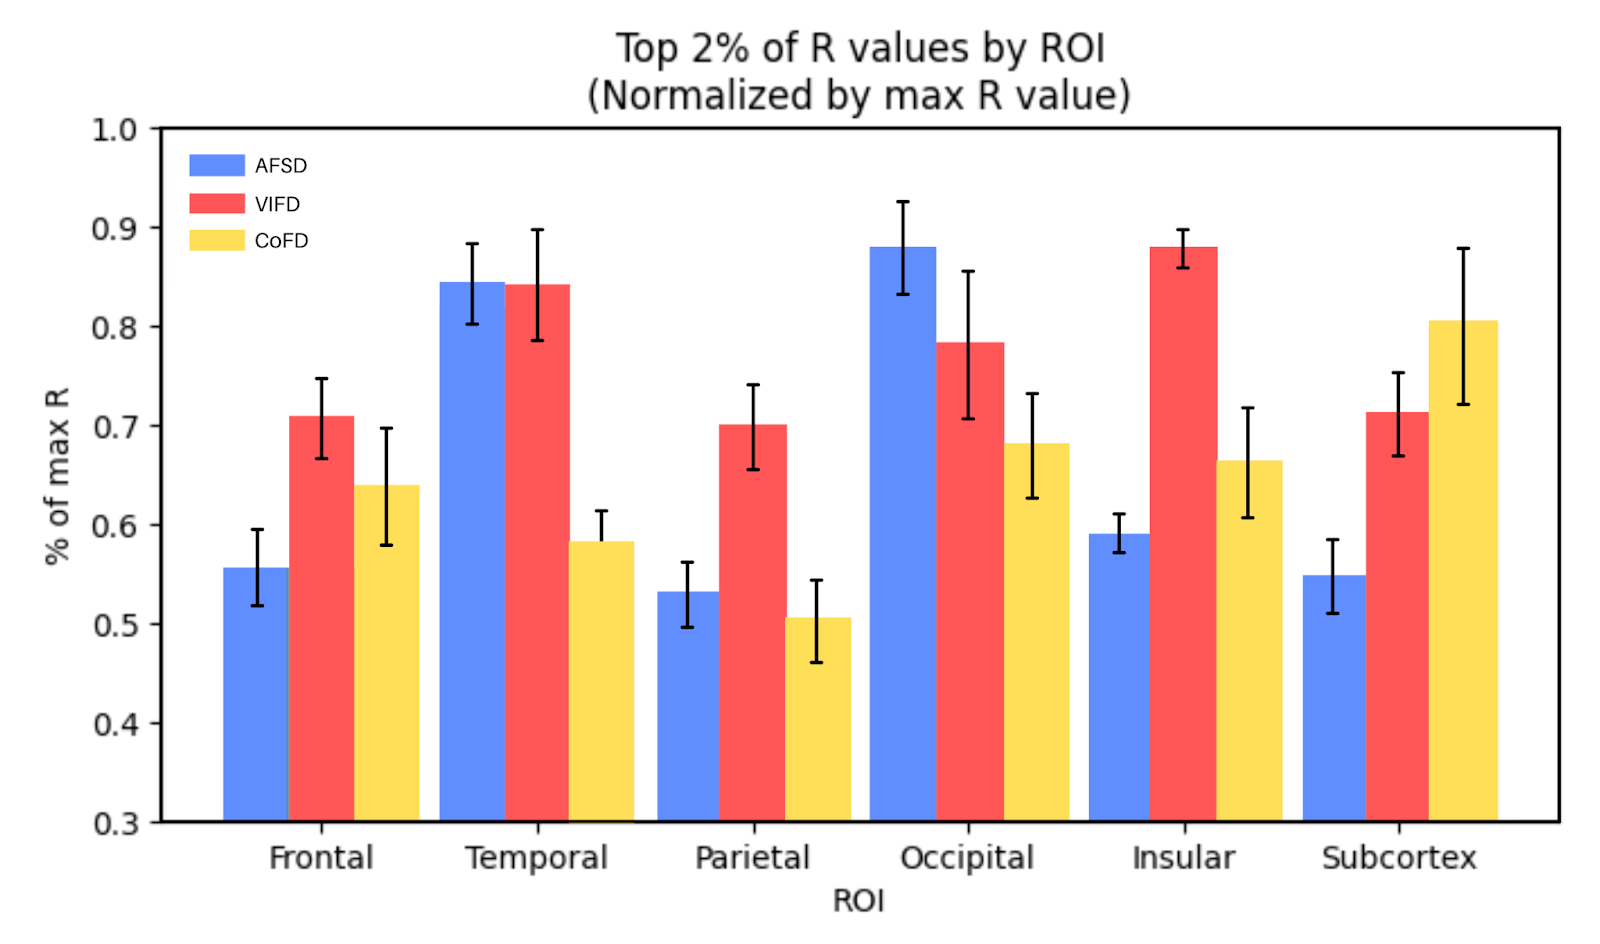


**Spatial distribution of fear-predictive regions**

These *r*-maps were further used to estimate the total amount of fear signal present in each brain region. Because Pearson correlation can be interpreted in terms of shared information (or shared variance, by taking the square), we approximated the amount of fear-related signal by estimating the mean and standard deviation of the top 2% of r-coefficients in each region of a coarse anatomically-based brain parcellation (derived by combining regions of the Harvard-Oxford atlas). These results are presented in Figure 7A. Furthermore, to ensure that the difference in signal was not driven by the amount of data available for each study, we recomputed the mean and standard deviation of the top 2% of r-coefficients across the whole brain for differently sized subsets of each dataset, starting at 30 observations and incrementing upwards. While the mean r-coefficients decreased slightly with the subset size in all datasets, the overall ranking remained consistent.

To further investigate the spatial distribution of fear-predictive regions, Figure 7A shows the top 2% of brain regions ranked by correlation strength (R values) for each dataset. AFSD showed the most extensive distribution of highly predictive regions, with peak activations in the occipital, temporal, insular and frontal regions. Furthermore, to assess the impact of dataset size on these findings, we examined the stability of the top 2% regions as a function of the number of data points per dataset. Figure 7B presents the top 2% of regions ranked by participant count, showing that AFSD exhibits a stronger signal than the other two datasets, even after matching for the number of data points.


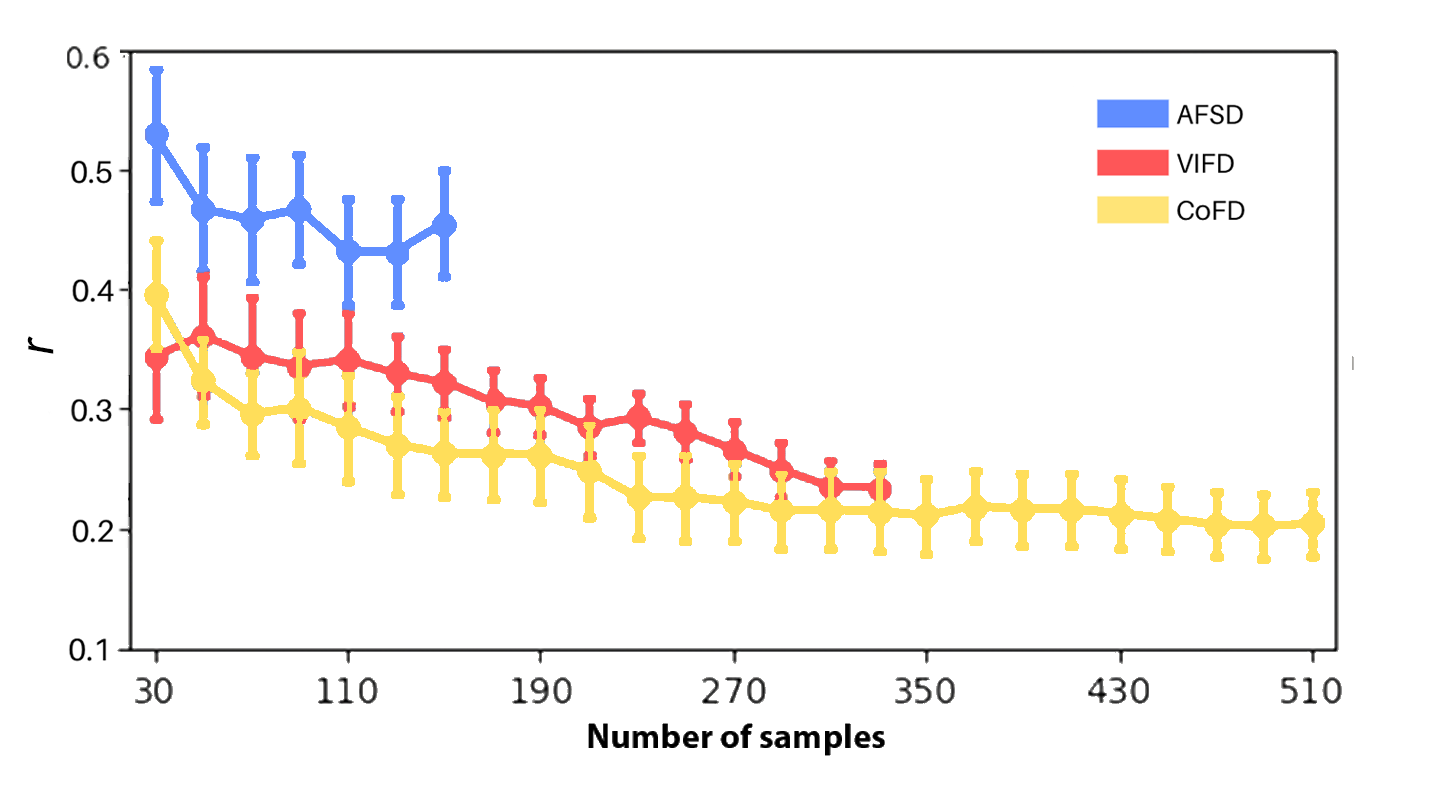


**Figure S5. AFSD demonstrates more robust and consistent neural representations.** Spatial distribution of the top 2% of brain regions most predictive of subjective fear, identified by their correlation strength (R values). Regions ranked by the consistency of their predictive power, measured as the number of participants for whom the region was among the most predictive. This analysis confirms that the AFSD neural decoder is not only stronger but also more consistently expressed across individuals than VIFD and CoFD.

**Table S4 : IRM Parameters**

| **Parameters** | **AFSD** | **VIFD** | **CoFD** | **Potential impact** |
| --- | --- | --- | --- | --- |
| **Scanner** | Siemens 3T Prisma, Siemens 3T Verio | GE Discovery MR750 3T | Siemens 3T MAGNETOM Prisma | - |
| **Séquence fonctionnelle** | EPI T2* | EPI T2* | Interleaved multiband sequence | - |
| **TR (ms)** | 2000 | 2000 | 867 | - |
| **TE (ms)** | 30 | 30 | 20 | - |
| **Voxel size (mm³)** | 3 × 3 × 3.5 | 3.125 × 3.125 × 3.8 | 3 x 3 x 3 | Slightly different |
| **FOV (mm)** | 192 × 192 | 200 × 200 | 220 x 220 | VIFD has a wider brain coverage |
| **Matrix size** | 64 × 64 | 64 × 64 | n/a |  |
| **Slice thickness (mm)** | 3.5 | 3.8 | 3 | Thinner thickness for AFSD |
| **Slice gap (mm)** | 0 | 0 | n/a | - |
| **Flip angle (°)** | 80 | 90 | 58 | Contrast BOLD slightly different |
| **Nombre de slice** | 33 | 36 | 51 | Brain coverage different |

**Regional specificity of fear prediction within each dataset**

Region-by-region analyses revealed distinct spatial patterns of predictive performance across the three datasets (Figure 5, Table S6). AFSD demonstrated the broadest cortical representation, with significant brain-behaviour correlations in 148 regions (r = 0.217–0.640, FDR-corrected p < 0.05), predominantly localized to posterior visual and temporal cortices (Figure 5B). The strongest correlations were observed in visual processing areas (left middle occipital gyrus: r = 0.640; left medial superior occipital gyrus: r = 0.573), temporal regions (left extreme lateroventral area 37 of the inferior temporal gyrus: r = 0.579), and limbic structures (right lateral amygdala: r = 0.576; left medial area 7 of the precuneus: r = 0.589).

VIFD showed more moderate but widespread correlations across 124 regions (r = 0.155–0.333), with a more distributed spatial pattern that emphasized prefrontal and limbic involvement (Figure 5C). Top predictive regions included prefrontal cortex (right medial area 9 of the superior frontal gyrus: r = 0.333), anterior cingulate (bilateral pregenual area 32: left r = 0.311, right r = 0.282), and temporal cortex (left extreme lateroventral area 37 of the inferior temporal gyrus: r = 0.305; bilateral auditory cortex TE1.0/TE1.2: left r = 0.301, right r = 0.262).

CoFD exhibited the most restricted pattern, with significant correlations in 47 regions (r = 0.136–0.288), concentrated in the medial frontal and limbic circuits (Figure 5D). Strongest correlations were found in medial frontal cortex (left medial area 6 of the superior frontal gyrus: r = 0.288), cingulate gyrus (right caudodorsal area 24: r = 0.261), orbitofrontal regions (right lateral area 10 of the middle frontal gyrus: r = 0.256; right lateral area 11 of the orbital gyrus: r = 0.257), and limbic structures (left ventral agranular insula: r = 0.236).

**Table S5. ROI Correlation for Each Dataset**

| **Lobe** | **Gyrus** | **Left and Right Hemisphere** | **Label ID.L** | **Label ID.R** | **Anatomical and modified Cyto-architectonic descriptions** | **lh.MNI(X,Y,Z)** | **rh.MNI(X,Y,Z)** | **AFSD (n=31)** | | **VIFD (n=67)** | | **CoFD (n=153)** | |
| --- | --- | --- | --- | --- | --- | --- | --- | --- | --- | --- | --- | --- | --- |
| r | p | r | p | r | p |
| Frontal Lobe | SFG, Superior Frontal Gyrus | SFG_L(R)_7_1 | 1 |  | *A8m, medial area 8* | -5 ,15, 54 | 7, 16, 54 | - | - | 0,182 | 0,001 | 0,199 | < 0.001 |
| SFG_L(R)_7_1 |  | 2 | *A8m, medial area 8* | -5 ,15, 54 | 7, 16, 54 | 0,283 | < 0.001 | 0,185 | 0,001 | 0,145 | 0,001 |
| SFG_L(R)_7_2 | 3 |  | *A8dl, dorsolateral area 8* | -18, 24, 53 | 22, 26, 51 | 0,275 | < 0.001 | - | - | - | - |
| SFG_L(R)_7_2 |  | 4 | *A8dl, dorsolateral area 8* |  |  | 0,401 | < 0.001 | - | - | - | - |
| SFG_L(R)_7_3 |  | 6 | *A9l, lateral area 9* | -11, 49, 40 | 13, 48, 40 | 0,270 | < 0.001 | 0,212 | < 0.001 | 0,155 | < 0.001 |
| SFG_L(R)_7_4 | 7 |  | *A6dl, dorsolateral area 6* | -18, -1, 65 | 20, 4, 64 | - | - | - | - | 0,140 | 0,001 |
| SFG_L(R)_7_4 |  | 8 | *A6dl, dorsolateral area 6* | -18, -1, 65 | 20, 4, 64 | - | - | 0,218 | < 0.001 | - | - |
| SFG_L(R)_7_5 | 9 |  | *A6m, medial area 6* | -6, -5, 58 | 7, -4, 60 | - | - | 0,186 | 0,001 | 0,288 | < 0.001 |
| SFG_L(R)_7_5 |  | 10 | *A6m, medial area 6* | -6, -5, 58 | 7, -4, 60 | 0,224 | 0,004 | - | - | - | - |
| SFG_L(R)_7_6 | 11 |  | *A9m,medial area 9* | -5, 36, 38 | 6, 38, 35 | 0,374 | < 0.001 | 0,255 | < 0.001 | - | - |
| SFG_L(R)_7_6 |  | 12 | *A9m,medial area 9* |  |  | 0,319 | < 0.001 | 0,333 | < 0.001 | - | - |
| SFG_L(R)_7_7 | 13 |  | *A10m, medial area 10* | -8, 56, 15 | 8, 58, 13 | 0,354 | < 0.001 | 0,162 | 0,003 | - | - |
| SFG_L(R)_7_7 |  | 14 | *A10m, medial area 10* | -8, 56, 15 | 8, 58, 13 | - | - | 0,198 | < 0.001 | - | - |
| MFG, Middle Frontal Gyrus | MFG_L(R)_7_1 |  | 16 | *A9/46d, dorsal area 9/46* | -27, 43, 31 | 30, 37, 36 | - | - | - | - | 0,147 | 0,001 |
| MFG_L(R)_7_2 | 17 |  | *IFJ, inferior frontal junction* | -42, 13, 36 | 42, 11, 39 | 0,460 | < 0.001 | - | - | - | - |
| MFG_L(R)_7_2 |  | 18 | *IFJ, inferior frontal junction* | -42, 13, 36 | 42, 11, 39 | - | - | 0,239 | < 0.001 | - | - |
| MFG_L(R)_7_3 |  | 20 | *A46, area 46* | -28, 56, 12 | 28, 55, 17 | - | - | 0,190 | < 0.001 | 0,209 | < 0.001 |
| MFG_L(R)_7_4 | 21 |  | *A9/46v, ventral area 9/46* | -41, 41, 16 | 42, 44, 14 | 0,388 | < 0.001 | - | - | - | - |
| MFG_L(R)_7_4 |  | 22 | *A9/46v, ventral area 9/46* | -41, 41, 16 | 42, 44, 14 | 0,435 | < 0.001 | - | - | - | - |
| MFG_L(R)_7_5 | 23 |  | *A8vl, ventrolateral area 8* | -33, 23, 45 | 42, 27, 39 | 0,336 | < 0.001 | - | - | - | - |
| MFG_L(R)_7_5 |  | 24 | *A8vl, ventrolateral area 8* | -33, 23, 45 | 42, 27, 39 | 0,386 | < 0.001 | 0,166 | 0,002 | - | - |
| MFG_L(R)_7_6 | 25 |  | *A6vl, ventrolateral area 6* | -32, 4, 55 | 34, 8, 54 | 0,364 | < 0.001 | - | - | - | - |
| MFG_L(R)_7_6 |  | 26 | *A6vl, ventrolateral area 6* | -32, 4, 55 | 34, 8, 54 | - | - | 0,181 | 0,001 | - | - |
| MFG_L(R)_7_7 | 27 |  | *A10l, lateral area10* | -26, 60, -6 | 25, 61, -4 | 0,355 | < 0.001 | - | - | - | - |
| MFG_L(R)_7_7 |  | 28 | *A10l, lateral area10* | -26, 60, -6 | 25, 61, -4 | 0,259 | 0,001 | - | - | 0,256 | < 0.001 |
| IFG, Inferior Frontal Gyrus | IFG_L(R)_6_1 | 29 |  | *A44d,dorsal area 44* | -46, 13, 24 | 45, 16, 25 | 0,291 | < 0.001 | - | - | - | - |
| IFG_L(R)_6_1 |  | 30 | *A44d,dorsal area 44* | -46, 13, 24 | 45, 16, 25 | 0,361 | < 0.001 | 0,227 | < 0.001 | - | - |
| IFG_L(R)_6_2 | 31 |  | *IFS, inferior frontal sulcus* | -47, 32, 14 | 48, 35, 13 | 0,426 | < 0.001 | - | - | - | - |
| IFG_L(R)_6_2 |  | 32 | *IFS, inferior frontal sulcus* | -47, 32, 14 | 48, 35, 13 | 0,284 | < 0.001 | 0,186 | 0,001 | - | - |
| IFG_L(R)_6_3 | 33 |  | *A45c, caudal area 45* | -53, 23, 11 | 54, 24, 12 | 0,269 | 0,001 | 0,159 | 0,004 | - | - |
| IFG_L(R)_6_3 |  | 34 | *A45c, caudal area 45* | -53, 23, 11 | 54, 24, 12 | - | - | 0,180 | 0,001 | - | - |
| IFG_L(R)_6_4 | 35 |  | *A45r, rostral area 45* | -49, 36, -3 | 51, 36, -1 | 0,230 | 0,003 | 0,210 | < 0.001 | 0,159 | < 0.001 |
| IFG_L(R)_6_4 |  | 36 | *A45r, rostral area 45* | -49, 36, -3 | 51, 36, -1 | 0,217 | 0,005 | 0,260 | < 0.001 | - | - |
| IFG_L(R)_6_5 | 37 |  | *A44op, opercular area 44* | -39, 23, 4 | 42, 22, 3 | 0,222 | 0,004 | 0,169 | 0,002 | - | - |
| IFG_L(R)_6_5 |  | 38 | *A44op, opercular area 44* | -39, 23, 4 | 42, 22, 3 | - | - | 0,251 | < 0.001 | - | - |
| IFG_L(R)_6_6 | 39 |  | *A44v, ventral area 44* | -52, 13, 6 | 54, 14, 11 | 0,232 | 0,003 | 0,160 | 0,003 | 0,153 | < 0.001 |
| OrG, Orbital Gyrus | OrG_L(R)_6_1 | 41 |  | *A14m, medial area 14* | -7, 54, -7 | 6, 47, -7 | - | - | 0,175 | 0,001 | - | - |
| OrG_L(R)_6_1 |  | 42 | *A14m, medial area 14* | -7, 54, -7 | 6, 47, -7 | - | - | 0,168 | 0,002 | 0,228 | < 0.001 |
| OrG_L(R)_6_2 | 43 |  | *A12/47o, orbital area 12/47* | -36, 33, -16 | 40, 39, -14 | - | - | - | - | 0,189 | < 0.001 |
| OrG_L(R)_6_2 |  | 44 | *A12/47o, orbital area 12/47* | -36, 33, -16 | 40, 39, -14 | 0,368 | < 0.001 | 0,253 | < 0.001 | - | - |
| OrG_L(R)_6_3 | 45 |  | *A11l, lateral area 11* | -23, 38, -18 | 23, 36, -18 | 0,301 | < 0.001 | - | - | 0,230 | < 0.001 |
| OrG_L(R)_6_3 |  | 46 | *A11l, lateral area 11* | -23, 38, -18 | 23, 36, -18 | 0,322 | < 0.001 | 0,228 | < 0.001 | 0,257 | < 0.001 |
| OrG_L(R)_6_4 | 47 | 48 | *A11m, medial area 11* | -6, 52, -19 | 6, 57, -16 | - | - | - | - | - | - |
| OrG_L(R)_6_5 | 49 |  | *A13, area 13* | -10, 18, -19 | 9, 20, -19 | 0,462 | < 0.001 | 0,227 | < 0.001 | - | - |
| OrG_L(R)_6_5 |  | 50 | *A13, area 13* | -10, 18, -19 | 9, 20, -19 | 0,312 | < 0.001 | 0,169 | 0,002 | - | - |
| OrG_L(R)_6_6 | 51 |  | *A12/47l, lateral area 12/47* | -41, 32, -9 | 42, 31, -9 | 0,239 | 0,002 | - | - | 0,140 | 0,001 |
| OrG_L(R)_6_6 |  | 52 | *A12/47l, lateral area 12/47* | -41, 32, -9 | 42, 31, -9 | 0,343 | < 0.001 | 0,263 | < 0.001 | 0,204 | < 0.001 |
| PrG, Precentral Gyrus | PrG_L(R)_6_1 | 53 |  | *A4hf, area 4(head and face region)* | -49, -8, 39 | 55, -2, 33 | 0,276 | < 0.001 | 0,208 | < 0.001 | - | - |
| PrG_L(R)_6_2 | 55 |  | *A6cdl, caudal dorsolateral area 6* | -32, -9, 58 | 33, -7, 57 | - | - | 0,200 | < 0.001 | 0,150 | 0,001 |
| PrG_L(R)_6_2 |  | 56 | *A6cdl, caudal dorsolateral area 6* | -32, -9, 58 | 33, -7, 57 | - | - | 0,213 | < 0.001 | - | - |
| PrG_L(R)_6_3 | 57 |  | *A4ul, area 4(upper limb region)* | -26, -25, 63 | 34, -19, 59 | 0,274 | < 0.001 | 0,196 | < 0.001 | - | - |
| PrG_L(R)_6_4 | 59 |  | *A4t, area 4(trunk region)* | -13, -20, 73 | 15, -22, 71 | 0,252 | 0,001 | 0,160 | 0,003 | - | - |
| PrG_L(R)_6_4 |  | 60 | *A4t, area 4(trunk region)* | -13, -20, 73 | 15, -22, 71 | - | - | 0,182 | 0,001 | 0,146 | 0,001 |
| PrG_L(R)_6_5 | 61 |  | *A4tl, area 4(tongue and larynx region)* | -52, 0, 8 | 54, 4, 9 | 0,256 | 0,001 | - | - | - | - |
| PrG_L(R)_6_6 | 63 |  | *A6cvl, caudal ventrolateral area 6* | -49, 5, 30 | 51, 7, 30 | - | - | 0,188 | 0,001 | 0,160 | < 0.001 |
|  | PrG_L(R)_6_6 |  | 64 | *A6cvl, caudal ventrolateral area 6* | -49, 5, 30 | 51, 7, 30 | - | - | 0,281 | < 0.001 | - | - |
| PCL, Paracentral Lobule | PCL_L(R)_2_1 | 65 |  | *A1/2/3ll, area1/2/3 (lower limb region)* | -8, -38, 58 | 10, -34, 54 | - | - | 0,225 | < 0.001 | - | - |
| PCL_L(R)_2_1 |  | 66 | *A1/2/3ll, area1/2/3 (lower limb region)* | -8, -38, 58 | 10, -34, 54 | 0,255 | 0,001 | 0,205 | < 0.001 | 0,178 | < 0.001 |
| PCL_L(R)_2_2 | 67 |  | *A4ll, area 4, (lower limb region)* | -4, -23, 61 | 5, -21, 61 | - | - | 0,266 | < 0.001 | 0,201 | < 0.001 |
| PCL_L(R)_2_2 |  | 68 | *A4ll, area 4, (lower limb region)* | -4, -23, 61 | 5, -21, 61 | 0,315 | < 0.001 | 0,194 | < 0.001 | - | - |
| Temporal Lobe | STG, Superior Temporal Gyrus | STG_L(R)_6_1 |  | 70 | *A38m, medial area 38* | -32, 14, -34 | 31, 15, -34 | 0,229 | 0,003 | - | - | - | - |
| STG_L(R)_6_2 |  | 72 | *A41/42, area 41/42* | -54, -32, 12 | 54, -24, 11 | 0,249 | 0,001 | 0,217 | < 0.001 | - | - |
| STG_L(R)_6_3 | 73 |  | *TE1.0 and TE1.2* | -50, -11, 1 | 51, -4, -1 | 0,300 | < 0.001 | 0,301 | < 0.001 | - | - |
| STG_L(R)_6_3 |  | 74 | *TE1.0 and TE1.2* | -50, -11, 1 | 51, -4, -1 | 0,336 | < 0.001 | 0,262 | < 0.001 | - | - |
| STG_L(R)_6_4 | 75 |  | *A22c, caudal area 22* | -62, -33, 7 | 66, -20, 6 | 0,258 | 0,001 | 0,275 | < 0.001 | - | - |
| STG_L(R)_6_4 |  | 76 | *A22c, caudal area 22* | -62, -33, 7 | 66, -20, 6 | 0,254 | 0,001 | - | - | - | - |
| STG_L(R)_6_5 | 77 |  | *A38l, lateral area 38* | -45, 11, -20 | 47, 12, -20 | 0,239 | 0,002 | 0,175 | 0,001 | - | - |
| STG_L(R)_6_5 |  | 78 | *A38l, lateral area 38* | -45, 11, -20 | 47, 12, -20 | 0,225 | 0,004 | - | - | - | - |
| STG_L(R)_6_6 | 79 |  | *A22r, rostral area 22* | -55, -3, -10 | 56, -12, -5 | 0,360 | < 0.001 | 0,176 | 0,001 | - | - |
| STG_L(R)_6_6 |  | 80 | *A22r, rostral area 22* | -55, -3, -10 | 56, -12, -5 | 0,233 | 0,003 | 0,246 | < 0.001 | - | - |
| MTG, Middle Temporal Gyrus | MTG_L(R)_4_1 | 81 |  | *A21c, caudal area 21* | -65, -30, -12 | 65, -29, -13 | 0,420 | < 0.001 | - | - | - | - |
| MTG_L(R)_4_1 |  | 82 | *A21c, caudal area 21* | -65, -30, -12 | 65, -29, -13 | 0,216 | 0,006 | 0,288 | < 0.001 | - | - |
| MTG_L(R)_4_2 | 83 |  | *A21r, rostral area 21* | -53, 2, -30 | 51, 6, -32 | 0,240 | 0,002 | - | - | - | - |
| MTG_L(R)_4_3 | 85 |  | *A37dl, dorsolateral area37* | -59, -58, 4 | 60, -53, 3 | 0,532 | < 0.001 | 0,275 | < 0.001 | - | - |
| MTG_L(R)_4_3 |  | 86 | *A37dl, dorsolateral area37* | -59, -58, 4 | 60, -53, 3 | 0,445 | < 0.001 | 0,290 | < 0.001 | - | - |
| MTG_L(R)_4_4 | 87 |  | *aSTS, anterior superior temporal sulcus* | -58, -20, -9 | 58, -16, -10 | 0,231 | 0,003 | - | - | - | - |
|  | MTG_L(R)_4_4 |  | 88 | *aSTS, anterior superior temporal sulcus* | -58, -20, -9 | 58, -16, -10 | 0,219 | 0,005 | 0,207 | < 0.001 | - | - |
| ITG, Inferior Temporal Gyrus | ITG_L(R)_7_1 | 89 |  | *A20iv, intermediate ventral area 20* | -45, -26, -27 | 46, -14, -33 | 0,422 | < 0.001 | - | - | - | - |
| ITG_L(R)_7_1 |  | 90 | *A20iv, intermediate ventral area 20* | -45, -26, -27 | 46, -14, -33 | - | - | - | - | 0,184 | < 0.001 |
| ITG_L(R)_7_2 | 91 |  | *A37elv, extreme lateroventral area37* | -51, -57, -15 | 53, -52, -18 | 0,579 | < 0.001 | 0,305 | < 0.001 | - | - |
| ITG_L(R)_7_2 |  | 92 | *A37elv, extreme lateroventral area37* | -51, -57, -15 | 53, -52, -18 | - | - | 0,289 | < 0.001 | - | - |
| ITG_L(R)_7_3 |  | 94 | *A20r, rostral area 20* | -43, -2, -41 | 40, 0, -43 | 0,217 | 0,005 | - | - | - | - |
| ITG_L(R)_7_4 | 97 |  | *A20il, intermediate lateral area 20* | -56, -16, -28 | 55, -11, -32 | 0,406 | < 0.001 | 0,275 | < 0.001 | - | - |
| ITG_L(R)_7_5 |  | 98 | *A37vl, ventrolateral area 37* | -55, -60, -6 | 54, -57, -8 | 0,264 | 0,001 | 0,266 | < 0.001 | - | - |
| ITG_L(R)_7_6 | 99 |  | *A20cl, caudolateral of area 20* | -59, -42, -16 | 61, -40, -17 | 0,499 | < 0.001 | 0,198 | < 0.001 | - | - |
| ITG_L(R)_7_6 |  | 100 | *A20cl, caudolateral of area 20* | -59, -42, -16 | 61, -40, -17 | 0,292 | < 0.001 | 0,237 | < 0.001 |  |  |
| ITG_L(R)_7_7 | 101 |  | *A20cv, caudoventral of area 20* | -55, -31, -27 | 54, -31, -26 | 0,342 | < 0.001 | 0,233 | < 0.001 | 0,181 | < 0.001 |
|  | ITG_L(R)_7_7 |  | 102 | *A20cv, caudoventral of area 20* | -55, -31, -27 | 54, -31, -26 | - | - | - | - | 0,136 | 0,002 |
| FuG, Fusiform Gyrus | FuG_L(R)_3_1 | 103 |  | *A20rv, rostroventral area 20* | -33, -16, -32 | 33, -15, -34 | 0,590 | < 0.001 | - | - | - | - |
| FuG_L(R)_3_1 |  | 104 | *A20rv, rostroventral area 20* | -33, -16, -32 | 33, -15, -34 | 0,418 | < 0.001 | 0,179 | 0,001 | - | - |
| FuG_L(R)_3_2 | 105 |  | *A37mv, medioventral area37* | -31, -64, -14 | 31, -62, -14 | 0,500 | < 0.001 | - | - | - | - |
| FuG_L(R)_3_2 |  | 106 | *A37mv, medioventral area37* | -31, -64, -14 | 31, -62, -14 | 0,516 | < 0.001 | 0,215 | < 0.001 | 0,170 | < 0.001 |
| FuG_L(R)_3_3 | 107 |  | *A37lv, lateroventral area37* | -42, -51, -17 | 43, -49, -19 | 0,542 | < 0.001 | 0,241 | < 0.001 | - | - |
| FuG_L(R)_3_3 |  | 108 | *A37lv, lateroventral area37* | -42, -51, -17 | 43, -49, -19 | 0,337 | < 0.001 | 0,287 | < 0.001 | 0,166 | < 0.001 |
| PhG, Parahippocampal Gyrus | PhG_L(R)_6_1 |  | 110 | *A35/36r, rostral area 35/36* | -27, -7, -34 | 28, -8, -33 | 0,230 | 0,003 | - | - | - | - |
| PhG_L(R)_6_2 | 111 |  | *A35/36c, caudal area 35/36* | -25, -25, -26 | 26, -23, -27 | 0,242 | 0,002 | - | - | - | - |
| PhG_L(R)_6_2 |  | 112 | *A35/36c, caudal area 35/36* | -25, -25, -26 | 26, -23, -27 | 0,490 | < 0.001 | - | - | - | - |
| PhG_L(R)_6_3 | 113 |  | *TL, area TL (lateral PPHC, posterior parahippocampal gyrus)* | -28, -32, -18 | 30, -30, -18 | 0,443 | < 0.001 | 0,220 | < 0.001 | 0,192 | < 0.001 |
| PhG_L(R)_6_3 |  | 114 | *TL, area TL (lateral PPHC, posterior parahippocampal gyrus)* | -28, -32, -18 | 30, -30, -18 | 0,445 | < 0.001 | 0,220 | < 0.001 | - | - |
| PhG_L(R)_6_4 |  | 116 | *A28/34, area 28/34 (EC, entorhinal cortex)* | -19, -12, -30 | 19, -10, -30 | - | - | 0,174 | 0,001 | - | - |
| PhG_L(R)_6_5 | 117 |  | *TI, area TI(temporal agranular insular cortex)* | -23, 2, -32 | 22, 1, -36 | 0,383 | < 0.001 | 0,180 | 0,001 | - | - |
| PhG_L(R)_6_6 | 119 |  | *TH, area TH (medial PPHC)* | -17, -39, -10 | 19, -36, -11 | 0,397 | < 0.001 | 0,208 | < 0.001 | - | - |
| PhG_L(R)_6_6 |  | 120 | *TH, area TH (medial PPHC)* | -17, -39, -10 | 19, -36, -11 | 0,488 | < 0.001 | 0,207 | < 0.001 | 0,141 | 0,001 |
| pSTS, posterior Superior Temporal Sulcus | pSTS_L(R)_2_1 | 121 |  | *rpSTS, rostroposterior superior temporal sulcus* | -54, -40, 4 | 53, -37, 3 | 0,389 | < 0.001 | - | - | - | - |
| pSTS_L(R)_2_1 |  | 122 | *rpSTS, rostroposterior superior temporal sulcus* | -54, -40, 4 | 53, -37, 3 | - | - | 0,185 | 0,001 | 0,155 | < 0.001 |
| pSTS_L(R)_2_2 | 123 |  | *cpSTS, caudoposterior superior temporal sulcus* | -52, -50, 11 | 57, -40, 12 | 0,549 | < 0.001 | 0,162 | 0,003 | - | - |
| pSTS_L(R)_2_2 |  | 124 | *cpSTS, caudoposterior superior temporal sulcus* | -52, -50, 11 | 57, -40, 12 | 0,295 | < 0.001 | 0,239 | < 0.001 | - | - |
| Parietal Lobe | SPL, Superior Parietal Lobule | SPL_L(R)_5_1 | 125 |  | *A7r, rostral area 7* | -16, -60, 63 | 19, -57, 65 | 0,363 | < 0.001 | - | - | - | - |
| SPL_L(R)_5_1 |  | 126 | *A7r, rostral area 7* | -16, -60, 63 | 19, -57, 65 | - | - | 0,164 | 0,003 | - | - |
| SPL_L(R)_5_2 | 127 |  | *A7c, caudal area 7* | -15, -71, 52 | 19, -69, 54 | 0,327 | < 0.001 | 0,164 | 0,003 | - | - |
| SPL_L(R)_5_3 | 129 |  | *A5l, lateral area 5* | -33, -47, 50 | 35, -42, 54 | 0,373 | < 0.001 | - | - | - | - |
| SPL_L(R)_5_3 |  | 130 | *A5l, lateral area 5* | -33, -47, 50 | 35, -42, 54 | 0,327 | < 0.001 | - | - | - | - |
| SPL_L(R)_5_4 | 131 |  | *A7pc, postcentral area 7* | -22, -47, 65 | 23, -43, 67 | 0,375 | < 0.001 | - | - | - | - |
| SPL_L(R)_5_4 |  | 132 | *A7pc, postcentral area 7* | -22, -47, 65 | 23, -43, 67 | 0,288 | < 0.001 | 0,160 | 0,003 | - | - |
| SPL_L(R)_5_5 | 133 |  | *A7ip, intraparietal area 7(hIP3)* | -27, -59, 54 | 31, -54, 53 | 0,283 | < 0.001 | - | - | - | - |
| IPL, Inferior Parietal Lobule | IPL_L(R)_6_1 | 135 |  | *A39c, caudal area 39(PGp)* | -34, -80, 29 | 45, -71, 20 | 0,556 | < 0.001 | - | - | - | - |
| IPL_L(R)_6_1 |  | 136 | *A39c, caudal area 39(PGp)* | -34, -80, 29 | 45, -71, 20 | 0,536 | < 0.001 | 0,217 | < 0.001 | - | - |
| IPL_L(R)_6_2 | 137 |  | *A39rd, rostrodorsal area 39(Hip3)* | -38, -61, 46 | 39, -65, 44 | 0,269 | 0,001 | - | - | - | - |
| IPL_L(R)_6_2 |  | 138 | *A39rd, rostrodorsal area 39(Hip3)* | -38, -61, 46 | 39, -65, 44 | 0,303 | < 0.001 | - | - | - | - |
| IPL_L(R)_6_3 | 139 | 140 | *A40rd, rostrodorsal area 40(PFt)* | -51, -33, 42 | 47, -35, 45 | - | - | - | - | - | - |
| IPL_L(R)_6_4 | 141 |  | *A40c, caudal area 40(PFm)* | -56, -49, 38 | 57, -44, 38 | - | - | - | - | -0,157 | < 0.001 |
| IPL_L(R)_6_5 | 143 |  | *A39rv, rostroventral area 39(PGa)* | -47, -65, 26 | 53, -54, 25 | 0,225 | 0,004 | - | - | - | - |
| IPL_L(R)_6_5 |  | 144 | *A39rv, rostroventral area 39(PGa)* | -47, -65, 26 | 53, -54, 25 | 0,217 | 0,005 | 0,182 | 0,001 | - | - |
| IPL_L(R)_6_6 | 145 |  | *A40rv, rostroventral area 40(PFop)* | -53, -31, 23 | 55, -26, 26 | - | - | 0,200 | < 0.001 | - | - |
| Pcun, Precuneus | PCun_L(R)_4_1 | 147 |  | *A7m, medial area 7(PEp)* | -5, -63, 51 | 6, -65, 51 | 0,589 | < 0.001 | - | - | 0,196 | < 0.001 |
| PCun_L(R)_4_1 |  | 148 | *A7m, medial area 7(PEp)* | -5, -63, 51 | 6, -65, 51 | - | - | 0,203 | < 0.001 | - | - |
| PCun_L(R)_4_2 | 149 |  | *A5m, medial area 5(PEm)* | -8, -47, 57 | 7, -47, 58 | 0,393 | < 0.001 | 0,234 | < 0.001 | 0,164 | < 0.001 |
| PCun_L(R)_4_2 |  | 150 | *A5m, medial area 5(PEm)* | -8, -47, 57 | 7, -47, 58 | 0,331 | < 0.001 | 0,205 | < 0.001 | 0,143 | 0,001 |
| PCun_L(R)_4_3 | 151 |  | *dmPOS, dorsomedial parietooccipital sulcus(PEr)* | -12, -67, 25 | 16, -64, 25 | 0,457 | < 0.001 | - | - | - | - |
| PCun_L(R)_4_3 |  | 152 | *dmPOS, dorsomedial parietooccipital sulcus(PEr)* | -12, -67, 25 | 16, -64, 25 | 0,368 | < 0.001 | 0,203 | < 0.001 | - | - |
| PCun_L(R)_4_4 | 153 |  | *A31, area 31 (Lc1)* | -6, -55, 34 | 6, -54, 35 | 0,376 | < 0.001 | 0,244 | < 0.001 | - | - |
| PCun_L(R)_4_4 |  | 154 | *A31, area 31 (Lc1)* | -6, -55, 34 | 6, -54, 35 | 0,351 | < 0.001 | 0,157 | 0,004 | 0,142 | 0,001 |
| PoG, Postcentral Gyrus | PoG_L(R)_4_1 | 155 |  | *A1/2/3ulhf, area 1/2/3(upper limb, head and face region)* | -50, -16, 43 | 50, -14, 44 | 0,265 | 0,001 | 0,269 | < 0.001 | - | - |
| PoG_L(R)_4_1 |  | 156 | *A1/2/3ulhf, area 1/2/3(upper limb, head and face region)* | -50, -16, 43 | 50, -14, 44 | - | - | - | - | 0,179 | < 0.001 |
| PoG_L(R)_4_2 | 157 |  | *A1/2/3tonIa, area 1/2/3(tongue and larynx region)* | -56, -14, 16 | 56, -10, 15 | 0,318 | < 0.001 | 0,177 | 0,001 | - | - |
| PoG_L(R)_4_3 | 159 |  | *A2, area 2* | -46, -30, 50 | 48, -24, 48 | 0,349 | < 0.001 | - | - | - | - |
| PoG_L(R)_4_3 |  | 160 | *A2, area 2* | -46, -30, 50 | 48, -24, 48 | - | - | 0,200 | < 0.001 | - | - |
| PoG_L(R)_4_4 | 161 |  | *A1/2/3tru, area1/2/3(trunk region)* | -21, -35, 68 | 20, -33, 69 | 0,338 | < 0.001 | - | - | 0,150 | 0,001 |
| PoG_L(R)_4_4 |  | 162 | *A1/2/3tru, area1/2/3(trunk region)* | -21, -35, 68 | 20, -33, 69 | - | - | 0,205 | < 0.001 | - | - |
| Insular Lobe | INS, Insular Gyrus | INS_L(R)_6_1 | 163 |  | *G, hypergranular insula* | -36, -20, 10 | 37, -18, 8 | - | - | 0,269 | < 0.001 | - | - |
| INS_L(R)_6_1 |  | 164 | *G, hypergranular insula* | -36, -20, 10 | 37, -18, 8 | - | - | 0,189 | 0,001 | - | - |
| INS_L(R)_6_2 | 165 |  | *vIa, ventral agranular insula* | -32, 14, -13 | 33, 14, -13 | 0,241 | 0,002 | 0,197 | < 0.001 | 0,236 | < 0.001 |
| INS_L(R)_6_2 |  | 166 | *vIa, ventral agranular insula* | -32, 14, -13 | 33, 14, -13 | 0,347 | < 0.001 | 0,171 | 0,002 | - | - |
| INS_L(R)_6_3 | 167 |  | *dIa, dorsal agranular insula* | -34, 18, 1 | 36, 18, 1 | 0,344 | < 0.001 | 0,238 | < 0.001 | - | - |
| INS_L(R)_6_3 |  | 168 | *dIa, dorsal agranular insula* | -34, 18, 1 | 36, 18, 1 | 0,224 | 0,004 | 0,238 | < 0.001 | - | - |
| INS_L(R)_6_4 | 169 |  | *vId/vIg, ventral dysgranular and granular insula* | -38, -4, -9 | 39, -2, -9 | 0,362 | < 0.001 | 0,163 | 0,003 | - | - |
| INS_L(R)_6_4 |  | 170 | *vId/vIg, ventral dysgranular and granular insula* | -38, -4, -9 | 39, -2, -9 | 0,289 | < 0.001 | 0,211 | < 0.001 | - | - |
| INS_L(R)_6_5 | 171 |  | *dIg, dorsal granular insula* | -38, -8, 8 | 39, -7, 8 | 0,447 | < 0.001 | 0,299 | < 0.001 | - | - |
| INS_L(R)_6_5 |  | 172 | *dIg, dorsal granular insula* | -38, -8, 8 | 39, -7, 8 | - | - | 0,295 | < 0.001 | - | - |
| INS_L(R)_6_6 | 173 |  | *dId, dorsal dysgranular insula* | -38, 5, 5 | 38, 5, 5 | 0,374 | < 0.001 | 0,185 | 0,001 | - | - |
| INS_L(R)_6_6 |  | 174 | *dId, dorsal dysgranular insula* | -38, 5, 5 | 38, 5, 5 | 0,375 | < 0.001 | 0,212 | < 0.001 | 0,142 | 0,001 |
| Limbic Lobe | CG, Cingulate Gyrus | CG_L(R)_7_1 | 175 |  | *A23d, dorsal area 23* | -4, -39, 31 | 4, -37, 32 | 0,419 | < 0.001 | 0,200 | < 0.001 | - | - |
| CG_L(R)_7_1 |  | 176 | *A23d, dorsal area 23* | -4, -39, 31 | 4, -37, 32 | 0,425 | < 0.001 | 0,251 | < 0.001 | - | - |
| CG_L(R)_7_2 | 177 |  | *A24rv, rostroventral area 24* | -3, 8, 25 | 5, 22, 12 | 0,355 | < 0.001 | 0,284 | < 0.001 | - | - |
| CG_L(R)_7_2 |  | 178 | *A24rv, rostroventral area 24* | -3, 8, 25 | 5, 22, 12 | 0,428 | < 0.001 | 0,220 | < 0.001 | - | - |
| CG_L(R)_7_3 | 179 |  | *A32p, pregenual area 32* | -6, 34, 21 | 5, 28, 27 | 0,386 | < 0.001 | 0,311 | < 0.001 | 0,161 | < 0.001 |
| CG_L(R)_7_3 |  | 180 | *A32p, pregenual area 32* | -6, 34, 21 | 5, 28, 27 | 0,277 | < 0.001 | 0,282 | < 0.001 | - | - |
| CG_L(R)_7_4 | 181 |  | *A23v, ventral area 23* | -8, -47, 10 | 9, -44, 11 | - | - | - | - | 0,173 | < 0.001 |
| CG_L(R)_7_4 |  | 182 | *A23v, ventral area 23* | -8, -47, 10 | 9, -44, 11 | 0,413 | < 0.001 | 0,232 | < 0.001 | - | - |
| CG_L(R)_7_5 | 183 |  | *A24cd, caudodorsal area 24* | -5, 7, 37 | 4, 6, 38 | 0,260 | 0,001 | 0,250 | < 0.001 | - | - |
| CG_L(R)_7_5 |  | 184 | *A24cd, caudodorsal area 24* | -5, 7, 37 | 4, 6, 38 | - | - | 0,210 | < 0.001 | 0,261 | < 0.001 |
| CG_L(R)_7_6 | 185 |  | *A23c, caudal area 23* | -7, -23, 41 | 6, -20, 40 | - | - | 0,221 | < 0.001 | - | - |
| CG_L(R)_7_6 |  | 186 | *A23c, caudal area 23* | -7, -23, 41 | 6, -20, 40 | - | - | 0,196 | < 0.001 | - | - |
| CG_L(R)_7_7 | 187 |  | *A32sg, subgenual area 32* | -4, 39, -2 | 5, 41, 6 | 0,240 | 0,002 | 0,207 | < 0.001 | - | - |
|  |  | CG_L(R)_7_7 |  | 188 | *A32sg, subgenual area 32* | -4, 39, -2 | 5, 41, 6 | - | - | 0,209 | < 0.001 | - | - |
| Occipital Lobe | MVOcC*,* MedioVentral Occipital Cortex | MVOcC _L(R)_5_1 | 189 |  | *cLinG, caudal lingual gyrus* | -11, -82, -11 | 10, -85, -9 | 0,487 | < 0.001 | - | - | - | - |
| MVOcC _L(R)_5_1 |  | 190 | *cLinG, caudal lingual gyrus* | -11, -82, -11 | 10, -85, -9 | 0,455 | < 0.001 | 0,173 | 0,002 | - | - |
| MVOcC _L(R)_5_2 | 191 |  | *rCunG, rostral cuneus gyrus* | -5, -81, 10 | 7, -76, 11 | 0,397 | < 0.001 | - | - | - | - |
| MVOcC _L(R)_5_2 |  | 192 | *rCunG, rostral cuneus gyrus* | -5, -81, 10 | 7, -76, 11 | 0,565 | < 0.001 | - | - | - | - |
| MVOcC _L(R)_5_3 | 193 |  | *cCunG, caudal cuneus gyrus* | -6, -94, 1 | 8, -90, 12 | 0,451 | < 0.001 | - | - | - | - |
| MVOcC _L(R)_5_3 |  | 194 | *cCunG, caudal cuneus gyrus* | -6, -94, 1 | 8, -90, 12 | 0,430 | < 0.001 | - | - | - | - |
| MVOcC _L(R)_5_4 | 195 |  | *rLinG, rostral lingual gyrus* | -17, -60, -6 | 18, -60, -7 | 0,515 | < 0.001 | - | - | - | - |
| MVOcC _L(R)_5_4 |  | 196 | *rLinG, rostral lingual gyrus* | -17, -60, -6 | 18, -60, -7 | 0,486 | < 0.001 | 0,159 | 0,004 | 0,202 | < 0.001 |
| MVOcC _L(R)_5_5 | 197 |  | *vmPOS,ventromedial parietooccipital sulcus* | -13, -68, 12 | 15, -63, 12 | 0,531 | < 0.001 | - | - | - | - |
| MVOcC _L(R)_5_5 |  | 198 | *vmPOS,ventromedial parietooccipital sulcus* | -13, -68, 12 | 15, -63, 12 | 0,465 | < 0.001 | 0,155 | 0,005 | 0,189 | < 0.001 |
| LOcC, lateral Occipital Cortex | LOcC_L(R)_4_1 | 199 |  | *mOccG, middle occipital gyrus* | -31, -89, 11 | 34, -86, 11 | 0,640 | < 0.001 | 0,164 | 0,003 | - | - |
| LOcC_L(R)_4_1 |  | 200 | *mOccG, middle occipital gyrus* | -31, -89, 11 | 34, -86, 11 | 0,591 | < 0.001 | 0,210 | < 0.001 | 0,174 | < 0.001 |
| LOcC _L(R)_4_2 | 201 |  | *V5/MT+, area V5/MT+* | -46, -74, 3 | 48, -70, -1 | 0,512 | < 0.001 | 0,210 | < 0.001 | 0,197 | < 0.001 |
| LOcC _L(R)_4_2 |  | 202 | *V5/MT+, area V5/MT+* | -46, -74, 3 | 48, -70, -1 | 0,510 | < 0.001 | 0,210 | < 0.001 | - | - |
| LOcC _L(R)_4_3 | 203 |  | *OPC, occipital polar cortex* | -18, -99, 2 | 22, -97, 4 | 0,326 | < 0.001 | - | - | - | - |
| LOcC _L(R)_4_3 |  | 204 | *OPC, occipital polar cortex* | -18, -99, 2 | 22, -97, 4 | 0,593 | < 0.001 | - | - | - | - |
| LOcC_L(R)_4_4 | 205 |  | *iOccG, inferior occipital gyrus* | -30, -88, -12 | 32, -85, -12 | 0,388 | < 0.001 | 0,192 | < 0.001 | 0,161 | < 0.001 |
| LOcC_L(R)_4_4 |  | 206 | *iOccG, inferior occipital gyrus* | -30, -88, -12 | 32, -85, -12 | 0,562 | < 0.001 | - | - | 0,233 | < 0.001 |
| LOcC _L(R)_2_1 | 207 |  | *msOccG, medial superior occipital gyrus* | -11, -88, 31 | 16, -85, 34 | 0,573 | < 0.001 | - | - | - | - |
| LOcC _L(R)_2_1 |  | 208 | *msOccG, medial superior occipital gyrus* | -11, -88, 31 | 16, -85, 34 | 0,535 | < 0.001 | - | - | - | - |
| LOcC _L(R)_2_2 | 209 |  | *lsOccG, lateral superior occipital gyrus* | -22, -77, 36 | 29, -75, 36 | 0,563 | < 0.001 | - | - | - | - |
| LOcC _L(R)_2_2 |  | 210 | *lsOccG, lateral superior occipital gyrus* | -22, -77, 36 | 29, -75, 36 | 0,505 | < 0.001 | - | - | - | - |
| Subcortical Nuclei | Amyg, Amygdala | Amyg_L(R)_2_1 | 211 |  | *mAmyg, medial amygdala* | -19, -2, -20 | 19, -2, -19 | 0,251 | 0,001 | 0,224 | < 0.001 | - | - |
| Amyg_L(R)_2_1 |  | 212 | *mAmyg, medial amygdala* |  |  | 0,306 | < 0.001 | 0,256 | < 0.001 | - | - |
| Amyg_L(R)_2_2 | 213 |  | *lAmyg, lateral amygdala* | -27, -4, -20 | 28, -3, -20 | 0,278 | < 0.001 | 0,218 | < 0.001 | 0,140 | 0,001 |
| Amyg_L(R)_2_2 |  | 214 | *lAmyg, lateral amygdala* |  |  | 0,576 | < 0.001 | 0,197 | < 0.001 | - | - |

**ROI Comparaison : AFSD - VIFD**

Direct pairwise comparisons between datasets further indicated that AFSD showed significantly predictive accuracy than VIFD in 51 regions, with *r* differences ranging from 0.103 to 0.382 (FDR-corrected *p* < 0.05). The largest effect was observed in the right lateral amygdala (AUC difference = 0.382), followed by regions in the occipital and temporal cortices, including the left middle occipital gyrus (0.297), the left lateral superior occipital gyrus (0.284), and the right middle temporal gyrus (0.282).

Widespread differences were observed across frontal, occipital, temporal, parietal, limbic, and insular cortices. In the frontal lobe, AFSD outperformed VIFD in premotor and motor regions (precentral gyrus; areas A6cdl, A4ul, A4t), as well as in multiple prefrontal areas, including the middle frontal gyrus (A10l, A9/46v), inferior frontal gyrus (A44d, inferior frontal sulcus), inferior frontal junction, and superior frontal gyrus (A8dl), indicating stronger engagement of executive and motor-related processes.

Other differences were seen in the occipital cortex, spanning both lateral and medioventral visual regions. These included the middle, inferior, and lateral superior occipital gyri, the occipital pole, motion-sensitive area V5/MT+, as well as lingual and cuneus regions (rostral and caudal). Additional differences were observed in medial and ventromedial parieto-occipital sulcal regions (dmPOS, vmPOS), highlighting robust modulation across early and higher-order visual processing areas.

In the temporal lobe, AFSD showed higher decoding accuracy in the middle and inferior temporal gyri, the fusiform gyrus (bilaterally), and multiple subdivisions of the parahippocampal gyrus, pointing to stronger engagement of ventral and medial temporal structures. Differences were also present in parietal regions, including the inferior parietal lobule and the precuneus, as well as in limbic areas, notably the cingulate gyrus. Finally, significant effects in the insula further underscore the distributed nature of the networks differentiating AFSD from VIFD.

**ROI Comparaison : AFSD - CoFD**

Direct pairwise comparisons between datasets further indicated that AFSD showed significantly higher predictive accuracy than CoFD in 42 regions, with *r* differences ranging from 0.128 to 0.294 (FDR-corrected p < 0.05). The largest effects were observed in the occipital cortex, including the right medial superior occipital gyrus (AUC difference = 0.294), the right middle occipital gyrus (0.274), and the right rostral cuneus gyrus (0.271). Additional prominent differences were found in ventral temporal regions and the right lateral amygdala (0.194).

As in the AFSD–VIFD comparison, widespread differences were observed across frontal, occipital, temporal, parietal, and subcortical regions. In the frontal lobe, AFSD showed higher decoding accuracy than CoFD in prefrontal and premotor regions, including the inferior frontal junction, ventrolateral premotor cortex (A6vl), dorsolateral superior frontal gyrus (A8dl), and orbitofrontal cortex (area 13), suggesting enhanced involvement of executive control, motor planning, and valuation-related processes.

Differences were again particularly pronounced throughout the occipital cortex, encompassing both lateral and medioventral visual regions. These included medial, middle, inferior, and lateral superior occipital gyri, the occipital pole, motion-sensitive area V5/MT+, as well as lingual and cuneus regions (rostral and caudal). Effects extended into ventromedial and dorsomedial parieto-occipital sulcal regions (vmPOS, dmPOS), indicating robust modulation across visual and visuospatial processing hierarchies.

In the temporal lobe, AFSD outperformed CoFD in a broad set of ventral and lateral temporal regions, including the fusiform gyrus, inferior and middle temporal gyri, posterior superior temporal sulcus, and several parahippocampal subdivisions. The right lateral amygdala also showed higher predictive accuracy in AFSD. Additional differences were observed in parietal regions, including the inferior and superior parietal lobules and the precuneus.

No regions showed significantly better prediction for either VIFD or CoFD when compared with one another after multiple-comparison correction.

When performing pairwise comparisons of decoder performance between AFSD, VIFD and CoFD across all 214 brain regions, we found a systematic pattern: AFSD consistently showed higher predictive accuracy than both VIFD and CoFD, with significantly greater involvement of visual and associative regions, including the fusiform gyrus, lateral occipital cortex, and parahippocampal gyrus (see Figure 6). Critically, the VIFD and CoFD datasets did not differ significantly across any brain region after FDR correction. Notably, the AFSD–VIFD contrast was characterized by additional engagement of limbic and insular regions, whereas the AFSD–CoFD contrast showed a more pronounced occipito-temporal dominance, highlighting both shared and dataset-specific contributions to decoding performance.


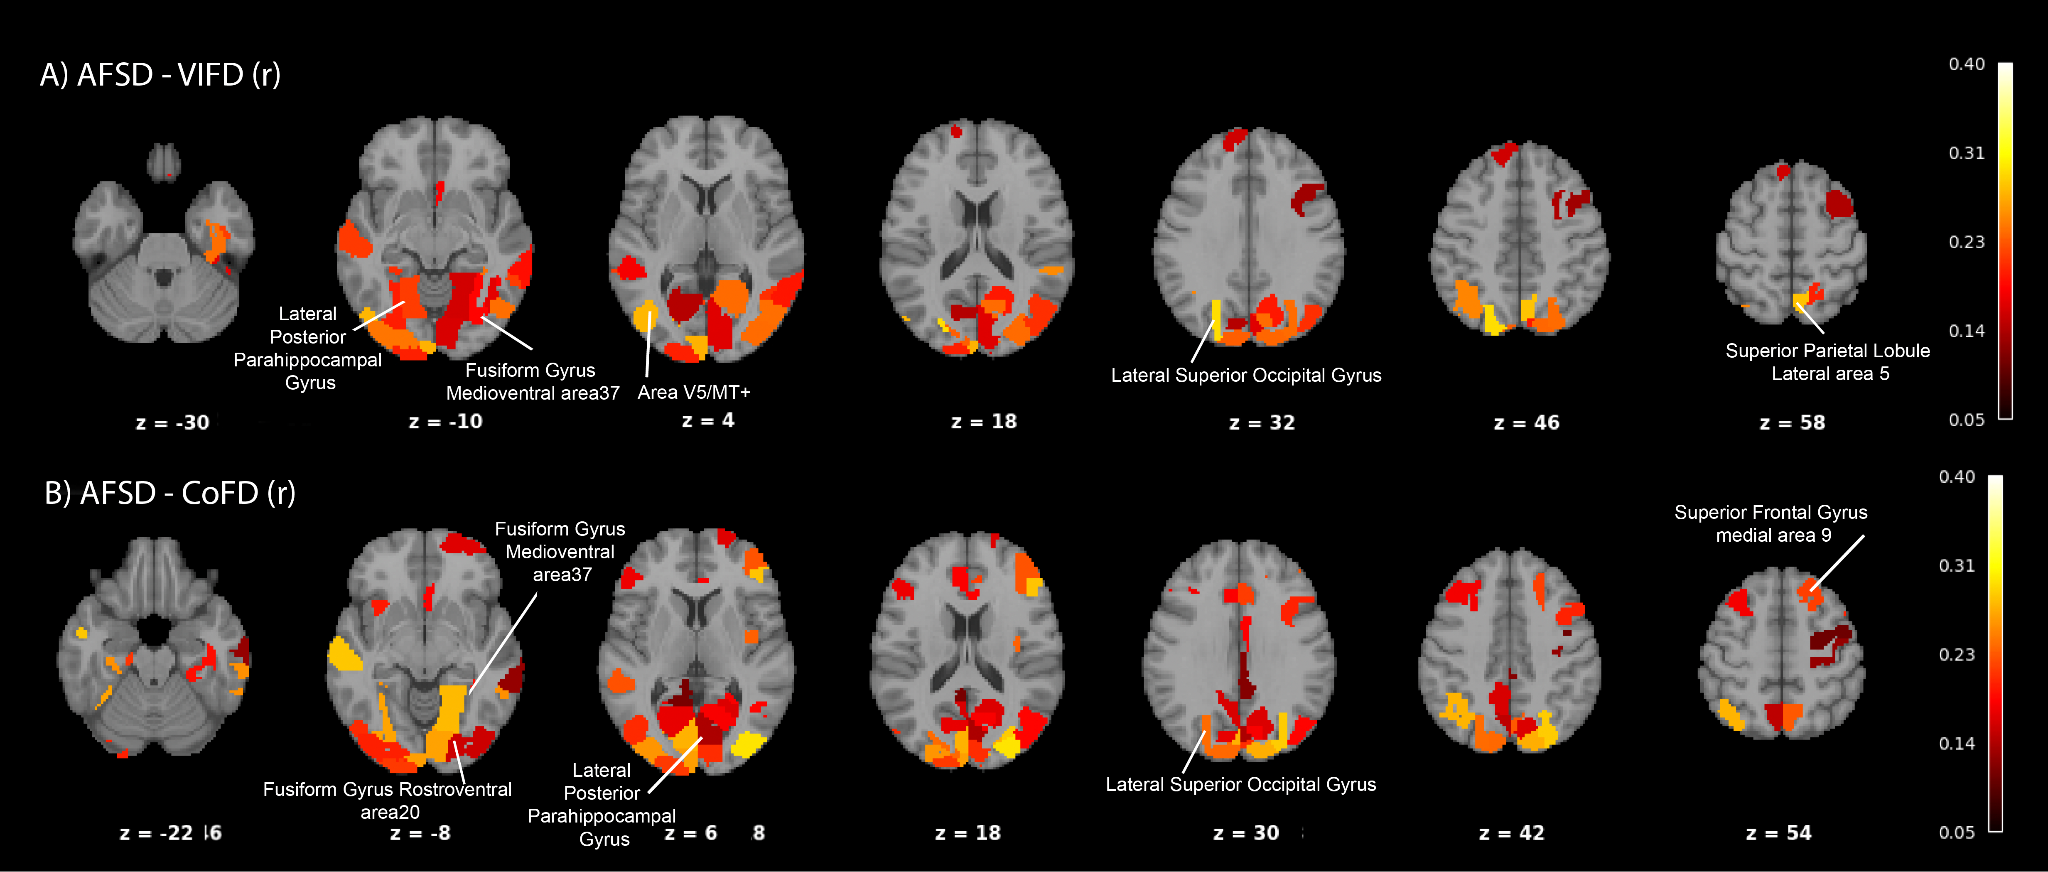


**Figure S6. AFSD engages more distributed neural representations than VIFD and CoFD.** Direct pairwise comparisons of decoding accuracy (Pearson r) between datasets across the Brainnetome Atlas. (A) Regions where AFSD showed significantly higher predictive accuracy than VIFD. (B) Regions where AFSD showed significantly higher accuracy than CoFD. The maps highlight the broader neural network supporting AFSD, with the largest r differences observed in visual association cortices (fusiform gyrus, lateral occipital cortex), memory-related regions (parahippocampal gyrus), and prefrontal areas. Selected regions of interest are labelled for illustration. No regions showed superior decoding for either VIFD or CoFD relative to AFSD, and no significant differences between VIFD and CoFD remained after FDR correction (p < 0.05).

**Table S6. ROI Correlation for Pairwise Datasets**

| **Lobe** | **Gyrus** | **Left and Right Hemisphere** | **Label ID.L** | **Label ID.R** | **Anatomical and modified Cyto-architectonic descriptions** | **lh.MNI(X,Y,Z)** | **rh.MNI(X,Y,Z)** | **AFSD - VIFD**  **(n = 62)** | | **AFSD - CoFD**  **(n = 62)** | | **VIFD - CoFD**  **(n = 134)** | |
| --- | --- | --- | --- | --- | --- | --- | --- | --- | --- | --- | --- | --- | --- |
| **r** | **p** | **r** | **p** | **r** | **p** |
| Frontal Lobe | SFG, Superior Frontal Gyrus | SFG_L(R)_7_2 | 3 |  | *A8dl, dorsolateral area 8* | -18, 24, 53 | 22, 26, 51 |  |  | 3,421 | 0,001 |  |  |
| SFG_L(R)_7_2 |  | 4 | *A8dl, dorsolateral area 8* |  |  | 3,333 | 0,001 |  |  |  |  |
| MFG, Middle Frontal Gyrus | MFG_L(R)_7_2 | 17 |  | *IFJ, inferior frontal junction* | -42, 13, 36 | 42, 11, 39 | 3,486 | < 0.001 | 3,409 | 0,001 |  |  |
| MFG_L(R)_7_4 | 21 |  | *A9/46v, ventral area 9/46* | -41, 41, 16 | 42, 44, 14 |  |  | 4,128 | < 0.001 |  |  |
| MFG_L(R)_7_4 |  | 22 | *A9/46v, ventral area 9/46* | -41, 41, 16 | 42, 44, 14 |  |  | 3,345 | 0,001 |  |  |
| MFG_L(R)_7_6 | 25 |  | *A6vl, ventrolateral area 6* | -32, 4, 55 | 34, 8, 54 | 3,385 | 0,001 |  |  |  |  |
| MFG_L(R)_7_7 | 27 |  | *A10l, lateral area10* | -26, 60, -6 | 25, 61, -4 |  |  | 3,848 | < 0.001 |  |  |
| IFG, Inferior Frontal Gyrus | IFG_L(R)_6_1 |  | 30 | *A44d,dorsal area 44* | -46, 13, 24 | 45, 16, 25 |  |  | 3,389 | 0,001 |  |  |
| IFG_L(R)_6_2 | 31 |  | *IFS, inferior frontal sulcus* | -47, 32, 14 | 48, 35, 13 |  |  | 4,372 | < 0.001 |  |  |
| OrG, Orbital Gyrus | OrG_L(R)_6_5 | 49 |  | *A13, area 13* | -10, 18, -19 | 9, 20, -19 | 3,437 | 0,001 |  |  |  |  |
| PrG, Precentral Gyrus | PrG_L(R)_6_2 | 55 |  | *A6cdl, caudal dorsolateral area 6* | -32, -9, 58 | 33, -7, 57 |  |  | 3,467 | 0,001 |  |  |
| PrG_L(R)_6_3 | 57 |  | *A4ul, area 4(upper limb region)* | -26, -25, 63 | 34, -19, 59 |  |  | 3,687 | < 0.001 |  |  |
| PrG_L(R)_6_4 | 59 |  | *A4t, area 4(trunk region)* | -13, -20, 73 | 15, -22, 71 |  |  | 3,751 | < 0.001 |  |  |
| Temporal Lobe | MTG, Middle Temporal Gyrus | MTG_L(R)_4_1 | 81 |  | *A21c, caudal area 21* | -65, -30, -12 | 65, -29, -13 | 3,848 | < 0.001 | 3,196 | 0,001 |  |  |
| MTG_L(R)_4_3 | 85 |  | *A37dl, dorsolateral area37* | -59, -58, 4 | 60, -53, 3 | 4,297 | < 0.001 |  |  |  |  |
| MTG_L(R)_4_3 |  | 86 | *A37dl, dorsolateral area37* | -59, -58, 4 | 60, -53, 3 | 3,170 | 0,002 | 3,879 | < 0.001 |  |  |
| ITG, Inferior Temporal Gyrus | ITG_L(R)_7_1 | 89 |  | *A20iv, intermediate ventral area 20* | -45, -26, -27 | 46, -14, -33 | 3,414 | 0,001 |  |  |  |  |
| ITG_L(R)_7_2 | 91 |  | *A37elv, extreme lateroventral area37* | -51, -57, -15 | 53, -52, -18 | 4,054 | < 0.001 |  |  |  |  |
| ITG_L(R)_7_6 | 99 |  | *A20cl, caudolateral of area 20* | -59, -42, -16 | 61, -40, -17 | 3,627 | < 0.001 | 3,701 | < 0.001 |  |  |
| FuG, Fusiform Gyrus | FuG_L(R)_3_1 | 103 |  | *A20rv, rostroventral area 20* | -33, -16, -32 | 33, -15, -34 | 5,281 | < 0.001 | 3,923 | < 0.001 |  |  |
| FuG_L(R)_3_1 |  | 104 | *A20rv, rostroventral area 20* | -33, -16, -32 | 33, -15, -34 | 4,233 | < 0.001 | 3,916 | < 0.001 |  |  |
| FuG_L(R)_3_2 | 105 |  | *A37mv, medioventral area37* | -31, -64, -14 | 31, -62, -14 | 4,161 | < 0.001 |  |  |  |  |
| FuG_L(R)_3_3 | 107 |  | *A37lv, lateroventral area37* | -42, -51, -17 | 43, -49, -19 | 3,728 | < 0.001 |  |  |  |  |
| PhG, Parahippocampal Gyrus | PhG_L(R)_6_2 |  | 112 | *A35/36c, caudal area 35/36* | -25, -25, -26 | 26, -23, -27 | 5,040 | < 0.001 | 5,593 | < 0.001 |  |  |
| PhG_L(R)_6_3 | 113 |  | *TL, area TL (lateral PPHC, posterior parahippocampal gyrus)* | -28, -32, -18 | 30, -30, -18 | 3,512 | < 0.001 |  |  |  |  |
| PhG_L(R)_6_3 |  | 114 | *TL, area TL (lateral PPHC, posterior parahippocampal gyrus)* | -28, -32, -18 | 30, -30, -18 |  |  | 3,428 | 0,001 |  |  |
| PhG_L(R)_6_6 |  | 120 | *TH, area TH (medial PPHC)* | -17, -39, -10 | 19, -36, -11 | 3,472 | 0,001 | 3,742 | < 0.001 |  |  |
| pSTS, posterior Superior Temporal Sulcus | pSTS_L(R)_2_2 | 123 |  | *cpSTS, caudoposterior superior temporal sulcus* | -52, -50, 11 | 57, -40, 12 | 4,933 | < 0.001 |  |  |  |  |
| Parietal Lobe | SPL, Superior Parietal Lobule | SPL_L(R)_5_1 | 125 |  | *A7r, rostral area 7* | -16, -60, 63 | 19, -57, 65 | 3,707 | < 0.001 |  |  |  |  |
| IPL, Inferior Parietal Lobule | IPL_L(R)_6_1 | 135 |  | *A39c, caudal area 39(PGp)* | -34, -80, 29 | 45, -71, 20 | 5,088 | < 0.001 | 3,672 | < 0.001 |  |  |
| IPL_L(R)_6_1 |  | 136 | *A39c, caudal area 39(PGp)* | -34, -80, 29 | 45, -71, 20 | 4,157 | < 0.001 | 4,691 | < 0.001 |  |  |
| IPL_L(R)_6_6 |  | 146 | *A40rv, rostroventral area 40(PFop)* | -53, -31, 23 | 55, -26, 26 |  |  | 3,118 | 0,002 |  |  |
| Pcun, Precuneus | PCun_L(R)_4_1 | 147 |  | *A7m, medial area 7(PEp)* | -5, -63, 51 | 6, -65, 51 | 5,527 | < 0.001 | 3,607 | < 0.001 |  |  |
| PCun_L(R)_4_3 | 151 |  | *dmPOS, dorsomedial parietooccipital sulcus(PEr)* | -12, -67, 25 | 16, -64, 25 | 3,646 | < 0.001 | 3,160 | 0,002 |  |  |
| PCun_L(R)_4_3 |  | 152 | *dmPOS, dorsomedial parietooccipital sulcus(PEr)* | -12, -67, 25 | 16, -64, 25 |  |  | 3,899 | < 0.001 |  |  |
| Insular Lobe | INS, Insular Gyrus | INS_L(R)_6_1 |  | 164 | *G, hypergranular insula* | -36, -20, 10 | 37, -18, 8 |  |  | 3,217 | 0,001 |  |  |
| INS_L(R)_6_5 | 171 |  | *dIg, dorsal granular insula* | -38, -8, 8 | 39, -7, 8 |  |  | 3,278 | 0,001 |  |  |
| Limbic Lobe | CG, Cingulate Gyrus | CG_L(R)_7_1 | 175 |  | *A23d, dorsal area 23* | -4, -39, 31 | 4, -37, 32 |  |  | 3,489 | < 0.001 |  |  |
| CG_L(R)_7_2 | 177 |  | *A24rv, rostroventral area 24* | -3, 8, 25 | 5, 22, 12 |  |  | 3,700 | < 0.001 |  |  |
| CG_L(R)_7_2 |  | 178 | *A24rv, rostroventral area 24* | -3, 8, 25 | 5, 22, 12 |  |  | 3,914 | < 0.001 |  |  |
| CG_L(R)_7_3 | 179 |  | *A32p, pregenual area 32* | -6, 34, 21 | 5, 28, 27 |  |  | 3,664 | < 0.001 |  |  |
| CG_L(R)_7_3 |  | 180 | *A32p, pregenual area 32* | -6, 34, 21 | 5, 28, 27 |  |  | 3,825 | < 0.001 |  |  |
| Occipital Lobe | MVOcC*,* MedioVentral Occipital Cortex | MVOcC _L(R)_5_1 | 189 |  | *cLinG, caudal lingual gyrus* | -11, -82, -11 | 10, -85, -9 | 3,505 | < 0.001 | 3,833 | < 0.001 |  |  |
| MVOcC _L(R)_5_1 |  | 190 | *cLinG, caudal lingual gyrus* | -11, -82, -11 | 10, -85, -9 |  |  | 3,793 | < 0.001 |  |  |
| MVOcC _L(R)_5_2 | 191 |  | *rCunG, rostral cuneus gyrus* | -5, -81, 10 | 7, -76, 11 | 3,362 | 0,001 | 3,209 | 0,001 |  |  |
| MVOcC _L(R)_5_2 |  | 192 | *rCunG, rostral cuneus gyrus* | -5, -81, 10 | 7, -76, 11 | 4,907 | < 0.001 | 4,231 | < 0.001 |  |  |
| MVOcC _L(R)_5_3 | 193 |  | *cCunG, caudal cuneus gyrus* | -6, -94, 1 | 8, -90, 12 | 4,029 | < 0.001 | 4,199 | < 0.001 |  |  |
| MVOcC _L(R)_5_3 |  | 194 | *cCunG, caudal cuneus gyrus* | -6, -94, 1 | 8, -90, 12 | 3,936 | < 0.001 |  |  |  |  |
| MVOcC _L(R)_5_4 | 195 |  | *rLinG, rostral lingual gyrus* | -17, -60, -6 | 18, -60, -7 | 3,669 | < 0.001 | 5,113 | < 0.001 |  |  |
| MVOcC _L(R)_5_4 |  | 196 | *rLinG, rostral lingual gyrus* | -17, -60, -6 | 18, -60, -7 | 3,480 | 0,001 | 3,651 | < 0.001 |  |  |
| MVOcC _L(R)_5_5 | 197 |  | *vmPOS,ventromedial parietooccipital sulcus* | -13, -68, 12 | 15, -63, 12 | 4,914 | < 0.001 | 3,847 | < 0.001 |  |  |
| MVOcC _L(R)_5_5 |  | 198 | *vmPOS,ventromedial parietooccipital sulcus* | -13, -68, 12 | 15, -63, 12 |  |  | 4,252 | < 0.001 |  |  |
| LOcC, lateral Occipital Cortex | LOcC_L(R)_4_1 | 199 |  | *mOccG, middle occipital gyrus* | -31, -89, 11 | 34, -86, 11 | 5,385 | < 0.001 | 6,351 | < 0.001 |  |  |
| LOcC_L(R)_4_1 |  | 200 | *mOccG, middle occipital gyrus* | -31, -89, 11 | 34, -86, 11 | 4,964 | < 0.001 | 3,986 | < 0.001 |  |  |
| LOcC _L(R)_4_2 | 201 |  | *V5/MT+, area V5/MT+* | -46, -74, 3 | 48, -70, -1 | 3,392 | 0,001 |  |  |  |  |
| LOcC _L(R)_4_2 |  | 202 | *V5/MT+, area V5/MT+* | -46, -74, 3 | 48, -70, -1 | 3,703 | < 0.001 | 4,143 | < 0.001 |  |  |
| LOcC _L(R)_4_3 |  | 204 | *OPC, occipital polar cortex* | -18, -99, 2 | 22, -97, 4 | 5,174 | < 0.001 | 4,128 | < 0.001 |  |  |
| LOcC_L(R)_4_4 | 205 |  | *iOccG, inferior occipital gyrus* | -30, -88, -12 | 32, -85, -12 |  |  | 3,864 | < 0.001 |  |  |
| LOcC_L(R)_4_4 |  | 206 | *iOccG, inferior occipital gyrus* | -30, -88, -12 | 32, -85, -12 | 4,651 | < 0.001 | 4,555 | < 0.001 |  |  |
| LOcC _L(R)_2_1 | 207 |  | *msOccG, medial superior occipital gyrus* | -11, -88, 31 | 16, -85, 34 | 5,495 | < 0.001 | 5,510 | < 0.001 |  |  |
| LOcC _L(R)_2_1 |  | 208 | *msOccG, medial superior occipital gyrus* | -11, -88, 31 | 16, -85, 34 | 4,826 | < 0.001 | 3,391 | 0,001 |  |  |
| LOcC _L(R)_2_2 | 209 |  | *lsOccG, lateral superior occipital gyrus* | -22, -77, 36 | 29, -75, 36 | 4,822 | < 0.001 | 4,621 | < 0.001 |  |  |
| LOcC _L(R)_2_2 |  | 210 | *lsOccG, lateral superior occipital gyrus* | -22, -77, 36 | 29, -75, 36 | 4,032 | < 0.001 | 4,047 | < 0.001 |  |  |
| Subcortical Nuclei | Amyg, Amygdala | Amyg_L(R)_2_2 |  | 214 | *lAmyg, lateral amygdala* | 4,150 | < 0.001 |  |  | 6,549 | < 0.001 |  |  |

**Supplementary Data**

**Datasets used**

**AFSD**: We used the freely accessible AFSD [(Taschereau-Dumouchel et al., 2020)](https://www.zotero.org/google-docs/?broken=qTzutK), comprising 31 participants (15 women; mean age 21.5 ± 2.1 years). Participants were specifically selected based on high fear ratings (5-6 on a 6-point Likert scale) for at least one of 30 animal categories. Each participant completed 800 trials with brain data averaged within-subject by fear level. This dataset investigates schema-based fear through presentations of animal pictures to individuals with pre-existing animal fears.

**VIFD**: We analyzed the publicly available VIFD [(Zhou et al., 2021)](https://www.zotero.org/google-docs/?broken=ewQDKS) comprising 67 participants (34 women; mean age 23.29 ± 4.21 years). Participants completed 80 fear judgments each across four runs of 20 pictures, rating their fear on a 5-point Likert scale. Brain data were averaged within-subjects by fear level. We selected this dataset because it involves situational fear, likely involving more semantic knowledge, as participants were not selected for a specific fear and are thus unlikely to have schemas related to any particular category of images. This dataset features images across various categories (people, faces, animals, objects, and landscapes) from the International Affective Picture System (IAPS), the Nencki Affective Picture System (NAPS), and the Internet.

**CoFD**: Finally, we employed the Conditioned Fear Dataset (CoFD) [(Davignon et al., 2025)](https://www.zotero.org/google-docs/?broken=kkdvff), which included 175 participants (153 of whom were analyzed after exclusions; 118 women; mean age = 26.55 ± 3.12 years). This dataset assessed subjective fear via shock expectancy ratings following a classical conditioning paradigm in which three coloured lights (yellow, red, and blue) served as contextual cues, adapted from Milad et al. (2007). The paradigm consisted of two sessions conducted on consecutive days, both acquired using fMRI in Montreal, Canada. During each phase, participants viewed repeated presentations of conditioned (CS+) and non-conditioned (CS−) stimuli, with no shocks delivered during extinction or renewal. Shock expectancy ratings, measured on a 5-point Likert scale, were collected at the end of each session for the first and last presentations of each CS type, providing a subjective index of learned fear. In total, participants provided 16 fear judgments each.

**Table S1 : Distribution of the number of fear judgments by dataset.**

| **Number of Fear Judgments** | **AFSD (n)** | **VIFD (n)** | **CoFD (n)** |
| --- | --- | --- | --- |
| 1 | 0 | 0 | 1 |
| 2 | 0 | 0 | 23 |
| 3 | 2 | 0 | 45 |
| 4 | 2 | 2 | 57 |
| 5 | 13 | 65 | 24 |
| 6 | 14 | 0 | 0 |

Ratings of 3 were grouped with 4-5 ratings due to the lower frequency of 4-5 responses compared to 1-2 responses.

**Table S2 : Distribution of subjective values by dataset**

| **Fear Type** | **Subjective Value** | **AFSD (n)1** | **VIFD (n)1** | **CoFD (n)1** |
| --- | --- | --- | --- | --- |
| Low Fear | 0 | 28 | n/a | n/a |
| 1 | 29 | 67 | 144 |
| 2 | 29 | 67 | 93 |
| High Fear | 3 | 29 | 67 | 120 |
| 4 | 30 | 67 | 100 |
| 5 | 18 | 65 | 73 |

1 Fear judgments were averaged per participant.

**Table S3: Correlation of subjective fear judgments with brain activation according to each dataset with dataset reduction (n=31)**

| **Dataset** | **Pearson Correlation (r)** | **corrected p-value (*p*)** | **Area Under the Curve (AUC)** | **corrected p-value (*p*)** |
| --- | --- | --- | --- | --- |
| AFSD | 0.749* | < 0.001 | 0.880* | 0.002 |
| VIFD**†** | 0.545* | < 0.001 | 0.744* | 0.002 |
| CoFD**†** | 0.265* | 0.010 | 0.620* | 0.032 |
| AFSD(*VIFD*)**1†** | 0.122 | 0.147 | 0.571* | 0.081 |
| AFSD(*CoFD*)**1†** | 0.139 | 0.150 | 0.578* | 0.081 |
| VIFD(*AFSD*)**1†** | 0.645* | < 0.001 | 0.824* | 0.002 |
| VIFD(*CoFD*)**1†** | 0.248 | 0.014 | 0.615* | 0.032 |
| CoFD(*AFSD*)**1†** | 0.507* | < 0.001 | 0.719* | 0.002 |
| CoFD(*VIFD*)**1†** | 0.133 | 0.128 | 0.567 | 0.081 |

1 Cross-prediction to see if brain patterns learned in one model dataset can be generalized to another dataset, where “Model(*Data*)”. * = p < 0.05 after FDR correction. **†** = after reduction (n=31)

After downsampling VIFD and CoFD to match the AFSD sample size (n = 31), cross-prediction performance was substantially weakened, with most effects no longer reaching statistical significance. This pattern suggests that the larger sample sizes in VIFD and CoFD contributed to the robustness of the original cross-prediction results.

**Figure S1. Representational Dissimilarity Matrix (RDM) for each dataset**

**
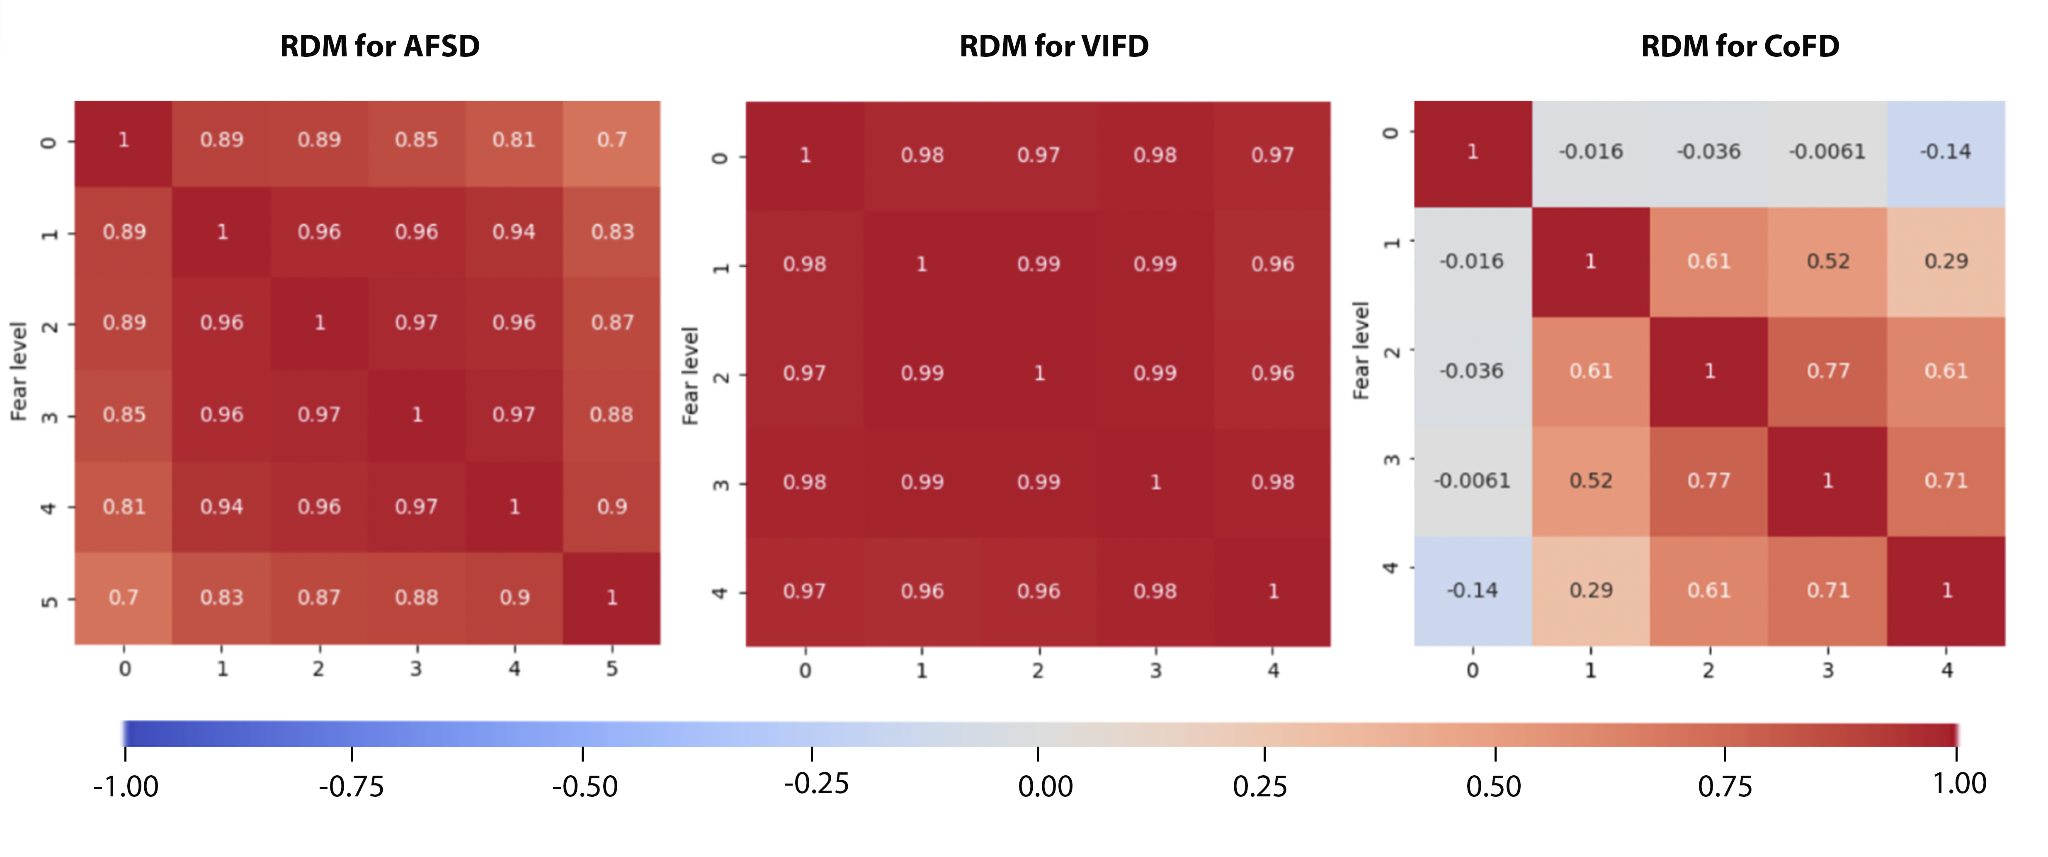
**

**Figure S2 : R brainmap for each dataset**


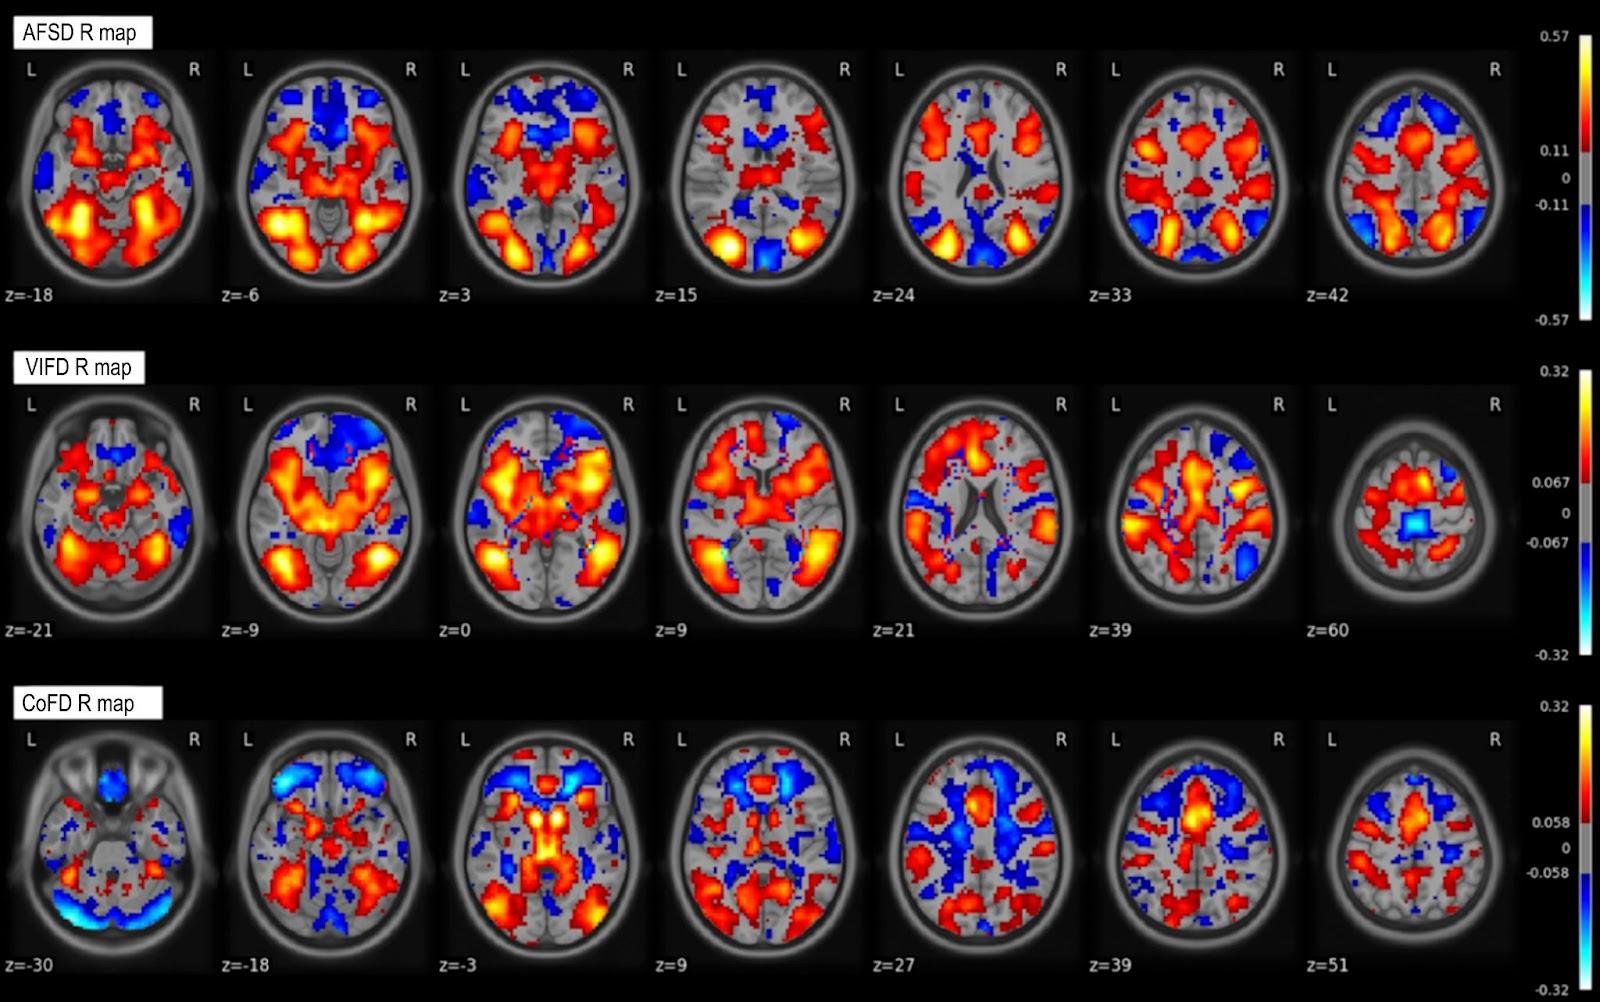


**Figure S3 : Z-value of each dataset for networks**


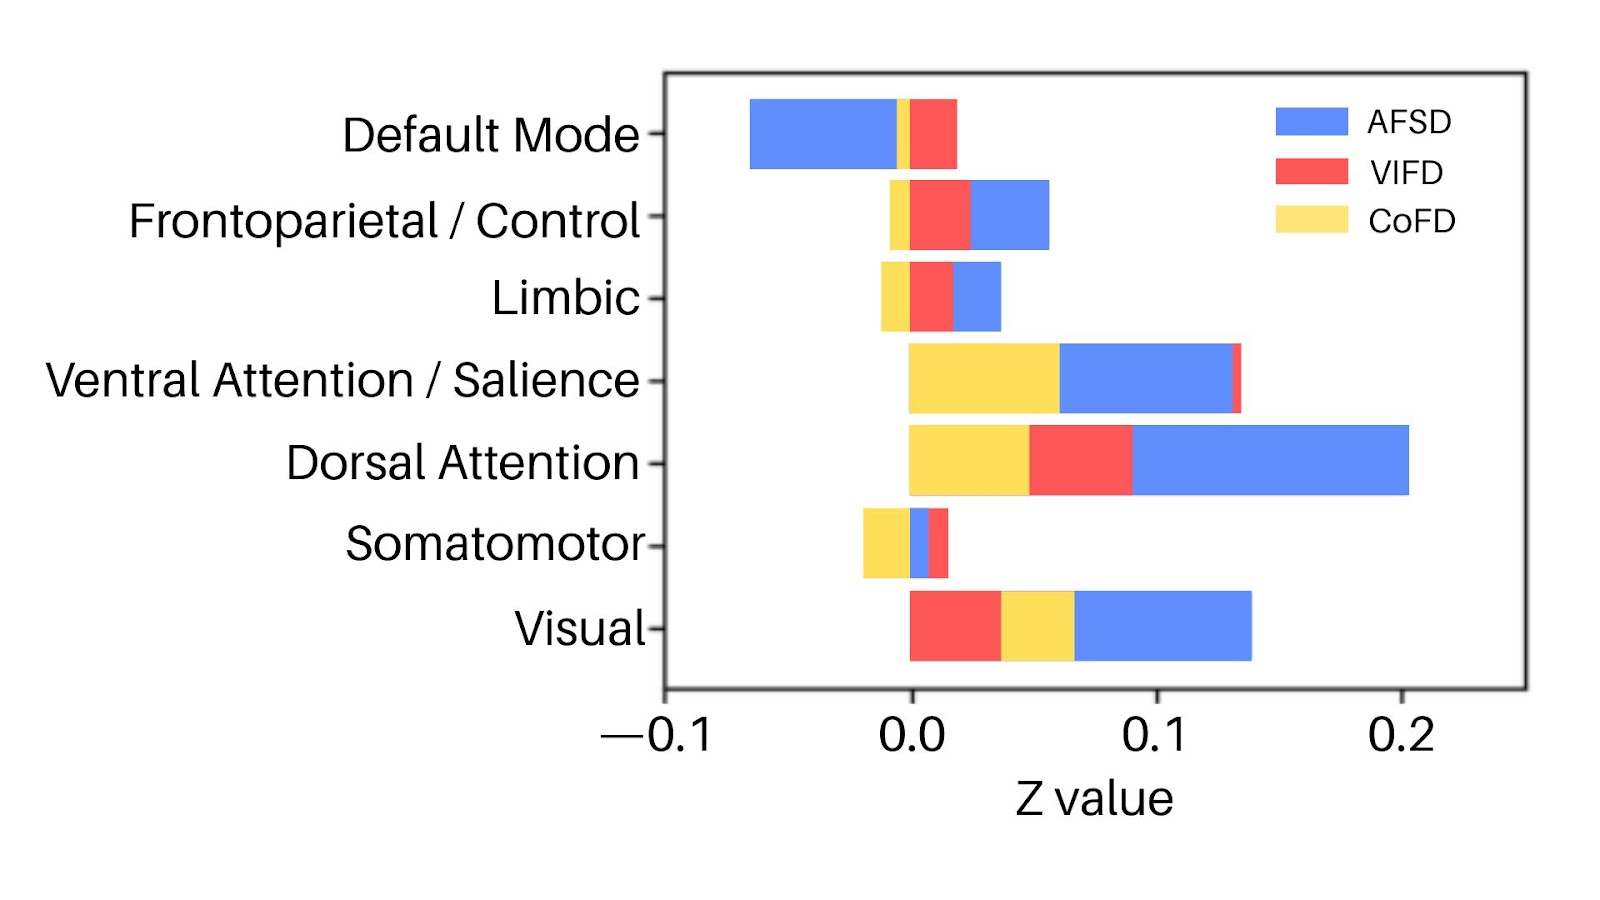


**Figure S4. Top 2% of r values by ROI (Normalized by max r value)**


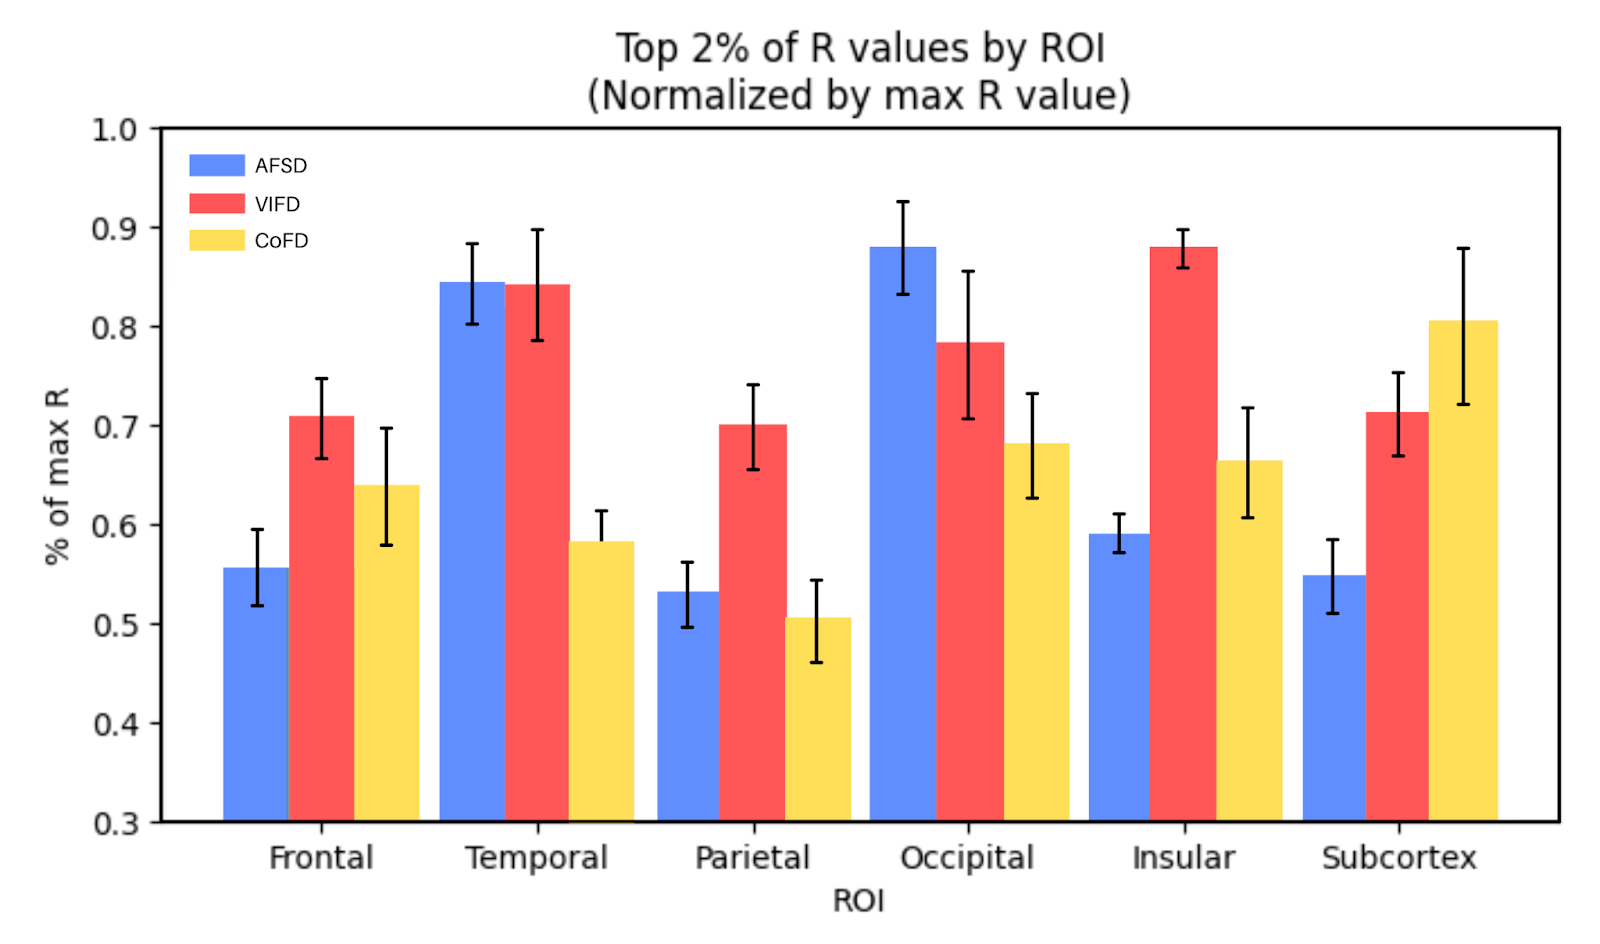


**Spatial distribution of fear-predictive regions**

These *r*-maps were further used to estimate the total amount of fear signal present in each brain region. Because Pearson correlation can be interpreted in terms of shared information (or shared variance, by taking the square), we approximated the amount of fear-related signal by estimating the mean and standard deviation of the top 2% of r-coefficients in each region of a coarse anatomically-based brain parcellation (derived by combining regions of the Harvard-Oxford atlas). These results are presented in Figure 7A. Furthermore, to ensure that the difference in signal was not driven by the amount of data available for each study, we recomputed the mean and standard deviation of the top 2% of r-coefficients across the whole brain for differently sized subsets of each dataset, starting at 30 observations and incrementing upwards. While the mean r-coefficients decreased slightly with the subset size in all datasets, the overall ranking remained consistent.

To further investigate the spatial distribution of fear-predictive regions, Figure 7A shows the top 2% of brain regions ranked by correlation strength (R values) for each dataset. AFSD showed the most extensive distribution of highly predictive regions, with peak activations in the occipital, temporal, insular and frontal regions. Furthermore, to assess the impact of dataset size on these findings, we examined the stability of the top 2% regions as a function of the number of data points per dataset. Figure 7B presents the top 2% of regions ranked by participant count, showing that AFSD exhibits a stronger signal than the other two datasets, even after matching for the number of data points.


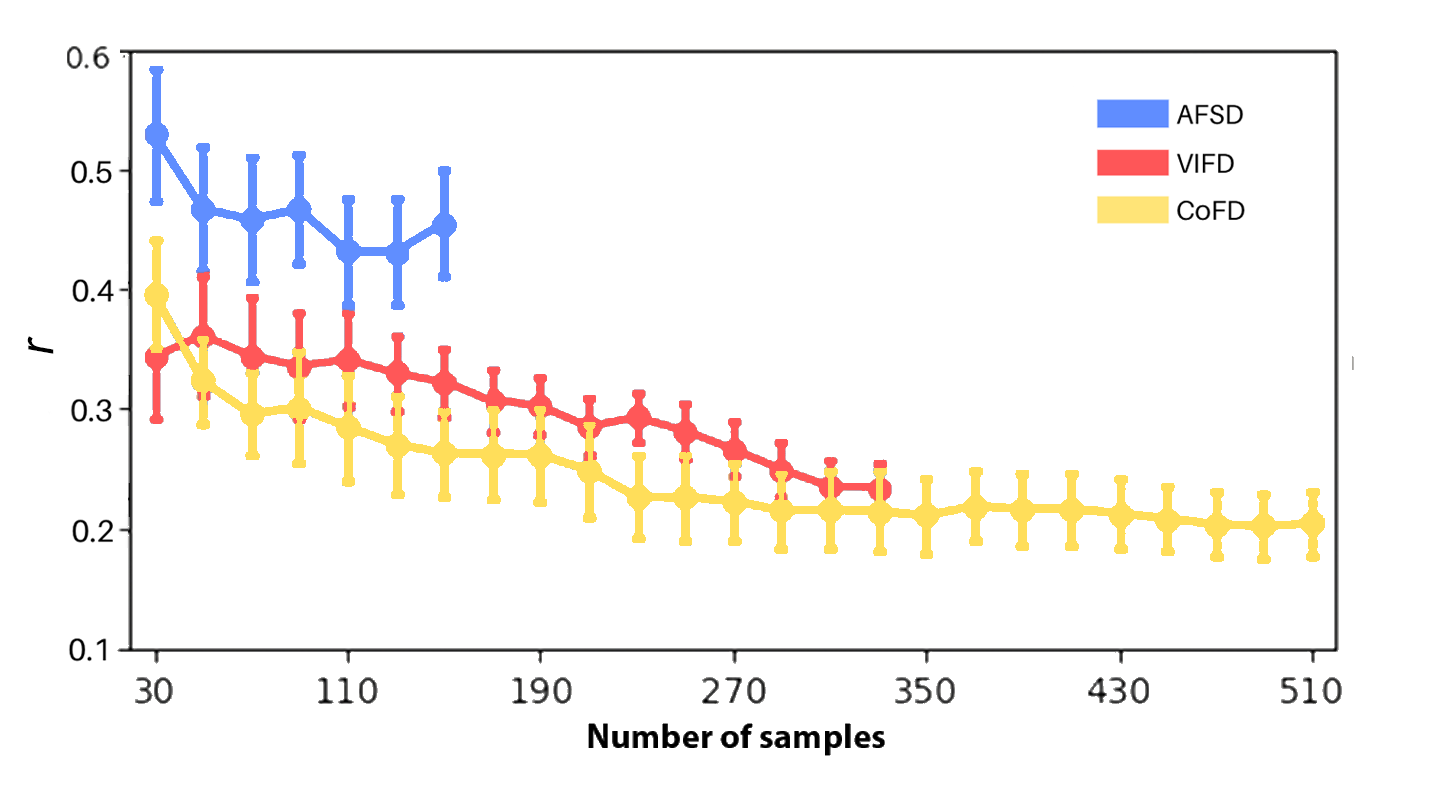


**Figure S5. AFSD demonstrates more robust and consistent neural representations.** Spatial distribution of the top 2% of brain regions most predictive of subjective fear, identified by their correlation strength (R values). Regions ranked by the consistency of their predictive power, measured as the number of participants for whom the region was among the most predictive. This analysis confirms that the AFSD neural decoder is not only stronger but also more consistently expressed across individuals than VIFD and CoFD.

**Table S4 : IRM Parameters**

| **Parameters** | **AFSD** | **VIFD** | **CoFD** | **Potential impact** |
| --- | --- | --- | --- | --- |
| **Scanner** | Siemens 3T Prisma, Siemens 3T Verio | GE Discovery MR750 3T | Siemens 3T MAGNETOM Prisma | - |
| **Séquence fonctionnelle** | EPI T2* | EPI T2* | Interleaved multiband sequence | - |
| **TR (ms)** | 2000 | 2000 | 867 | - |
| **TE (ms)** | 30 | 30 | 20 | - |
| **Voxel size (mm³)** | 3 × 3 × 3.5 | 3.125 × 3.125 × 3.8 | 3 x 3 x 3 | Slightly different |
| **FOV (mm)** | 192 × 192 | 200 × 200 | 220 x 220 | VIFD has a wider brain coverage |
| **Matrix size** | 64 × 64 | 64 × 64 | n/a |  |
| **Slice thickness (mm)** | 3.5 | 3.8 | 3 | Thinner thickness for AFSD |
| **Slice gap (mm)** | 0 | 0 | n/a | - |
| **Flip angle (°)** | 80 | 90 | 58 | Contrast BOLD slightly different |
| **Nombre de slice** | 33 | 36 | 51 | Brain coverage different |

**Regional specificity of fear prediction within each dataset**

Region-by-region analyses revealed distinct spatial patterns of predictive performance across the three datasets (Figure 5, Table S6). AFSD demonstrated the broadest cortical representation, with significant brain-behaviour correlations in 148 regions (r = 0.217–0.640, FDR-corrected p < 0.05), predominantly localized to posterior visual and temporal cortices (Figure 5B). The strongest correlations were observed in visual processing areas (left middle occipital gyrus: r = 0.640; left medial superior occipital gyrus: r = 0.573), temporal regions (left extreme lateroventral area 37 of the inferior temporal gyrus: r = 0.579), and limbic structures (right lateral amygdala: r = 0.576; left medial area 7 of the precuneus: r = 0.589).

VIFD showed more moderate but widespread correlations across 124 regions (r = 0.155–0.333), with a more distributed spatial pattern that emphasized prefrontal and limbic involvement (Figure 5C). Top predictive regions included prefrontal cortex (right medial area 9 of the superior frontal gyrus: r = 0.333), anterior cingulate (bilateral pregenual area 32: left r = 0.311, right r = 0.282), and temporal cortex (left extreme lateroventral area 37 of the inferior temporal gyrus: r = 0.305; bilateral auditory cortex TE1.0/TE1.2: left r = 0.301, right r = 0.262).

CoFD exhibited the most restricted pattern, with significant correlations in 47 regions (r = 0.136–0.288), concentrated in the medial frontal and limbic circuits (Figure 5D). Strongest correlations were found in medial frontal cortex (left medial area 6 of the superior frontal gyrus: r = 0.288), cingulate gyrus (right caudodorsal area 24: r = 0.261), orbitofrontal regions (right lateral area 10 of the middle frontal gyrus: r = 0.256; right lateral area 11 of the orbital gyrus: r = 0.257), and limbic structures (left ventral agranular insula: r = 0.236).

**Table S5. ROI Correlation for Each Dataset**

| **Lobe** | **Gyrus** | **Left and Right Hemisphere** | **Label ID.L** | **Label ID.R** | **Anatomical and modified Cyto-architectonic descriptions** | **lh.MNI(X,Y,Z)** | **rh.MNI(X,Y,Z)** | **AFSD (n=31)** | | **VIFD (n=67)** | | **CoFD (n=153)** | |
| --- | --- | --- | --- | --- | --- | --- | --- | --- | --- | --- | --- | --- | --- |
| r | p | r | p | r | p |
| Frontal Lobe | SFG, Superior Frontal Gyrus | SFG_L(R)_7_1 | 1 |  | *A8m, medial area 8* | -5 ,15, 54 | 7, 16, 54 | - | - | 0,182 | 0,001 | 0,199 | < 0.001 |
| SFG_L(R)_7_1 |  | 2 | *A8m, medial area 8* | -5 ,15, 54 | 7, 16, 54 | 0,283 | < 0.001 | 0,185 | 0,001 | 0,145 | 0,001 |
| SFG_L(R)_7_2 | 3 |  | *A8dl, dorsolateral area 8* | -18, 24, 53 | 22, 26, 51 | 0,275 | < 0.001 | - | - | - | - |
| SFG_L(R)_7_2 |  | 4 | *A8dl, dorsolateral area 8* |  |  | 0,401 | < 0.001 | - | - | - | - |
| SFG_L(R)_7_3 |  | 6 | *A9l, lateral area 9* | -11, 49, 40 | 13, 48, 40 | 0,270 | < 0.001 | 0,212 | < 0.001 | 0,155 | < 0.001 |
| SFG_L(R)_7_4 | 7 |  | *A6dl, dorsolateral area 6* | -18, -1, 65 | 20, 4, 64 | - | - | - | - | 0,140 | 0,001 |
| SFG_L(R)_7_4 |  | 8 | *A6dl, dorsolateral area 6* | -18, -1, 65 | 20, 4, 64 | - | - | 0,218 | < 0.001 | - | - |
| SFG_L(R)_7_5 | 9 |  | *A6m, medial area 6* | -6, -5, 58 | 7, -4, 60 | - | - | 0,186 | 0,001 | 0,288 | < 0.001 |
| SFG_L(R)_7_5 |  | 10 | *A6m, medial area 6* | -6, -5, 58 | 7, -4, 60 | 0,224 | 0,004 | - | - | - | - |
| SFG_L(R)_7_6 | 11 |  | *A9m,medial area 9* | -5, 36, 38 | 6, 38, 35 | 0,374 | < 0.001 | 0,255 | < 0.001 | - | - |
| SFG_L(R)_7_6 |  | 12 | *A9m,medial area 9* |  |  | 0,319 | < 0.001 | 0,333 | < 0.001 | - | - |
| SFG_L(R)_7_7 | 13 |  | *A10m, medial area 10* | -8, 56, 15 | 8, 58, 13 | 0,354 | < 0.001 | 0,162 | 0,003 | - | - |
| SFG_L(R)_7_7 |  | 14 | *A10m, medial area 10* | -8, 56, 15 | 8, 58, 13 | - | - | 0,198 | < 0.001 | - | - |
| MFG, Middle Frontal Gyrus | MFG_L(R)_7_1 |  | 16 | *A9/46d, dorsal area 9/46* | -27, 43, 31 | 30, 37, 36 | - | - | - | - | 0,147 | 0,001 |
| MFG_L(R)_7_2 | 17 |  | *IFJ, inferior frontal junction* | -42, 13, 36 | 42, 11, 39 | 0,460 | < 0.001 | - | - | - | - |
| MFG_L(R)_7_2 |  | 18 | *IFJ, inferior frontal junction* | -42, 13, 36 | 42, 11, 39 | - | - | 0,239 | < 0.001 | - | - |
| MFG_L(R)_7_3 |  | 20 | *A46, area 46* | -28, 56, 12 | 28, 55, 17 | - | - | 0,190 | < 0.001 | 0,209 | < 0.001 |
| MFG_L(R)_7_4 | 21 |  | *A9/46v, ventral area 9/46* | -41, 41, 16 | 42, 44, 14 | 0,388 | < 0.001 | - | - | - | - |
| MFG_L(R)_7_4 |  | 22 | *A9/46v, ventral area 9/46* | -41, 41, 16 | 42, 44, 14 | 0,435 | < 0.001 | - | - | - | - |
| MFG_L(R)_7_5 | 23 |  | *A8vl, ventrolateral area 8* | -33, 23, 45 | 42, 27, 39 | 0,336 | < 0.001 | - | - | - | - |
| MFG_L(R)_7_5 |  | 24 | *A8vl, ventrolateral area 8* | -33, 23, 45 | 42, 27, 39 | 0,386 | < 0.001 | 0,166 | 0,002 | - | - |
| MFG_L(R)_7_6 | 25 |  | *A6vl, ventrolateral area 6* | -32, 4, 55 | 34, 8, 54 | 0,364 | < 0.001 | - | - | - | - |
| MFG_L(R)_7_6 |  | 26 | *A6vl, ventrolateral area 6* | -32, 4, 55 | 34, 8, 54 | - | - | 0,181 | 0,001 | - | - |
| MFG_L(R)_7_7 | 27 |  | *A10l, lateral area10* | -26, 60, -6 | 25, 61, -4 | 0,355 | < 0.001 | - | - | - | - |
| MFG_L(R)_7_7 |  | 28 | *A10l, lateral area10* | -26, 60, -6 | 25, 61, -4 | 0,259 | 0,001 | - | - | 0,256 | < 0.001 |
| IFG, Inferior Frontal Gyrus | IFG_L(R)_6_1 | 29 |  | *A44d,dorsal area 44* | -46, 13, 24 | 45, 16, 25 | 0,291 | < 0.001 | - | - | - | - |
| IFG_L(R)_6_1 |  | 30 | *A44d,dorsal area 44* | -46, 13, 24 | 45, 16, 25 | 0,361 | < 0.001 | 0,227 | < 0.001 | - | - |
| IFG_L(R)_6_2 | 31 |  | *IFS, inferior frontal sulcus* | -47, 32, 14 | 48, 35, 13 | 0,426 | < 0.001 | - | - | - | - |
| IFG_L(R)_6_2 |  | 32 | *IFS, inferior frontal sulcus* | -47, 32, 14 | 48, 35, 13 | 0,284 | < 0.001 | 0,186 | 0,001 | - | - |
| IFG_L(R)_6_3 | 33 |  | *A45c, caudal area 45* | -53, 23, 11 | 54, 24, 12 | 0,269 | 0,001 | 0,159 | 0,004 | - | - |
| IFG_L(R)_6_3 |  | 34 | *A45c, caudal area 45* | -53, 23, 11 | 54, 24, 12 | - | - | 0,180 | 0,001 | - | - |
| IFG_L(R)_6_4 | 35 |  | *A45r, rostral area 45* | -49, 36, -3 | 51, 36, -1 | 0,230 | 0,003 | 0,210 | < 0.001 | 0,159 | < 0.001 |
| IFG_L(R)_6_4 |  | 36 | *A45r, rostral area 45* | -49, 36, -3 | 51, 36, -1 | 0,217 | 0,005 | 0,260 | < 0.001 | - | - |
| IFG_L(R)_6_5 | 37 |  | *A44op, opercular area 44* | -39, 23, 4 | 42, 22, 3 | 0,222 | 0,004 | 0,169 | 0,002 | - | - |
| IFG_L(R)_6_5 |  | 38 | *A44op, opercular area 44* | -39, 23, 4 | 42, 22, 3 | - | - | 0,251 | < 0.001 | - | - |
| IFG_L(R)_6_6 | 39 |  | *A44v, ventral area 44* | -52, 13, 6 | 54, 14, 11 | 0,232 | 0,003 | 0,160 | 0,003 | 0,153 | < 0.001 |
| OrG, Orbital Gyrus | OrG_L(R)_6_1 | 41 |  | *A14m, medial area 14* | -7, 54, -7 | 6, 47, -7 | - | - | 0,175 | 0,001 | - | - |
| OrG_L(R)_6_1 |  | 42 | *A14m, medial area 14* | -7, 54, -7 | 6, 47, -7 | - | - | 0,168 | 0,002 | 0,228 | < 0.001 |
| OrG_L(R)_6_2 | 43 |  | *A12/47o, orbital area 12/47* | -36, 33, -16 | 40, 39, -14 | - | - | - | - | 0,189 | < 0.001 |
| OrG_L(R)_6_2 |  | 44 | *A12/47o, orbital area 12/47* | -36, 33, -16 | 40, 39, -14 | 0,368 | < 0.001 | 0,253 | < 0.001 | - | - |
| OrG_L(R)_6_3 | 45 |  | *A11l, lateral area 11* | -23, 38, -18 | 23, 36, -18 | 0,301 | < 0.001 | - | - | 0,230 | < 0.001 |
| OrG_L(R)_6_3 |  | 46 | *A11l, lateral area 11* | -23, 38, -18 | 23, 36, -18 | 0,322 | < 0.001 | 0,228 | < 0.001 | 0,257 | < 0.001 |
| OrG_L(R)_6_4 | 47 | 48 | *A11m, medial area 11* | -6, 52, -19 | 6, 57, -16 | - | - | - | - | - | - |
| OrG_L(R)_6_5 | 49 |  | *A13, area 13* | -10, 18, -19 | 9, 20, -19 | 0,462 | < 0.001 | 0,227 | < 0.001 | - | - |
| OrG_L(R)_6_5 |  | 50 | *A13, area 13* | -10, 18, -19 | 9, 20, -19 | 0,312 | < 0.001 | 0,169 | 0,002 | - | - |
| OrG_L(R)_6_6 | 51 |  | *A12/47l, lateral area 12/47* | -41, 32, -9 | 42, 31, -9 | 0,239 | 0,002 | - | - | 0,140 | 0,001 |
| OrG_L(R)_6_6 |  | 52 | *A12/47l, lateral area 12/47* | -41, 32, -9 | 42, 31, -9 | 0,343 | < 0.001 | 0,263 | < 0.001 | 0,204 | < 0.001 |
| PrG, Precentral Gyrus | PrG_L(R)_6_1 | 53 |  | *A4hf, area 4(head and face region)* | -49, -8, 39 | 55, -2, 33 | 0,276 | < 0.001 | 0,208 | < 0.001 | - | - |
| PrG_L(R)_6_2 | 55 |  | *A6cdl, caudal dorsolateral area 6* | -32, -9, 58 | 33, -7, 57 | - | - | 0,200 | < 0.001 | 0,150 | 0,001 |
| PrG_L(R)_6_2 |  | 56 | *A6cdl, caudal dorsolateral area 6* | -32, -9, 58 | 33, -7, 57 | - | - | 0,213 | < 0.001 | - | - |
| PrG_L(R)_6_3 | 57 |  | *A4ul, area 4(upper limb region)* | -26, -25, 63 | 34, -19, 59 | 0,274 | < 0.001 | 0,196 | < 0.001 | - | - |
| PrG_L(R)_6_4 | 59 |  | *A4t, area 4(trunk region)* | -13, -20, 73 | 15, -22, 71 | 0,252 | 0,001 | 0,160 | 0,003 | - | - |
| PrG_L(R)_6_4 |  | 60 | *A4t, area 4(trunk region)* | -13, -20, 73 | 15, -22, 71 | - | - | 0,182 | 0,001 | 0,146 | 0,001 |
| PrG_L(R)_6_5 | 61 |  | *A4tl, area 4(tongue and larynx region)* | -52, 0, 8 | 54, 4, 9 | 0,256 | 0,001 | - | - | - | - |
| PrG_L(R)_6_6 | 63 |  | *A6cvl, caudal ventrolateral area 6* | -49, 5, 30 | 51, 7, 30 | - | - | 0,188 | 0,001 | 0,160 | < 0.001 |
|  | PrG_L(R)_6_6 |  | 64 | *A6cvl, caudal ventrolateral area 6* | -49, 5, 30 | 51, 7, 30 | - | - | 0,281 | < 0.001 | - | - |
| PCL, Paracentral Lobule | PCL_L(R)_2_1 | 65 |  | *A1/2/3ll, area1/2/3 (lower limb region)* | -8, -38, 58 | 10, -34, 54 | - | - | 0,225 | < 0.001 | - | - |
| PCL_L(R)_2_1 |  | 66 | *A1/2/3ll, area1/2/3 (lower limb region)* | -8, -38, 58 | 10, -34, 54 | 0,255 | 0,001 | 0,205 | < 0.001 | 0,178 | < 0.001 |
| PCL_L(R)_2_2 | 67 |  | *A4ll, area 4, (lower limb region)* | -4, -23, 61 | 5, -21, 61 | - | - | 0,266 | < 0.001 | 0,201 | < 0.001 |
| PCL_L(R)_2_2 |  | 68 | *A4ll, area 4, (lower limb region)* | -4, -23, 61 | 5, -21, 61 | 0,315 | < 0.001 | 0,194 | < 0.001 | - | - |
| Temporal Lobe | STG, Superior Temporal Gyrus | STG_L(R)_6_1 |  | 70 | *A38m, medial area 38* | -32, 14, -34 | 31, 15, -34 | 0,229 | 0,003 | - | - | - | - |
| STG_L(R)_6_2 |  | 72 | *A41/42, area 41/42* | -54, -32, 12 | 54, -24, 11 | 0,249 | 0,001 | 0,217 | < 0.001 | - | - |
| STG_L(R)_6_3 | 73 |  | *TE1.0 and TE1.2* | -50, -11, 1 | 51, -4, -1 | 0,300 | < 0.001 | 0,301 | < 0.001 | - | - |
| STG_L(R)_6_3 |  | 74 | *TE1.0 and TE1.2* | -50, -11, 1 | 51, -4, -1 | 0,336 | < 0.001 | 0,262 | < 0.001 | - | - |
| STG_L(R)_6_4 | 75 |  | *A22c, caudal area 22* | -62, -33, 7 | 66, -20, 6 | 0,258 | 0,001 | 0,275 | < 0.001 | - | - |
| STG_L(R)_6_4 |  | 76 | *A22c, caudal area 22* | -62, -33, 7 | 66, -20, 6 | 0,254 | 0,001 | - | - | - | - |
| STG_L(R)_6_5 | 77 |  | *A38l, lateral area 38* | -45, 11, -20 | 47, 12, -20 | 0,239 | 0,002 | 0,175 | 0,001 | - | - |
| STG_L(R)_6_5 |  | 78 | *A38l, lateral area 38* | -45, 11, -20 | 47, 12, -20 | 0,225 | 0,004 | - | - | - | - |
| STG_L(R)_6_6 | 79 |  | *A22r, rostral area 22* | -55, -3, -10 | 56, -12, -5 | 0,360 | < 0.001 | 0,176 | 0,001 | - | - |
| STG_L(R)_6_6 |  | 80 | *A22r, rostral area 22* | -55, -3, -10 | 56, -12, -5 | 0,233 | 0,003 | 0,246 | < 0.001 | - | - |
| MTG, Middle Temporal Gyrus | MTG_L(R)_4_1 | 81 |  | *A21c, caudal area 21* | -65, -30, -12 | 65, -29, -13 | 0,420 | < 0.001 | - | - | - | - |
| MTG_L(R)_4_1 |  | 82 | *A21c, caudal area 21* | -65, -30, -12 | 65, -29, -13 | 0,216 | 0,006 | 0,288 | < 0.001 | - | - |
| MTG_L(R)_4_2 | 83 |  | *A21r, rostral area 21* | -53, 2, -30 | 51, 6, -32 | 0,240 | 0,002 | - | - | - | - |
| MTG_L(R)_4_3 | 85 |  | *A37dl, dorsolateral area37* | -59, -58, 4 | 60, -53, 3 | 0,532 | < 0.001 | 0,275 | < 0.001 | - | - |
| MTG_L(R)_4_3 |  | 86 | *A37dl, dorsolateral area37* | -59, -58, 4 | 60, -53, 3 | 0,445 | < 0.001 | 0,290 | < 0.001 | - | - |
| MTG_L(R)_4_4 | 87 |  | *aSTS, anterior superior temporal sulcus* | -58, -20, -9 | 58, -16, -10 | 0,231 | 0,003 | - | - | - | - |
|  | MTG_L(R)_4_4 |  | 88 | *aSTS, anterior superior temporal sulcus* | -58, -20, -9 | 58, -16, -10 | 0,219 | 0,005 | 0,207 | < 0.001 | - | - |
| ITG, Inferior Temporal Gyrus | ITG_L(R)_7_1 | 89 |  | *A20iv, intermediate ventral area 20* | -45, -26, -27 | 46, -14, -33 | 0,422 | < 0.001 | - | - | - | - |
| ITG_L(R)_7_1 |  | 90 | *A20iv, intermediate ventral area 20* | -45, -26, -27 | 46, -14, -33 | - | - | - | - | 0,184 | < 0.001 |
| ITG_L(R)_7_2 | 91 |  | *A37elv, extreme lateroventral area37* | -51, -57, -15 | 53, -52, -18 | 0,579 | < 0.001 | 0,305 | < 0.001 | - | - |
| ITG_L(R)_7_2 |  | 92 | *A37elv, extreme lateroventral area37* | -51, -57, -15 | 53, -52, -18 | - | - | 0,289 | < 0.001 | - | - |
| ITG_L(R)_7_3 |  | 94 | *A20r, rostral area 20* | -43, -2, -41 | 40, 0, -43 | 0,217 | 0,005 | - | - | - | - |
| ITG_L(R)_7_4 | 97 |  | *A20il, intermediate lateral area 20* | -56, -16, -28 | 55, -11, -32 | 0,406 | < 0.001 | 0,275 | < 0.001 | - | - |
| ITG_L(R)_7_5 |  | 98 | *A37vl, ventrolateral area 37* | -55, -60, -6 | 54, -57, -8 | 0,264 | 0,001 | 0,266 | < 0.001 | - | - |
| ITG_L(R)_7_6 | 99 |  | *A20cl, caudolateral of area 20* | -59, -42, -16 | 61, -40, -17 | 0,499 | < 0.001 | 0,198 | < 0.001 | - | - |
| ITG_L(R)_7_6 |  | 100 | *A20cl, caudolateral of area 20* | -59, -42, -16 | 61, -40, -17 | 0,292 | < 0.001 | 0,237 | < 0.001 |  |  |
| ITG_L(R)_7_7 | 101 |  | *A20cv, caudoventral of area 20* | -55, -31, -27 | 54, -31, -26 | 0,342 | < 0.001 | 0,233 | < 0.001 | 0,181 | < 0.001 |
|  | ITG_L(R)_7_7 |  | 102 | *A20cv, caudoventral of area 20* | -55, -31, -27 | 54, -31, -26 | - | - | - | - | 0,136 | 0,002 |
| FuG, Fusiform Gyrus | FuG_L(R)_3_1 | 103 |  | *A20rv, rostroventral area 20* | -33, -16, -32 | 33, -15, -34 | 0,590 | < 0.001 | - | - | - | - |
| FuG_L(R)_3_1 |  | 104 | *A20rv, rostroventral area 20* | -33, -16, -32 | 33, -15, -34 | 0,418 | < 0.001 | 0,179 | 0,001 | - | - |
| FuG_L(R)_3_2 | 105 |  | *A37mv, medioventral area37* | -31, -64, -14 | 31, -62, -14 | 0,500 | < 0.001 | - | - | - | - |
| FuG_L(R)_3_2 |  | 106 | *A37mv, medioventral area37* | -31, -64, -14 | 31, -62, -14 | 0,516 | < 0.001 | 0,215 | < 0.001 | 0,170 | < 0.001 |
| FuG_L(R)_3_3 | 107 |  | *A37lv, lateroventral area37* | -42, -51, -17 | 43, -49, -19 | 0,542 | < 0.001 | 0,241 | < 0.001 | - | - |
| FuG_L(R)_3_3 |  | 108 | *A37lv, lateroventral area37* | -42, -51, -17 | 43, -49, -19 | 0,337 | < 0.001 | 0,287 | < 0.001 | 0,166 | < 0.001 |
| PhG, Parahippocampal Gyrus | PhG_L(R)_6_1 |  | 110 | *A35/36r, rostral area 35/36* | -27, -7, -34 | 28, -8, -33 | 0,230 | 0,003 | - | - | - | - |
| PhG_L(R)_6_2 | 111 |  | *A35/36c, caudal area 35/36* | -25, -25, -26 | 26, -23, -27 | 0,242 | 0,002 | - | - | - | - |
| PhG_L(R)_6_2 |  | 112 | *A35/36c, caudal area 35/36* | -25, -25, -26 | 26, -23, -27 | 0,490 | < 0.001 | - | - | - | - |
| PhG_L(R)_6_3 | 113 |  | *TL, area TL (lateral PPHC, posterior parahippocampal gyrus)* | -28, -32, -18 | 30, -30, -18 | 0,443 | < 0.001 | 0,220 | < 0.001 | 0,192 | < 0.001 |
| PhG_L(R)_6_3 |  | 114 | *TL, area TL (lateral PPHC, posterior parahippocampal gyrus)* | -28, -32, -18 | 30, -30, -18 | 0,445 | < 0.001 | 0,220 | < 0.001 | - | - |
| PhG_L(R)_6_4 |  | 116 | *A28/34, area 28/34 (EC, entorhinal cortex)* | -19, -12, -30 | 19, -10, -30 | - | - | 0,174 | 0,001 | - | - |
| PhG_L(R)_6_5 | 117 |  | *TI, area TI(temporal agranular insular cortex)* | -23, 2, -32 | 22, 1, -36 | 0,383 | < 0.001 | 0,180 | 0,001 | - | - |
| PhG_L(R)_6_6 | 119 |  | *TH, area TH (medial PPHC)* | -17, -39, -10 | 19, -36, -11 | 0,397 | < 0.001 | 0,208 | < 0.001 | - | - |
| PhG_L(R)_6_6 |  | 120 | *TH, area TH (medial PPHC)* | -17, -39, -10 | 19, -36, -11 | 0,488 | < 0.001 | 0,207 | < 0.001 | 0,141 | 0,001 |
| pSTS, posterior Superior Temporal Sulcus | pSTS_L(R)_2_1 | 121 |  | *rpSTS, rostroposterior superior temporal sulcus* | -54, -40, 4 | 53, -37, 3 | 0,389 | < 0.001 | - | - | - | - |
| pSTS_L(R)_2_1 |  | 122 | *rpSTS, rostroposterior superior temporal sulcus* | -54, -40, 4 | 53, -37, 3 | - | - | 0,185 | 0,001 | 0,155 | < 0.001 |
| pSTS_L(R)_2_2 | 123 |  | *cpSTS, caudoposterior superior temporal sulcus* | -52, -50, 11 | 57, -40, 12 | 0,549 | < 0.001 | 0,162 | 0,003 | - | - |
| pSTS_L(R)_2_2 |  | 124 | *cpSTS, caudoposterior superior temporal sulcus* | -52, -50, 11 | 57, -40, 12 | 0,295 | < 0.001 | 0,239 | < 0.001 | - | - |
| Parietal Lobe | SPL, Superior Parietal Lobule | SPL_L(R)_5_1 | 125 |  | *A7r, rostral area 7* | -16, -60, 63 | 19, -57, 65 | 0,363 | < 0.001 | - | - | - | - |
| SPL_L(R)_5_1 |  | 126 | *A7r, rostral area 7* | -16, -60, 63 | 19, -57, 65 | - | - | 0,164 | 0,003 | - | - |
| SPL_L(R)_5_2 | 127 |  | *A7c, caudal area 7* | -15, -71, 52 | 19, -69, 54 | 0,327 | < 0.001 | 0,164 | 0,003 | - | - |
| SPL_L(R)_5_3 | 129 |  | *A5l, lateral area 5* | -33, -47, 50 | 35, -42, 54 | 0,373 | < 0.001 | - | - | - | - |
| SPL_L(R)_5_3 |  | 130 | *A5l, lateral area 5* | -33, -47, 50 | 35, -42, 54 | 0,327 | < 0.001 | - | - | - | - |
| SPL_L(R)_5_4 | 131 |  | *A7pc, postcentral area 7* | -22, -47, 65 | 23, -43, 67 | 0,375 | < 0.001 | - | - | - | - |
| SPL_L(R)_5_4 |  | 132 | *A7pc, postcentral area 7* | -22, -47, 65 | 23, -43, 67 | 0,288 | < 0.001 | 0,160 | 0,003 | - | - |
| SPL_L(R)_5_5 | 133 |  | *A7ip, intraparietal area 7(hIP3)* | -27, -59, 54 | 31, -54, 53 | 0,283 | < 0.001 | - | - | - | - |
| IPL, Inferior Parietal Lobule | IPL_L(R)_6_1 | 135 |  | *A39c, caudal area 39(PGp)* | -34, -80, 29 | 45, -71, 20 | 0,556 | < 0.001 | - | - | - | - |
| IPL_L(R)_6_1 |  | 136 | *A39c, caudal area 39(PGp)* | -34, -80, 29 | 45, -71, 20 | 0,536 | < 0.001 | 0,217 | < 0.001 | - | - |
| IPL_L(R)_6_2 | 137 |  | *A39rd, rostrodorsal area 39(Hip3)* | -38, -61, 46 | 39, -65, 44 | 0,269 | 0,001 | - | - | - | - |
| IPL_L(R)_6_2 |  | 138 | *A39rd, rostrodorsal area 39(Hip3)* | -38, -61, 46 | 39, -65, 44 | 0,303 | < 0.001 | - | - | - | - |
| IPL_L(R)_6_3 | 139 | 140 | *A40rd, rostrodorsal area 40(PFt)* | -51, -33, 42 | 47, -35, 45 | - | - | - | - | - | - |
| IPL_L(R)_6_4 | 141 |  | *A40c, caudal area 40(PFm)* | -56, -49, 38 | 57, -44, 38 | - | - | - | - | -0,157 | < 0.001 |
| IPL_L(R)_6_5 | 143 |  | *A39rv, rostroventral area 39(PGa)* | -47, -65, 26 | 53, -54, 25 | 0,225 | 0,004 | - | - | - | - |
| IPL_L(R)_6_5 |  | 144 | *A39rv, rostroventral area 39(PGa)* | -47, -65, 26 | 53, -54, 25 | 0,217 | 0,005 | 0,182 | 0,001 | - | - |
| IPL_L(R)_6_6 | 145 |  | *A40rv, rostroventral area 40(PFop)* | -53, -31, 23 | 55, -26, 26 | - | - | 0,200 | < 0.001 | - | - |
| Pcun, Precuneus | PCun_L(R)_4_1 | 147 |  | *A7m, medial area 7(PEp)* | -5, -63, 51 | 6, -65, 51 | 0,589 | < 0.001 | - | - | 0,196 | < 0.001 |
| PCun_L(R)_4_1 |  | 148 | *A7m, medial area 7(PEp)* | -5, -63, 51 | 6, -65, 51 | - | - | 0,203 | < 0.001 | - | - |
| PCun_L(R)_4_2 | 149 |  | *A5m, medial area 5(PEm)* | -8, -47, 57 | 7, -47, 58 | 0,393 | < 0.001 | 0,234 | < 0.001 | 0,164 | < 0.001 |
| PCun_L(R)_4_2 |  | 150 | *A5m, medial area 5(PEm)* | -8, -47, 57 | 7, -47, 58 | 0,331 | < 0.001 | 0,205 | < 0.001 | 0,143 | 0,001 |
| PCun_L(R)_4_3 | 151 |  | *dmPOS, dorsomedial parietooccipital sulcus(PEr)* | -12, -67, 25 | 16, -64, 25 | 0,457 | < 0.001 | - | - | - | - |
| PCun_L(R)_4_3 |  | 152 | *dmPOS, dorsomedial parietooccipital sulcus(PEr)* | -12, -67, 25 | 16, -64, 25 | 0,368 | < 0.001 | 0,203 | < 0.001 | - | - |
| PCun_L(R)_4_4 | 153 |  | *A31, area 31 (Lc1)* | -6, -55, 34 | 6, -54, 35 | 0,376 | < 0.001 | 0,244 | < 0.001 | - | - |
| PCun_L(R)_4_4 |  | 154 | *A31, area 31 (Lc1)* | -6, -55, 34 | 6, -54, 35 | 0,351 | < 0.001 | 0,157 | 0,004 | 0,142 | 0,001 |
| PoG, Postcentral Gyrus | PoG_L(R)_4_1 | 155 |  | *A1/2/3ulhf, area 1/2/3(upper limb, head and face region)* | -50, -16, 43 | 50, -14, 44 | 0,265 | 0,001 | 0,269 | < 0.001 | - | - |
| PoG_L(R)_4_1 |  | 156 | *A1/2/3ulhf, area 1/2/3(upper limb, head and face region)* | -50, -16, 43 | 50, -14, 44 | - | - | - | - | 0,179 | < 0.001 |
| PoG_L(R)_4_2 | 157 |  | *A1/2/3tonIa, area 1/2/3(tongue and larynx region)* | -56, -14, 16 | 56, -10, 15 | 0,318 | < 0.001 | 0,177 | 0,001 | - | - |
| PoG_L(R)_4_3 | 159 |  | *A2, area 2* | -46, -30, 50 | 48, -24, 48 | 0,349 | < 0.001 | - | - | - | - |
| PoG_L(R)_4_3 |  | 160 | *A2, area 2* | -46, -30, 50 | 48, -24, 48 | - | - | 0,200 | < 0.001 | - | - |
| PoG_L(R)_4_4 | 161 |  | *A1/2/3tru, area1/2/3(trunk region)* | -21, -35, 68 | 20, -33, 69 | 0,338 | < 0.001 | - | - | 0,150 | 0,001 |
| PoG_L(R)_4_4 |  | 162 | *A1/2/3tru, area1/2/3(trunk region)* | -21, -35, 68 | 20, -33, 69 | - | - | 0,205 | < 0.001 | - | - |
| Insular Lobe | INS, Insular Gyrus | INS_L(R)_6_1 | 163 |  | *G, hypergranular insula* | -36, -20, 10 | 37, -18, 8 | - | - | 0,269 | < 0.001 | - | - |
| INS_L(R)_6_1 |  | 164 | *G, hypergranular insula* | -36, -20, 10 | 37, -18, 8 | - | - | 0,189 | 0,001 | - | - |
| INS_L(R)_6_2 | 165 |  | *vIa, ventral agranular insula* | -32, 14, -13 | 33, 14, -13 | 0,241 | 0,002 | 0,197 | < 0.001 | 0,236 | < 0.001 |
| INS_L(R)_6_2 |  | 166 | *vIa, ventral agranular insula* | -32, 14, -13 | 33, 14, -13 | 0,347 | < 0.001 | 0,171 | 0,002 | - | - |
| INS_L(R)_6_3 | 167 |  | *dIa, dorsal agranular insula* | -34, 18, 1 | 36, 18, 1 | 0,344 | < 0.001 | 0,238 | < 0.001 | - | - |
| INS_L(R)_6_3 |  | 168 | *dIa, dorsal agranular insula* | -34, 18, 1 | 36, 18, 1 | 0,224 | 0,004 | 0,238 | < 0.001 | - | - |
| INS_L(R)_6_4 | 169 |  | *vId/vIg, ventral dysgranular and granular insula* | -38, -4, -9 | 39, -2, -9 | 0,362 | < 0.001 | 0,163 | 0,003 | - | - |
| INS_L(R)_6_4 |  | 170 | *vId/vIg, ventral dysgranular and granular insula* | -38, -4, -9 | 39, -2, -9 | 0,289 | < 0.001 | 0,211 | < 0.001 | - | - |
| INS_L(R)_6_5 | 171 |  | *dIg, dorsal granular insula* | -38, -8, 8 | 39, -7, 8 | 0,447 | < 0.001 | 0,299 | < 0.001 | - | - |
| INS_L(R)_6_5 |  | 172 | *dIg, dorsal granular insula* | -38, -8, 8 | 39, -7, 8 | - | - | 0,295 | < 0.001 | - | - |
| INS_L(R)_6_6 | 173 |  | *dId, dorsal dysgranular insula* | -38, 5, 5 | 38, 5, 5 | 0,374 | < 0.001 | 0,185 | 0,001 | - | - |
| INS_L(R)_6_6 |  | 174 | *dId, dorsal dysgranular insula* | -38, 5, 5 | 38, 5, 5 | 0,375 | < 0.001 | 0,212 | < 0.001 | 0,142 | 0,001 |
| Limbic Lobe | CG, Cingulate Gyrus | CG_L(R)_7_1 | 175 |  | *A23d, dorsal area 23* | -4, -39, 31 | 4, -37, 32 | 0,419 | < 0.001 | 0,200 | < 0.001 | - | - |
| CG_L(R)_7_1 |  | 176 | *A23d, dorsal area 23* | -4, -39, 31 | 4, -37, 32 | 0,425 | < 0.001 | 0,251 | < 0.001 | - | - |
| CG_L(R)_7_2 | 177 |  | *A24rv, rostroventral area 24* | -3, 8, 25 | 5, 22, 12 | 0,355 | < 0.001 | 0,284 | < 0.001 | - | - |
| CG_L(R)_7_2 |  | 178 | *A24rv, rostroventral area 24* | -3, 8, 25 | 5, 22, 12 | 0,428 | < 0.001 | 0,220 | < 0.001 | - | - |
| CG_L(R)_7_3 | 179 |  | *A32p, pregenual area 32* | -6, 34, 21 | 5, 28, 27 | 0,386 | < 0.001 | 0,311 | < 0.001 | 0,161 | < 0.001 |
| CG_L(R)_7_3 |  | 180 | *A32p, pregenual area 32* | -6, 34, 21 | 5, 28, 27 | 0,277 | < 0.001 | 0,282 | < 0.001 | - | - |
| CG_L(R)_7_4 | 181 |  | *A23v, ventral area 23* | -8, -47, 10 | 9, -44, 11 | - | - | - | - | 0,173 | < 0.001 |
| CG_L(R)_7_4 |  | 182 | *A23v, ventral area 23* | -8, -47, 10 | 9, -44, 11 | 0,413 | < 0.001 | 0,232 | < 0.001 | - | - |
| CG_L(R)_7_5 | 183 |  | *A24cd, caudodorsal area 24* | -5, 7, 37 | 4, 6, 38 | 0,260 | 0,001 | 0,250 | < 0.001 | - | - |
| CG_L(R)_7_5 |  | 184 | *A24cd, caudodorsal area 24* | -5, 7, 37 | 4, 6, 38 | - | - | 0,210 | < 0.001 | 0,261 | < 0.001 |
| CG_L(R)_7_6 | 185 |  | *A23c, caudal area 23* | -7, -23, 41 | 6, -20, 40 | - | - | 0,221 | < 0.001 | - | - |
| CG_L(R)_7_6 |  | 186 | *A23c, caudal area 23* | -7, -23, 41 | 6, -20, 40 | - | - | 0,196 | < 0.001 | - | - |
| CG_L(R)_7_7 | 187 |  | *A32sg, subgenual area 32* | -4, 39, -2 | 5, 41, 6 | 0,240 | 0,002 | 0,207 | < 0.001 | - | - |
|  |  | CG_L(R)_7_7 |  | 188 | *A32sg, subgenual area 32* | -4, 39, -2 | 5, 41, 6 | - | - | 0,209 | < 0.001 | - | - |
| Occipital Lobe | MVOcC*,* MedioVentral Occipital Cortex | MVOcC _L(R)_5_1 | 189 |  | *cLinG, caudal lingual gyrus* | -11, -82, -11 | 10, -85, -9 | 0,487 | < 0.001 | - | - | - | - |
| MVOcC _L(R)_5_1 |  | 190 | *cLinG, caudal lingual gyrus* | -11, -82, -11 | 10, -85, -9 | 0,455 | < 0.001 | 0,173 | 0,002 | - | - |
| MVOcC _L(R)_5_2 | 191 |  | *rCunG, rostral cuneus gyrus* | -5, -81, 10 | 7, -76, 11 | 0,397 | < 0.001 | - | - | - | - |
| MVOcC _L(R)_5_2 |  | 192 | *rCunG, rostral cuneus gyrus* | -5, -81, 10 | 7, -76, 11 | 0,565 | < 0.001 | - | - | - | - |
| MVOcC _L(R)_5_3 | 193 |  | *cCunG, caudal cuneus gyrus* | -6, -94, 1 | 8, -90, 12 | 0,451 | < 0.001 | - | - | - | - |
| MVOcC _L(R)_5_3 |  | 194 | *cCunG, caudal cuneus gyrus* | -6, -94, 1 | 8, -90, 12 | 0,430 | < 0.001 | - | - | - | - |
| MVOcC _L(R)_5_4 | 195 |  | *rLinG, rostral lingual gyrus* | -17, -60, -6 | 18, -60, -7 | 0,515 | < 0.001 | - | - | - | - |
| MVOcC _L(R)_5_4 |  | 196 | *rLinG, rostral lingual gyrus* | -17, -60, -6 | 18, -60, -7 | 0,486 | < 0.001 | 0,159 | 0,004 | 0,202 | < 0.001 |
| MVOcC _L(R)_5_5 | 197 |  | *vmPOS,ventromedial parietooccipital sulcus* | -13, -68, 12 | 15, -63, 12 | 0,531 | < 0.001 | - | - | - | - |
| MVOcC _L(R)_5_5 |  | 198 | *vmPOS,ventromedial parietooccipital sulcus* | -13, -68, 12 | 15, -63, 12 | 0,465 | < 0.001 | 0,155 | 0,005 | 0,189 | < 0.001 |
| LOcC, lateral Occipital Cortex | LOcC_L(R)_4_1 | 199 |  | *mOccG, middle occipital gyrus* | -31, -89, 11 | 34, -86, 11 | 0,640 | < 0.001 | 0,164 | 0,003 | - | - |
| LOcC_L(R)_4_1 |  | 200 | *mOccG, middle occipital gyrus* | -31, -89, 11 | 34, -86, 11 | 0,591 | < 0.001 | 0,210 | < 0.001 | 0,174 | < 0.001 |
| LOcC _L(R)_4_2 | 201 |  | *V5/MT+, area V5/MT+* | -46, -74, 3 | 48, -70, -1 | 0,512 | < 0.001 | 0,210 | < 0.001 | 0,197 | < 0.001 |
| LOcC _L(R)_4_2 |  | 202 | *V5/MT+, area V5/MT+* | -46, -74, 3 | 48, -70, -1 | 0,510 | < 0.001 | 0,210 | < 0.001 | - | - |
| LOcC _L(R)_4_3 | 203 |  | *OPC, occipital polar cortex* | -18, -99, 2 | 22, -97, 4 | 0,326 | < 0.001 | - | - | - | - |
| LOcC _L(R)_4_3 |  | 204 | *OPC, occipital polar cortex* | -18, -99, 2 | 22, -97, 4 | 0,593 | < 0.001 | - | - | - | - |
| LOcC_L(R)_4_4 | 205 |  | *iOccG, inferior occipital gyrus* | -30, -88, -12 | 32, -85, -12 | 0,388 | < 0.001 | 0,192 | < 0.001 | 0,161 | < 0.001 |
| LOcC_L(R)_4_4 |  | 206 | *iOccG, inferior occipital gyrus* | -30, -88, -12 | 32, -85, -12 | 0,562 | < 0.001 | - | - | 0,233 | < 0.001 |
| LOcC _L(R)_2_1 | 207 |  | *msOccG, medial superior occipital gyrus* | -11, -88, 31 | 16, -85, 34 | 0,573 | < 0.001 | - | - | - | - |
| LOcC _L(R)_2_1 |  | 208 | *msOccG, medial superior occipital gyrus* | -11, -88, 31 | 16, -85, 34 | 0,535 | < 0.001 | - | - | - | - |
| LOcC _L(R)_2_2 | 209 |  | *lsOccG, lateral superior occipital gyrus* | -22, -77, 36 | 29, -75, 36 | 0,563 | < 0.001 | - | - | - | - |
| LOcC _L(R)_2_2 |  | 210 | *lsOccG, lateral superior occipital gyrus* | -22, -77, 36 | 29, -75, 36 | 0,505 | < 0.001 | - | - | - | - |
| Subcortical Nuclei | Amyg, Amygdala | Amyg_L(R)_2_1 | 211 |  | *mAmyg, medial amygdala* | -19, -2, -20 | 19, -2, -19 | 0,251 | 0,001 | 0,224 | < 0.001 | - | - |
| Amyg_L(R)_2_1 |  | 212 | *mAmyg, medial amygdala* |  |  | 0,306 | < 0.001 | 0,256 | < 0.001 | - | - |
| Amyg_L(R)_2_2 | 213 |  | *lAmyg, lateral amygdala* | -27, -4, -20 | 28, -3, -20 | 0,278 | < 0.001 | 0,218 | < 0.001 | 0,140 | 0,001 |
| Amyg_L(R)_2_2 |  | 214 | *lAmyg, lateral amygdala* |  |  | 0,576 | < 0.001 | 0,197 | < 0.001 | - | - |

**ROI Comparaison : AFSD - VIFD**

Direct pairwise comparisons between datasets further indicated that AFSD showed significantly predictive accuracy than VIFD in 51 regions, with *r* differences ranging from 0.103 to 0.382 (FDR-corrected *p* < 0.05). The largest effect was observed in the right lateral amygdala (AUC difference = 0.382), followed by regions in the occipital and temporal cortices, including the left middle occipital gyrus (0.297), the left lateral superior occipital gyrus (0.284), and the right middle temporal gyrus (0.282).

Widespread differences were observed across frontal, occipital, temporal, parietal, limbic, and insular cortices. In the frontal lobe, AFSD outperformed VIFD in premotor and motor regions (precentral gyrus; areas A6cdl, A4ul, A4t), as well as in multiple prefrontal areas, including the middle frontal gyrus (A10l, A9/46v), inferior frontal gyrus (A44d, inferior frontal sulcus), inferior frontal junction, and superior frontal gyrus (A8dl), indicating stronger engagement of executive and motor-related processes.

Other differences were seen in the occipital cortex, spanning both lateral and medioventral visual regions. These included the middle, inferior, and lateral superior occipital gyri, the occipital pole, motion-sensitive area V5/MT+, as well as lingual and cuneus regions (rostral and caudal). Additional differences were observed in medial and ventromedial parieto-occipital sulcal regions (dmPOS, vmPOS), highlighting robust modulation across early and higher-order visual processing areas.

In the temporal lobe, AFSD showed higher decoding accuracy in the middle and inferior temporal gyri, the fusiform gyrus (bilaterally), and multiple subdivisions of the parahippocampal gyrus, pointing to stronger engagement of ventral and medial temporal structures. Differences were also present in parietal regions, including the inferior parietal lobule and the precuneus, as well as in limbic areas, notably the cingulate gyrus. Finally, significant effects in the insula further underscore the distributed nature of the networks differentiating AFSD from VIFD.

**ROI Comparaison : AFSD - CoFD**

Direct pairwise comparisons between datasets further indicated that AFSD showed significantly higher predictive accuracy than CoFD in 42 regions, with *r* differences ranging from 0.128 to 0.294 (FDR-corrected p < 0.05). The largest effects were observed in the occipital cortex, including the right medial superior occipital gyrus (AUC difference = 0.294), the right middle occipital gyrus (0.274), and the right rostral cuneus gyrus (0.271). Additional prominent differences were found in ventral temporal regions and the right lateral amygdala (0.194).

As in the AFSD–VIFD comparison, widespread differences were observed across frontal, occipital, temporal, parietal, and subcortical regions. In the frontal lobe, AFSD showed higher decoding accuracy than CoFD in prefrontal and premotor regions, including the inferior frontal junction, ventrolateral premotor cortex (A6vl), dorsolateral superior frontal gyrus (A8dl), and orbitofrontal cortex (area 13), suggesting enhanced involvement of executive control, motor planning, and valuation-related processes.

Differences were again particularly pronounced throughout the occipital cortex, encompassing both lateral and medioventral visual regions. These included medial, middle, inferior, and lateral superior occipital gyri, the occipital pole, motion-sensitive area V5/MT+, as well as lingual and cuneus regions (rostral and caudal). Effects extended into ventromedial and dorsomedial parieto-occipital sulcal regions (vmPOS, dmPOS), indicating robust modulation across visual and visuospatial processing hierarchies.

In the temporal lobe, AFSD outperformed CoFD in a broad set of ventral and lateral temporal regions, including the fusiform gyrus, inferior and middle temporal gyri, posterior superior temporal sulcus, and several parahippocampal subdivisions. The right lateral amygdala also showed higher predictive accuracy in AFSD. Additional differences were observed in parietal regions, including the inferior and superior parietal lobules and the precuneus.

No regions showed significantly better prediction for either VIFD or CoFD when compared with one another after multiple-comparison correction.

When performing pairwise comparisons of decoder performance between AFSD, VIFD and CoFD across all 214 brain regions, we found a systematic pattern: AFSD consistently showed higher predictive accuracy than both VIFD and CoFD, with significantly greater involvement of visual and associative regions, including the fusiform gyrus, lateral occipital cortex, and parahippocampal gyrus (see Figure 6). Critically, the VIFD and CoFD datasets did not differ significantly across any brain region after FDR correction. Notably, the AFSD–VIFD contrast was characterized by additional engagement of limbic and insular regions, whereas the AFSD–CoFD contrast showed a more pronounced occipito-temporal dominance, highlighting both shared and dataset-specific contributions to decoding performance.


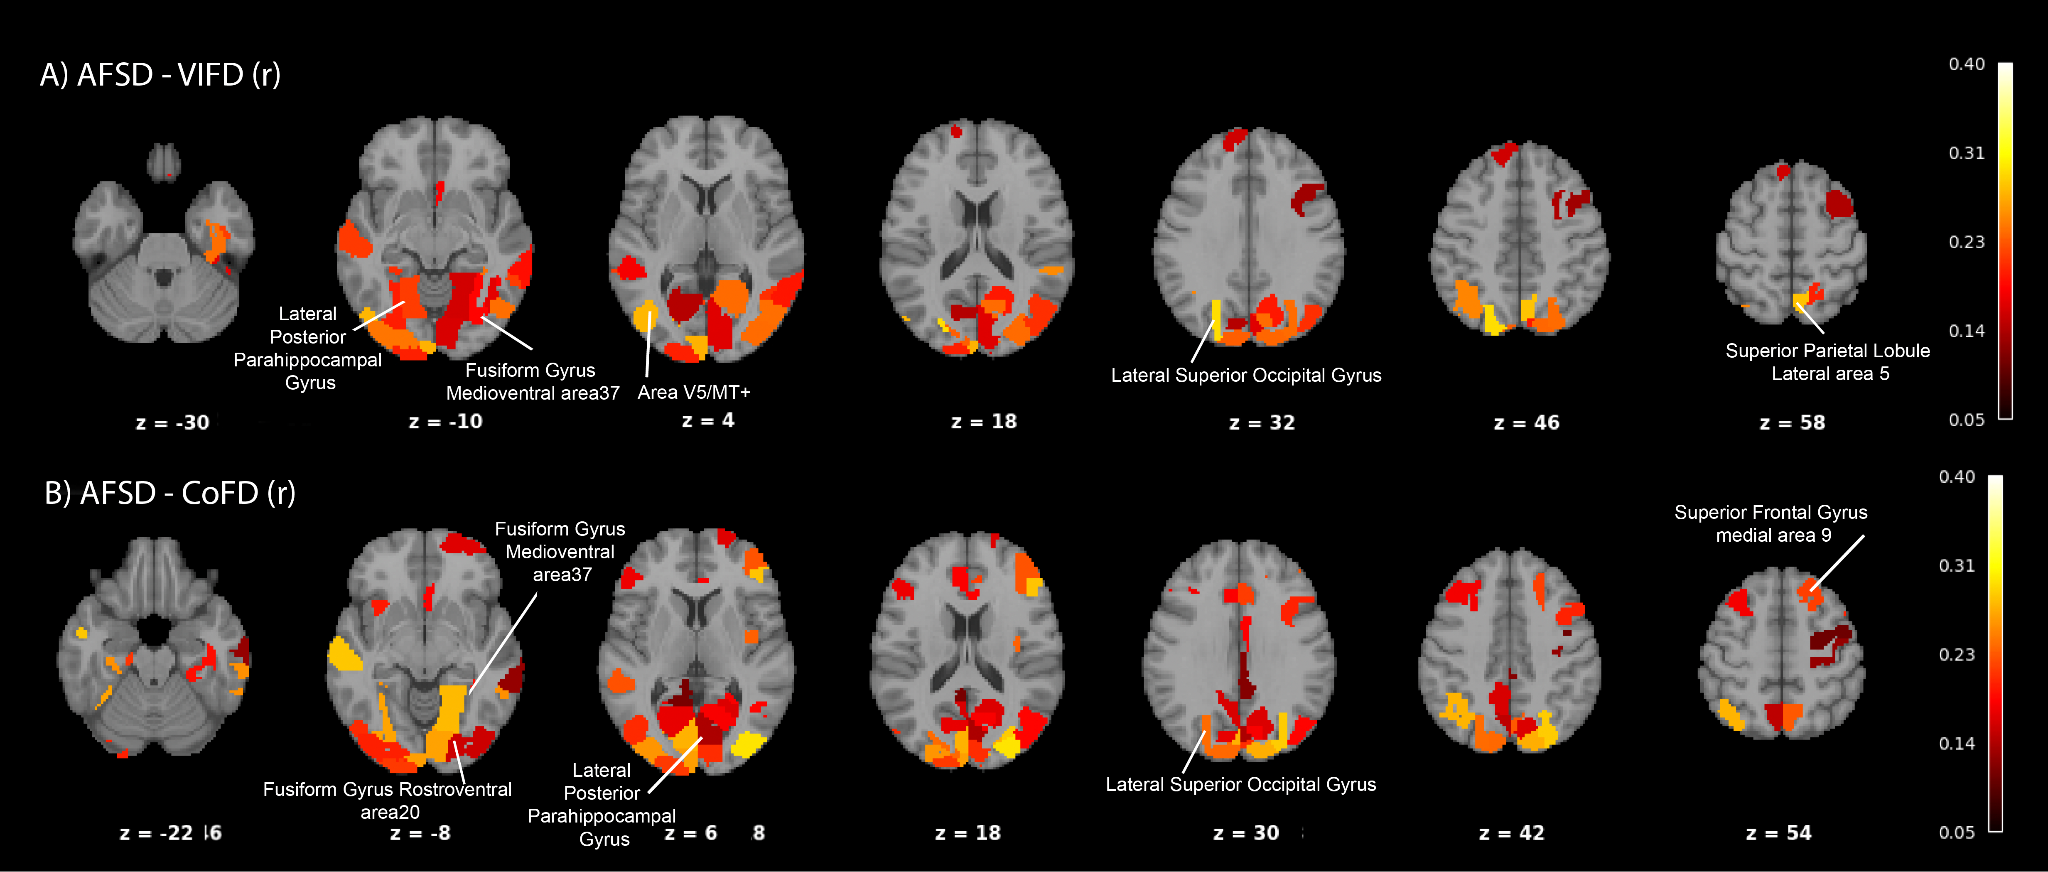


**Figure S6. AFSD engages more distributed neural representations than VIFD and CoFD.** Direct pairwise comparisons of decoding accuracy (Pearson r) between datasets across the Brainnetome Atlas. (A) Regions where AFSD showed significantly higher predictive accuracy than VIFD. (B) Regions where AFSD showed significantly higher accuracy than CoFD. The maps highlight the broader neural network supporting AFSD, with the largest r differences observed in visual association cortices (fusiform gyrus, lateral occipital cortex), memory-related regions (parahippocampal gyrus), and prefrontal areas. Selected regions of interest are labelled for illustration. No regions showed superior decoding for either VIFD or CoFD relative to AFSD, and no significant differences between VIFD and CoFD remained after FDR correction (p < 0.05).

**Table S6. ROI Correlation for Pairwise Datasets**

| **Lobe** | **Gyrus** | **Left and Right Hemisphere** | **Label ID.L** | **Label ID.R** | **Anatomical and modified Cyto-architectonic descriptions** | **lh.MNI(X,Y,Z)** | **rh.MNI(X,Y,Z)** | **AFSD - VIFD**  **(n = 62)** | | **AFSD - CoFD**  **(n = 62)** | | **VIFD - CoFD**  **(n = 134)** | |
| --- | --- | --- | --- | --- | --- | --- | --- | --- | --- | --- | --- | --- | --- |
| **r** | **p** | **r** | **p** | **r** | **p** |
| Frontal Lobe | SFG, Superior Frontal Gyrus | SFG_L(R)_7_2 | 3 |  | *A8dl, dorsolateral area 8* | -18, 24, 53 | 22, 26, 51 |  |  | 3,421 | 0,001 |  |  |
| SFG_L(R)_7_2 |  | 4 | *A8dl, dorsolateral area 8* |  |  | 3,333 | 0,001 |  |  |  |  |
| MFG, Middle Frontal Gyrus | MFG_L(R)_7_2 | 17 |  | *IFJ, inferior frontal junction* | -42, 13, 36 | 42, 11, 39 | 3,486 | < 0.001 | 3,409 | 0,001 |  |  |
| MFG_L(R)_7_4 | 21 |  | *A9/46v, ventral area 9/46* | -41, 41, 16 | 42, 44, 14 |  |  | 4,128 | < 0.001 |  |  |
| MFG_L(R)_7_4 |  | 22 | *A9/46v, ventral area 9/46* | -41, 41, 16 | 42, 44, 14 |  |  | 3,345 | 0,001 |  |  |
| MFG_L(R)_7_6 | 25 |  | *A6vl, ventrolateral area 6* | -32, 4, 55 | 34, 8, 54 | 3,385 | 0,001 |  |  |  |  |
| MFG_L(R)_7_7 | 27 |  | *A10l, lateral area10* | -26, 60, -6 | 25, 61, -4 |  |  | 3,848 | < 0.001 |  |  |
| IFG, Inferior Frontal Gyrus | IFG_L(R)_6_1 |  | 30 | *A44d,dorsal area 44* | -46, 13, 24 | 45, 16, 25 |  |  | 3,389 | 0,001 |  |  |
| IFG_L(R)_6_2 | 31 |  | *IFS, inferior frontal sulcus* | -47, 32, 14 | 48, 35, 13 |  |  | 4,372 | < 0.001 |  |  |
| OrG, Orbital Gyrus | OrG_L(R)_6_5 | 49 |  | *A13, area 13* | -10, 18, -19 | 9, 20, -19 | 3,437 | 0,001 |  |  |  |  |
| PrG, Precentral Gyrus | PrG_L(R)_6_2 | 55 |  | *A6cdl, caudal dorsolateral area 6* | -32, -9, 58 | 33, -7, 57 |  |  | 3,467 | 0,001 |  |  |
| PrG_L(R)_6_3 | 57 |  | *A4ul, area 4(upper limb region)* | -26, -25, 63 | 34, -19, 59 |  |  | 3,687 | < 0.001 |  |  |
| PrG_L(R)_6_4 | 59 |  | *A4t, area 4(trunk region)* | -13, -20, 73 | 15, -22, 71 |  |  | 3,751 | < 0.001 |  |  |
| Temporal Lobe | MTG, Middle Temporal Gyrus | MTG_L(R)_4_1 | 81 |  | *A21c, caudal area 21* | -65, -30, -12 | 65, -29, -13 | 3,848 | < 0.001 | 3,196 | 0,001 |  |  |
| MTG_L(R)_4_3 | 85 |  | *A37dl, dorsolateral area37* | -59, -58, 4 | 60, -53, 3 | 4,297 | < 0.001 |  |  |  |  |
| MTG_L(R)_4_3 |  | 86 | *A37dl, dorsolateral area37* | -59, -58, 4 | 60, -53, 3 | 3,170 | 0,002 | 3,879 | < 0.001 |  |  |
| ITG, Inferior Temporal Gyrus | ITG_L(R)_7_1 | 89 |  | *A20iv, intermediate ventral area 20* | -45, -26, -27 | 46, -14, -33 | 3,414 | 0,001 |  |  |  |  |
| ITG_L(R)_7_2 | 91 |  | *A37elv, extreme lateroventral area37* | -51, -57, -15 | 53, -52, -18 | 4,054 | < 0.001 |  |  |  |  |
| ITG_L(R)_7_6 | 99 |  | *A20cl, caudolateral of area 20* | -59, -42, -16 | 61, -40, -17 | 3,627 | < 0.001 | 3,701 | < 0.001 |  |  |
| FuG, Fusiform Gyrus | FuG_L(R)_3_1 | 103 |  | *A20rv, rostroventral area 20* | -33, -16, -32 | 33, -15, -34 | 5,281 | < 0.001 | 3,923 | < 0.001 |  |  |
| FuG_L(R)_3_1 |  | 104 | *A20rv, rostroventral area 20* | -33, -16, -32 | 33, -15, -34 | 4,233 | < 0.001 | 3,916 | < 0.001 |  |  |
| FuG_L(R)_3_2 | 105 |  | *A37mv, medioventral area37* | -31, -64, -14 | 31, -62, -14 | 4,161 | < 0.001 |  |  |  |  |
| FuG_L(R)_3_3 | 107 |  | *A37lv, lateroventral area37* | -42, -51, -17 | 43, -49, -19 | 3,728 | < 0.001 |  |  |  |  |
| PhG, Parahippocampal Gyrus | PhG_L(R)_6_2 |  | 112 | *A35/36c, caudal area 35/36* | -25, -25, -26 | 26, -23, -27 | 5,040 | < 0.001 | 5,593 | < 0.001 |  |  |
| PhG_L(R)_6_3 | 113 |  | *TL, area TL (lateral PPHC, posterior parahippocampal gyrus)* | -28, -32, -18 | 30, -30, -18 | 3,512 | < 0.001 |  |  |  |  |
| PhG_L(R)_6_3 |  | 114 | *TL, area TL (lateral PPHC, posterior parahippocampal gyrus)* | -28, -32, -18 | 30, -30, -18 |  |  | 3,428 | 0,001 |  |  |
| PhG_L(R)_6_6 |  | 120 | *TH, area TH (medial PPHC)* | -17, -39, -10 | 19, -36, -11 | 3,472 | 0,001 | 3,742 | < 0.001 |  |  |
| pSTS, posterior Superior Temporal Sulcus | pSTS_L(R)_2_2 | 123 |  | *cpSTS, caudoposterior superior temporal sulcus* | -52, -50, 11 | 57, -40, 12 | 4,933 | < 0.001 |  |  |  |  |
| Parietal Lobe | SPL, Superior Parietal Lobule | SPL_L(R)_5_1 | 125 |  | *A7r, rostral area 7* | -16, -60, 63 | 19, -57, 65 | 3,707 | < 0.001 |  |  |  |  |
| IPL, Inferior Parietal Lobule | IPL_L(R)_6_1 | 135 |  | *A39c, caudal area 39(PGp)* | -34, -80, 29 | 45, -71, 20 | 5,088 | < 0.001 | 3,672 | < 0.001 |  |  |
| IPL_L(R)_6_1 |  | 136 | *A39c, caudal area 39(PGp)* | -34, -80, 29 | 45, -71, 20 | 4,157 | < 0.001 | 4,691 | < 0.001 |  |  |
| IPL_L(R)_6_6 |  | 146 | *A40rv, rostroventral area 40(PFop)* | -53, -31, 23 | 55, -26, 26 |  |  | 3,118 | 0,002 |  |  |
| Pcun, Precuneus | PCun_L(R)_4_1 | 147 |  | *A7m, medial area 7(PEp)* | -5, -63, 51 | 6, -65, 51 | 5,527 | < 0.001 | 3,607 | < 0.001 |  |  |
| PCun_L(R)_4_3 | 151 |  | *dmPOS, dorsomedial parietooccipital sulcus(PEr)* | -12, -67, 25 | 16, -64, 25 | 3,646 | < 0.001 | 3,160 | 0,002 |  |  |
| PCun_L(R)_4_3 |  | 152 | *dmPOS, dorsomedial parietooccipital sulcus(PEr)* | -12, -67, 25 | 16, -64, 25 |  |  | 3,899 | < 0.001 |  |  |
| Insular Lobe | INS, Insular Gyrus | INS_L(R)_6_1 |  | 164 | *G, hypergranular insula* | -36, -20, 10 | 37, -18, 8 |  |  | 3,217 | 0,001 |  |  |
| INS_L(R)_6_5 | 171 |  | *dIg, dorsal granular insula* | -38, -8, 8 | 39, -7, 8 |  |  | 3,278 | 0,001 |  |  |
| Limbic Lobe | CG, Cingulate Gyrus | CG_L(R)_7_1 | 175 |  | *A23d, dorsal area 23* | -4, -39, 31 | 4, -37, 32 |  |  | 3,489 | < 0.001 |  |  |
| CG_L(R)_7_2 | 177 |  | *A24rv, rostroventral area 24* | -3, 8, 25 | 5, 22, 12 |  |  | 3,700 | < 0.001 |  |  |
| CG_L(R)_7_2 |  | 178 | *A24rv, rostroventral area 24* | -3, 8, 25 | 5, 22, 12 |  |  | 3,914 | < 0.001 |  |  |
| CG_L(R)_7_3 | 179 |  | *A32p, pregenual area 32* | -6, 34, 21 | 5, 28, 27 |  |  | 3,664 | < 0.001 |  |  |
| CG_L(R)_7_3 |  | 180 | *A32p, pregenual area 32* | -6, 34, 21 | 5, 28, 27 |  |  | 3,825 | < 0.001 |  |  |
| Occipital Lobe | MVOcC*,* MedioVentral Occipital Cortex | MVOcC _L(R)_5_1 | 189 |  | *cLinG, caudal lingual gyrus* | -11, -82, -11 | 10, -85, -9 | 3,505 | < 0.001 | 3,833 | < 0.001 |  |  |
| MVOcC _L(R)_5_1 |  | 190 | *cLinG, caudal lingual gyrus* | -11, -82, -11 | 10, -85, -9 |  |  | 3,793 | < 0.001 |  |  |
| MVOcC _L(R)_5_2 | 191 |  | *rCunG, rostral cuneus gyrus* | -5, -81, 10 | 7, -76, 11 | 3,362 | 0,001 | 3,209 | 0,001 |  |  |
| MVOcC _L(R)_5_2 |  | 192 | *rCunG, rostral cuneus gyrus* | -5, -81, 10 | 7, -76, 11 | 4,907 | < 0.001 | 4,231 | < 0.001 |  |  |
| MVOcC _L(R)_5_3 | 193 |  | *cCunG, caudal cuneus gyrus* | -6, -94, 1 | 8, -90, 12 | 4,029 | < 0.001 | 4,199 | < 0.001 |  |  |
| MVOcC _L(R)_5_3 |  | 194 | *cCunG, caudal cuneus gyrus* | -6, -94, 1 | 8, -90, 12 | 3,936 | < 0.001 |  |  |  |  |
| MVOcC _L(R)_5_4 | 195 |  | *rLinG, rostral lingual gyrus* | -17, -60, -6 | 18, -60, -7 | 3,669 | < 0.001 | 5,113 | < 0.001 |  |  |
| MVOcC _L(R)_5_4 |  | 196 | *rLinG, rostral lingual gyrus* | -17, -60, -6 | 18, -60, -7 | 3,480 | 0,001 | 3,651 | < 0.001 |  |  |
| MVOcC _L(R)_5_5 | 197 |  | *vmPOS,ventromedial parietooccipital sulcus* | -13, -68, 12 | 15, -63, 12 | 4,914 | < 0.001 | 3,847 | < 0.001 |  |  |
| MVOcC _L(R)_5_5 |  | 198 | *vmPOS,ventromedial parietooccipital sulcus* | -13, -68, 12 | 15, -63, 12 |  |  | 4,252 | < 0.001 |  |  |
| LOcC, lateral Occipital Cortex | LOcC_L(R)_4_1 | 199 |  | *mOccG, middle occipital gyrus* | -31, -89, 11 | 34, -86, 11 | 5,385 | < 0.001 | 6,351 | < 0.001 |  |  |
| LOcC_L(R)_4_1 |  | 200 | *mOccG, middle occipital gyrus* | -31, -89, 11 | 34, -86, 11 | 4,964 | < 0.001 | 3,986 | < 0.001 |  |  |
| LOcC _L(R)_4_2 | 201 |  | *V5/MT+, area V5/MT+* | -46, -74, 3 | 48, -70, -1 | 3,392 | 0,001 |  |  |  |  |
| LOcC _L(R)_4_2 |  | 202 | *V5/MT+, area V5/MT+* | -46, -74, 3 | 48, -70, -1 | 3,703 | < 0.001 | 4,143 | < 0.001 |  |  |
| LOcC _L(R)_4_3 |  | 204 | *OPC, occipital polar cortex* | -18, -99, 2 | 22, -97, 4 | 5,174 | < 0.001 | 4,128 | < 0.001 |  |  |
| LOcC_L(R)_4_4 | 205 |  | *iOccG, inferior occipital gyrus* | -30, -88, -12 | 32, -85, -12 |  |  | 3,864 | < 0.001 |  |  |
| LOcC_L(R)_4_4 |  | 206 | *iOccG, inferior occipital gyrus* | -30, -88, -12 | 32, -85, -12 | 4,651 | < 0.001 | 4,555 | < 0.001 |  |  |
| LOcC _L(R)_2_1 | 207 |  | *msOccG, medial superior occipital gyrus* | -11, -88, 31 | 16, -85, 34 | 5,495 | < 0.001 | 5,510 | < 0.001 |  |  |
| LOcC _L(R)_2_1 |  | 208 | *msOccG, medial superior occipital gyrus* | -11, -88, 31 | 16, -85, 34 | 4,826 | < 0.001 | 3,391 | 0,001 |  |  |
| LOcC _L(R)_2_2 | 209 |  | *lsOccG, lateral superior occipital gyrus* | -22, -77, 36 | 29, -75, 36 | 4,822 | < 0.001 | 4,621 | < 0.001 |  |  |
| LOcC _L(R)_2_2 |  | 210 | *lsOccG, lateral superior occipital gyrus* | -22, -77, 36 | 29, -75, 36 | 4,032 | < 0.001 | 4,047 | < 0.001 |  |  |
| Subcortical Nuclei | Amyg, Amygdala | Amyg_L(R)_2_2 |  | 214 | *lAmyg, lateral amygdala* | 4,150 | < 0.001 |  |  | 6,549 | < 0.001 |  |  |
