# Supplementary material
Source: Research Square preprint supplement (doi:10.21203/rs.3.rs-9456965/v1)

RDM for AFSD

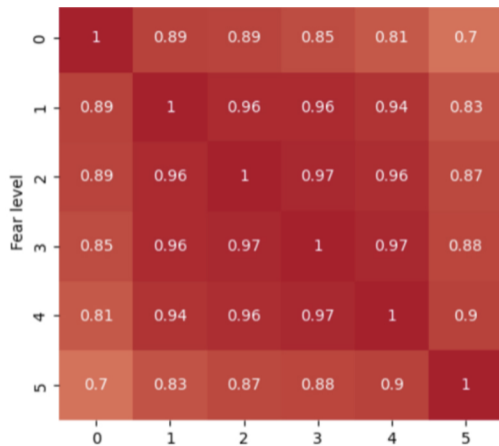

RDM for VIFD

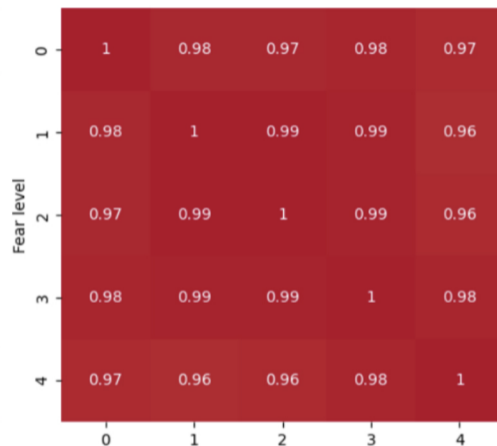

RDM for CoFD

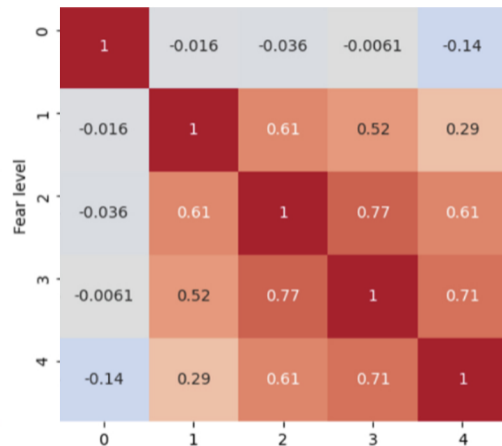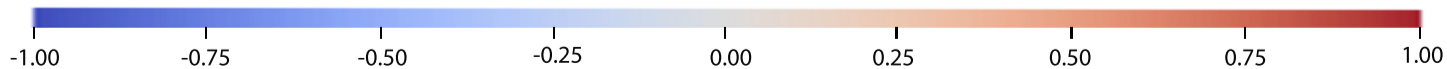

Supplement: Supplementary file 1 [file 007c4554d53713fc089603e1.pdf]

A) AFSD - VIFD (r)

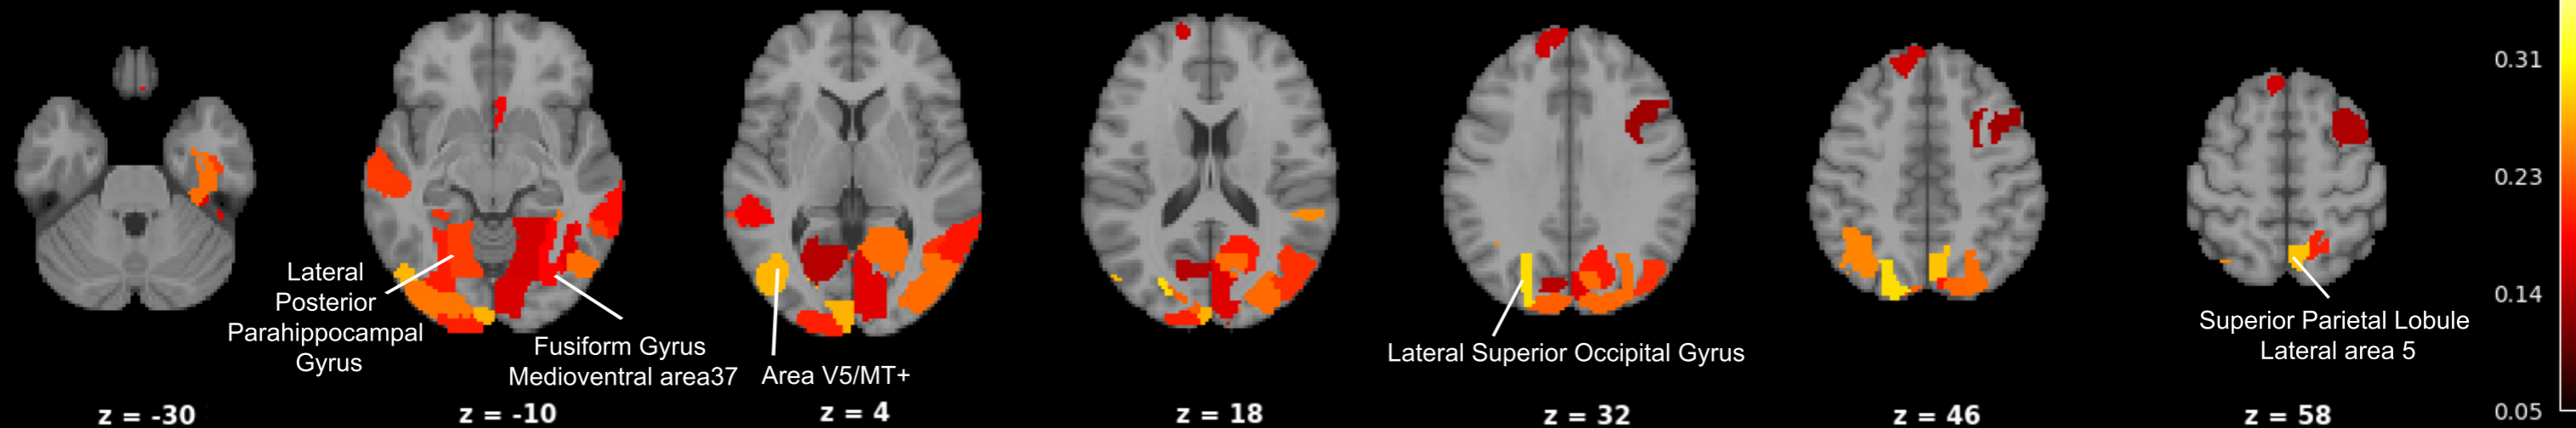

B) AFSD - CoFD (r)

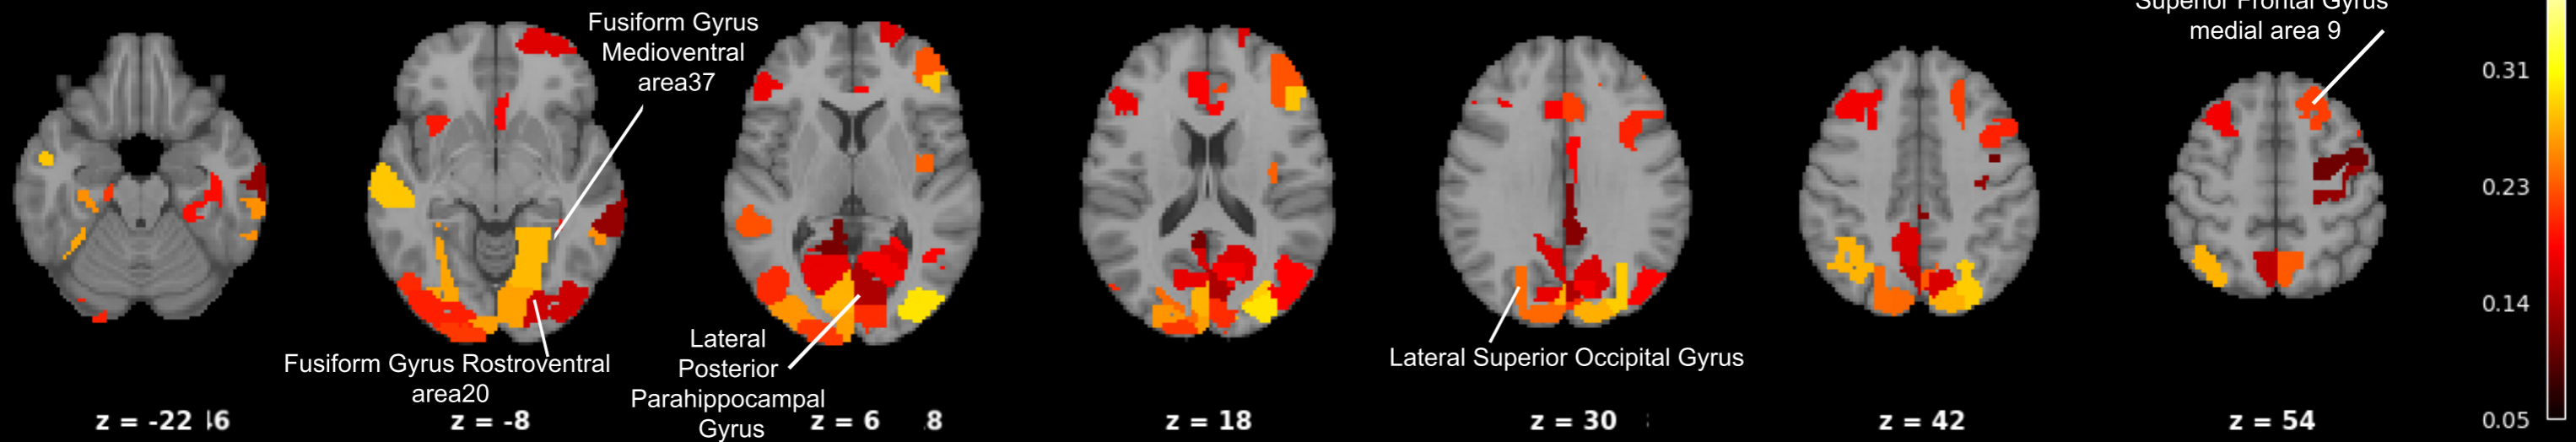

Supplement: Supplementary file 2 [file 0f9704358e80ca00014d2c7d.pdf]

**AFSD r map**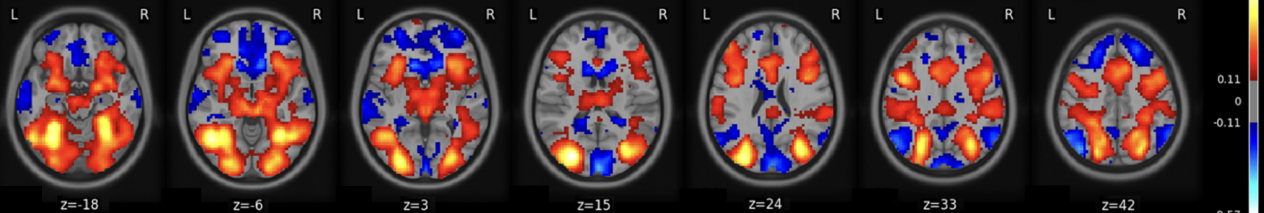**VIFD r map**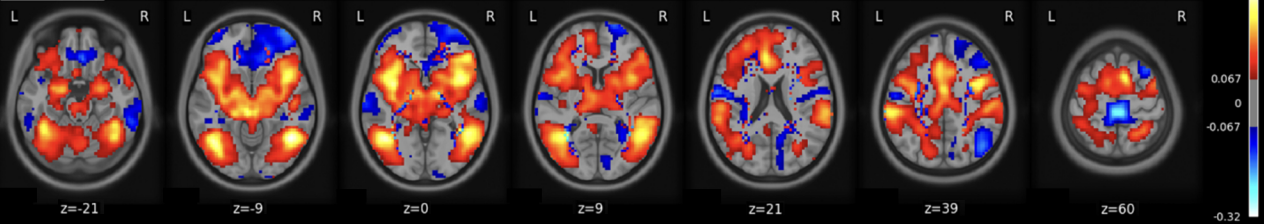**CoFD r map**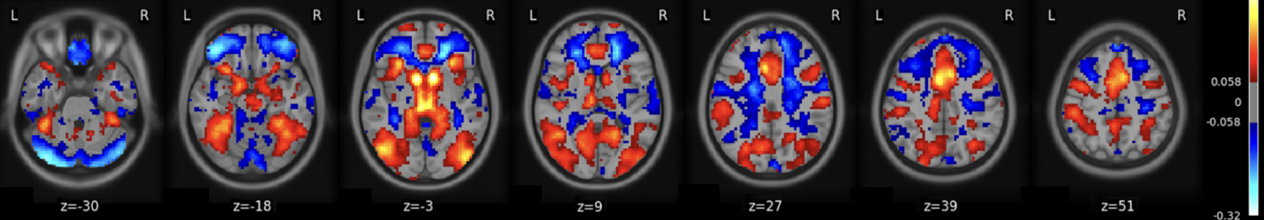

Supplement: Supplementary file 3 [file 16237eed0bc370d6531ef53e.pdf]

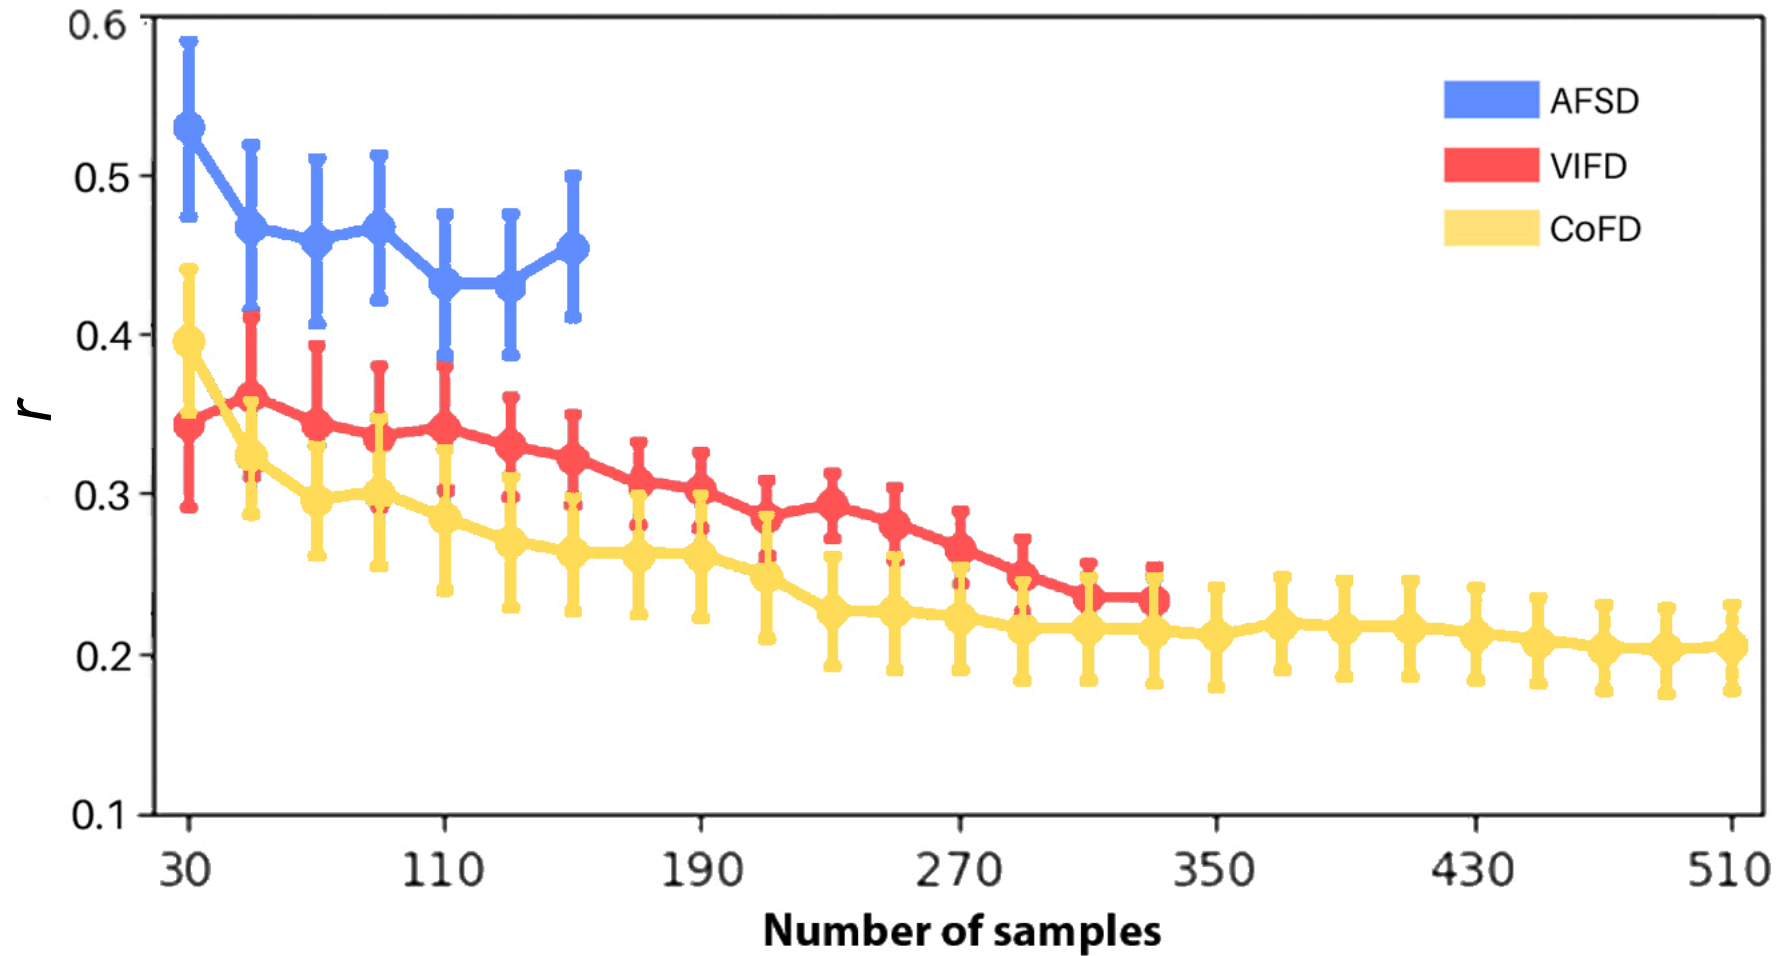

Supplement: Supplementary file 4 [file 4dbe45e74f585931f857a182.pdf]

Top 2% of R values by ROI  
(Normalized by max R value)

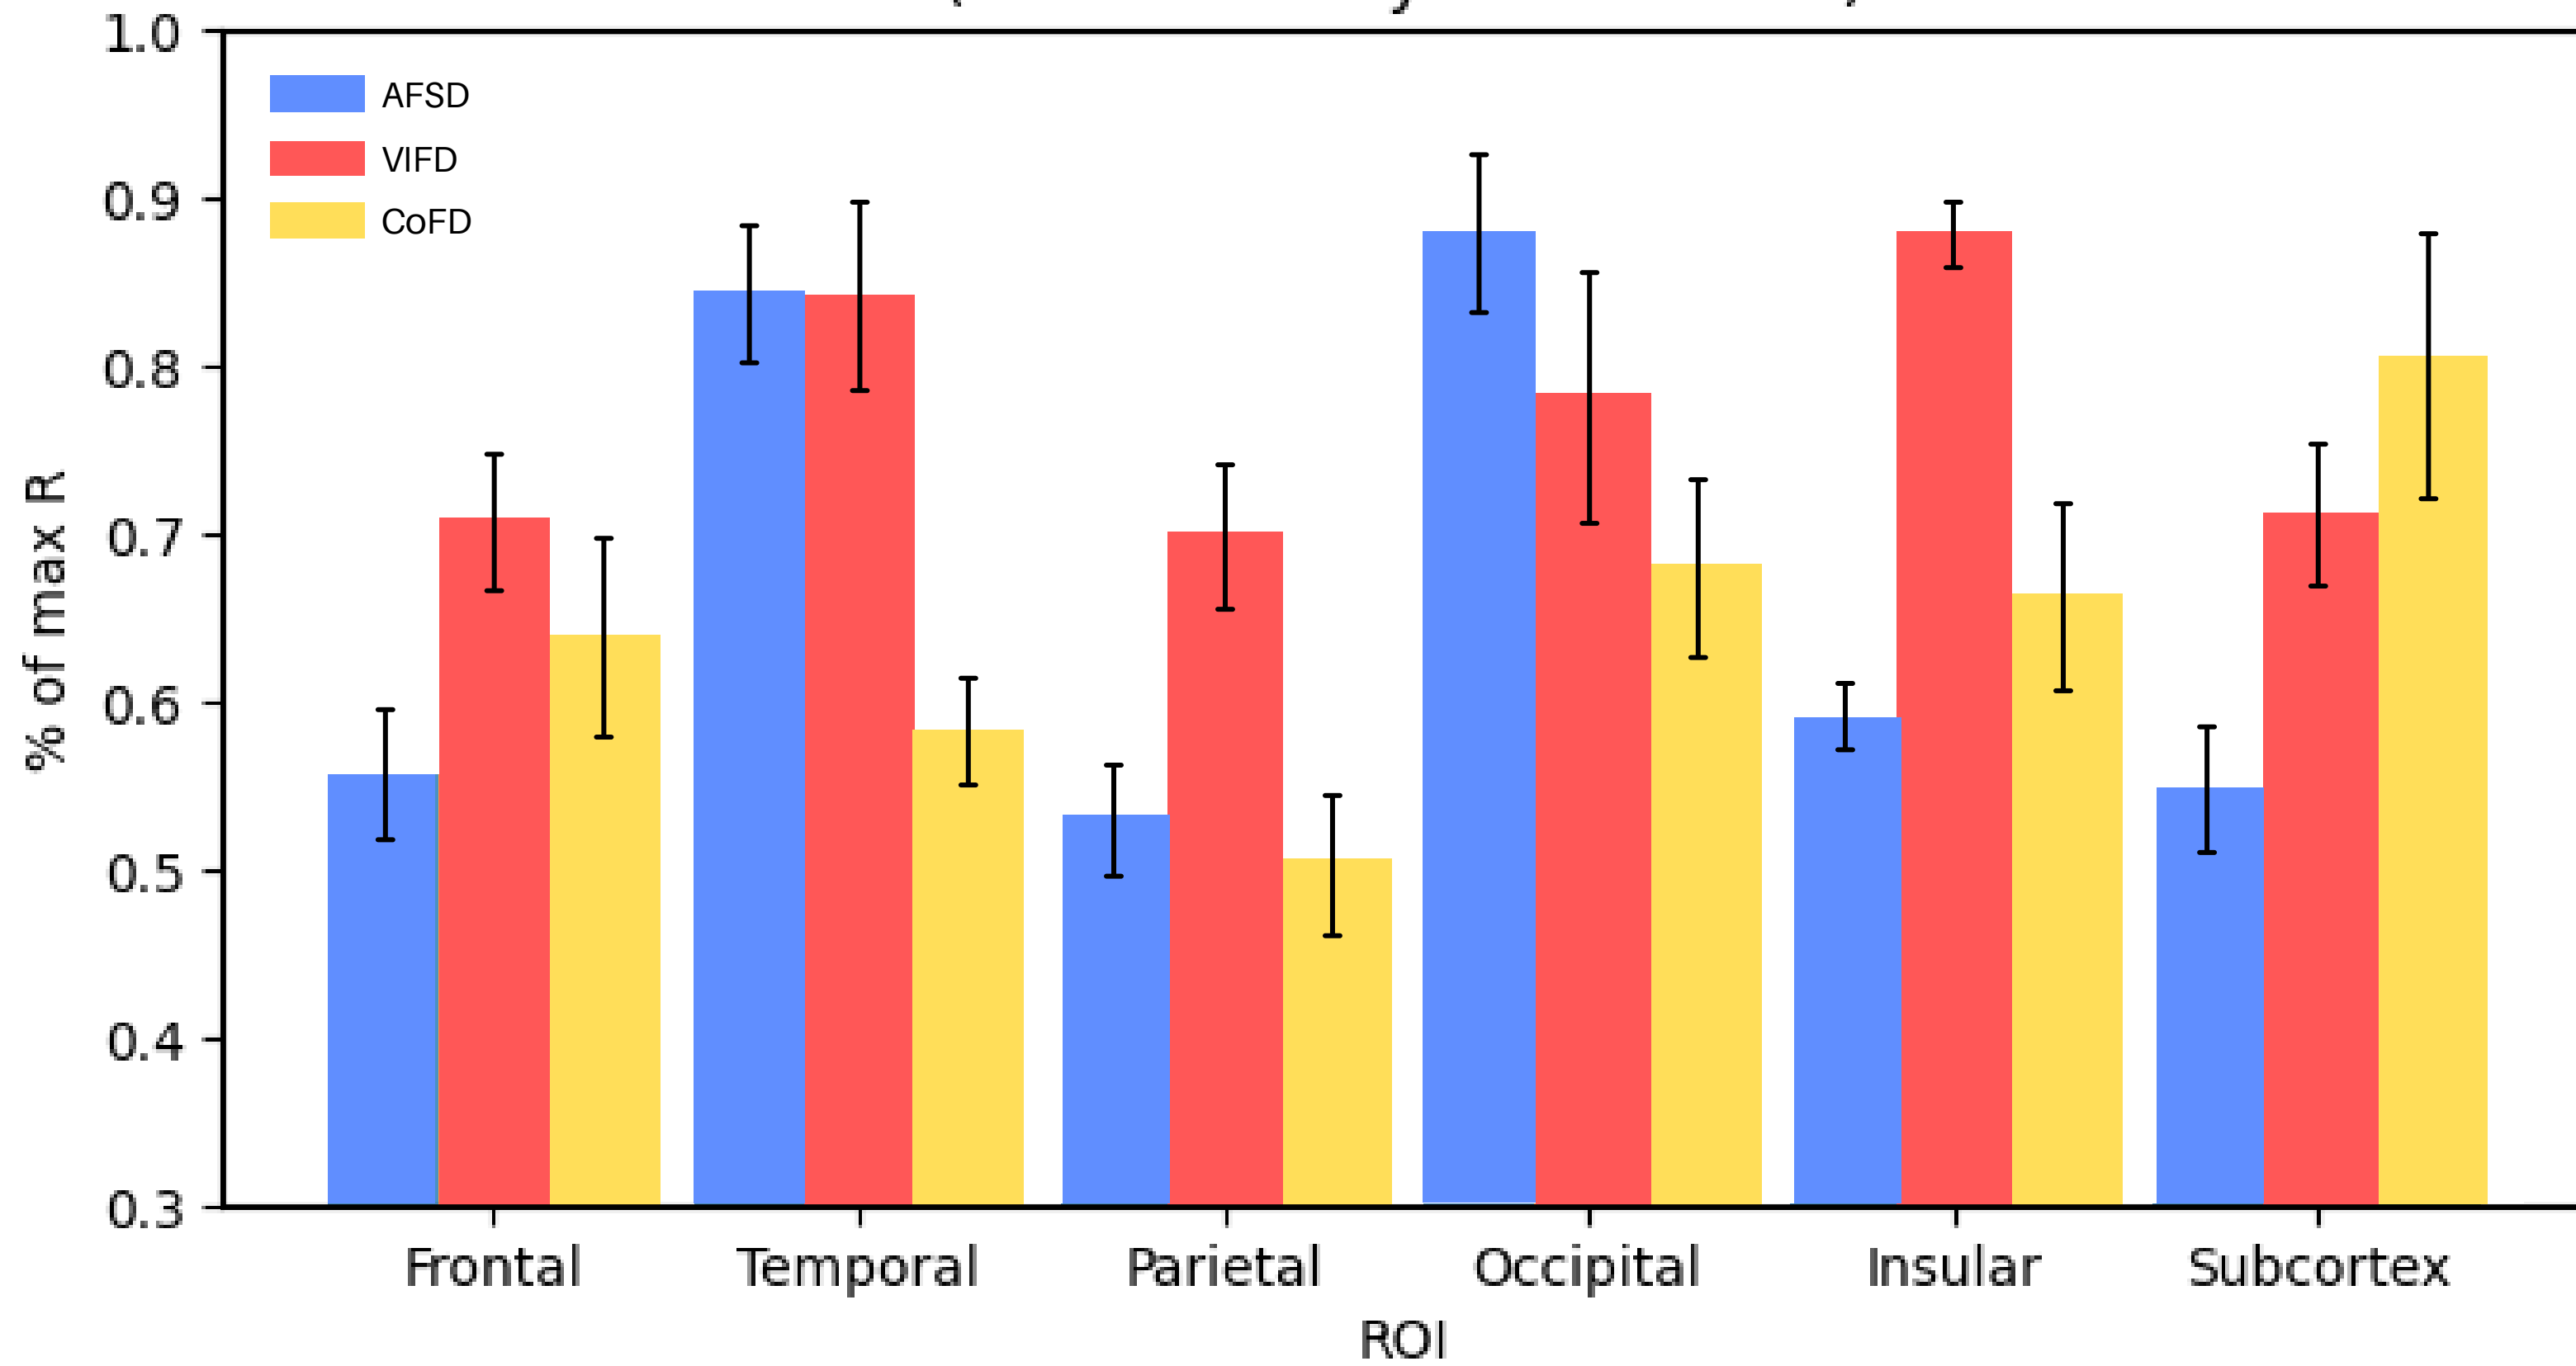

Supplement: Supplementary file 6 [file e6f312a7a200934ebd814081.pdf]

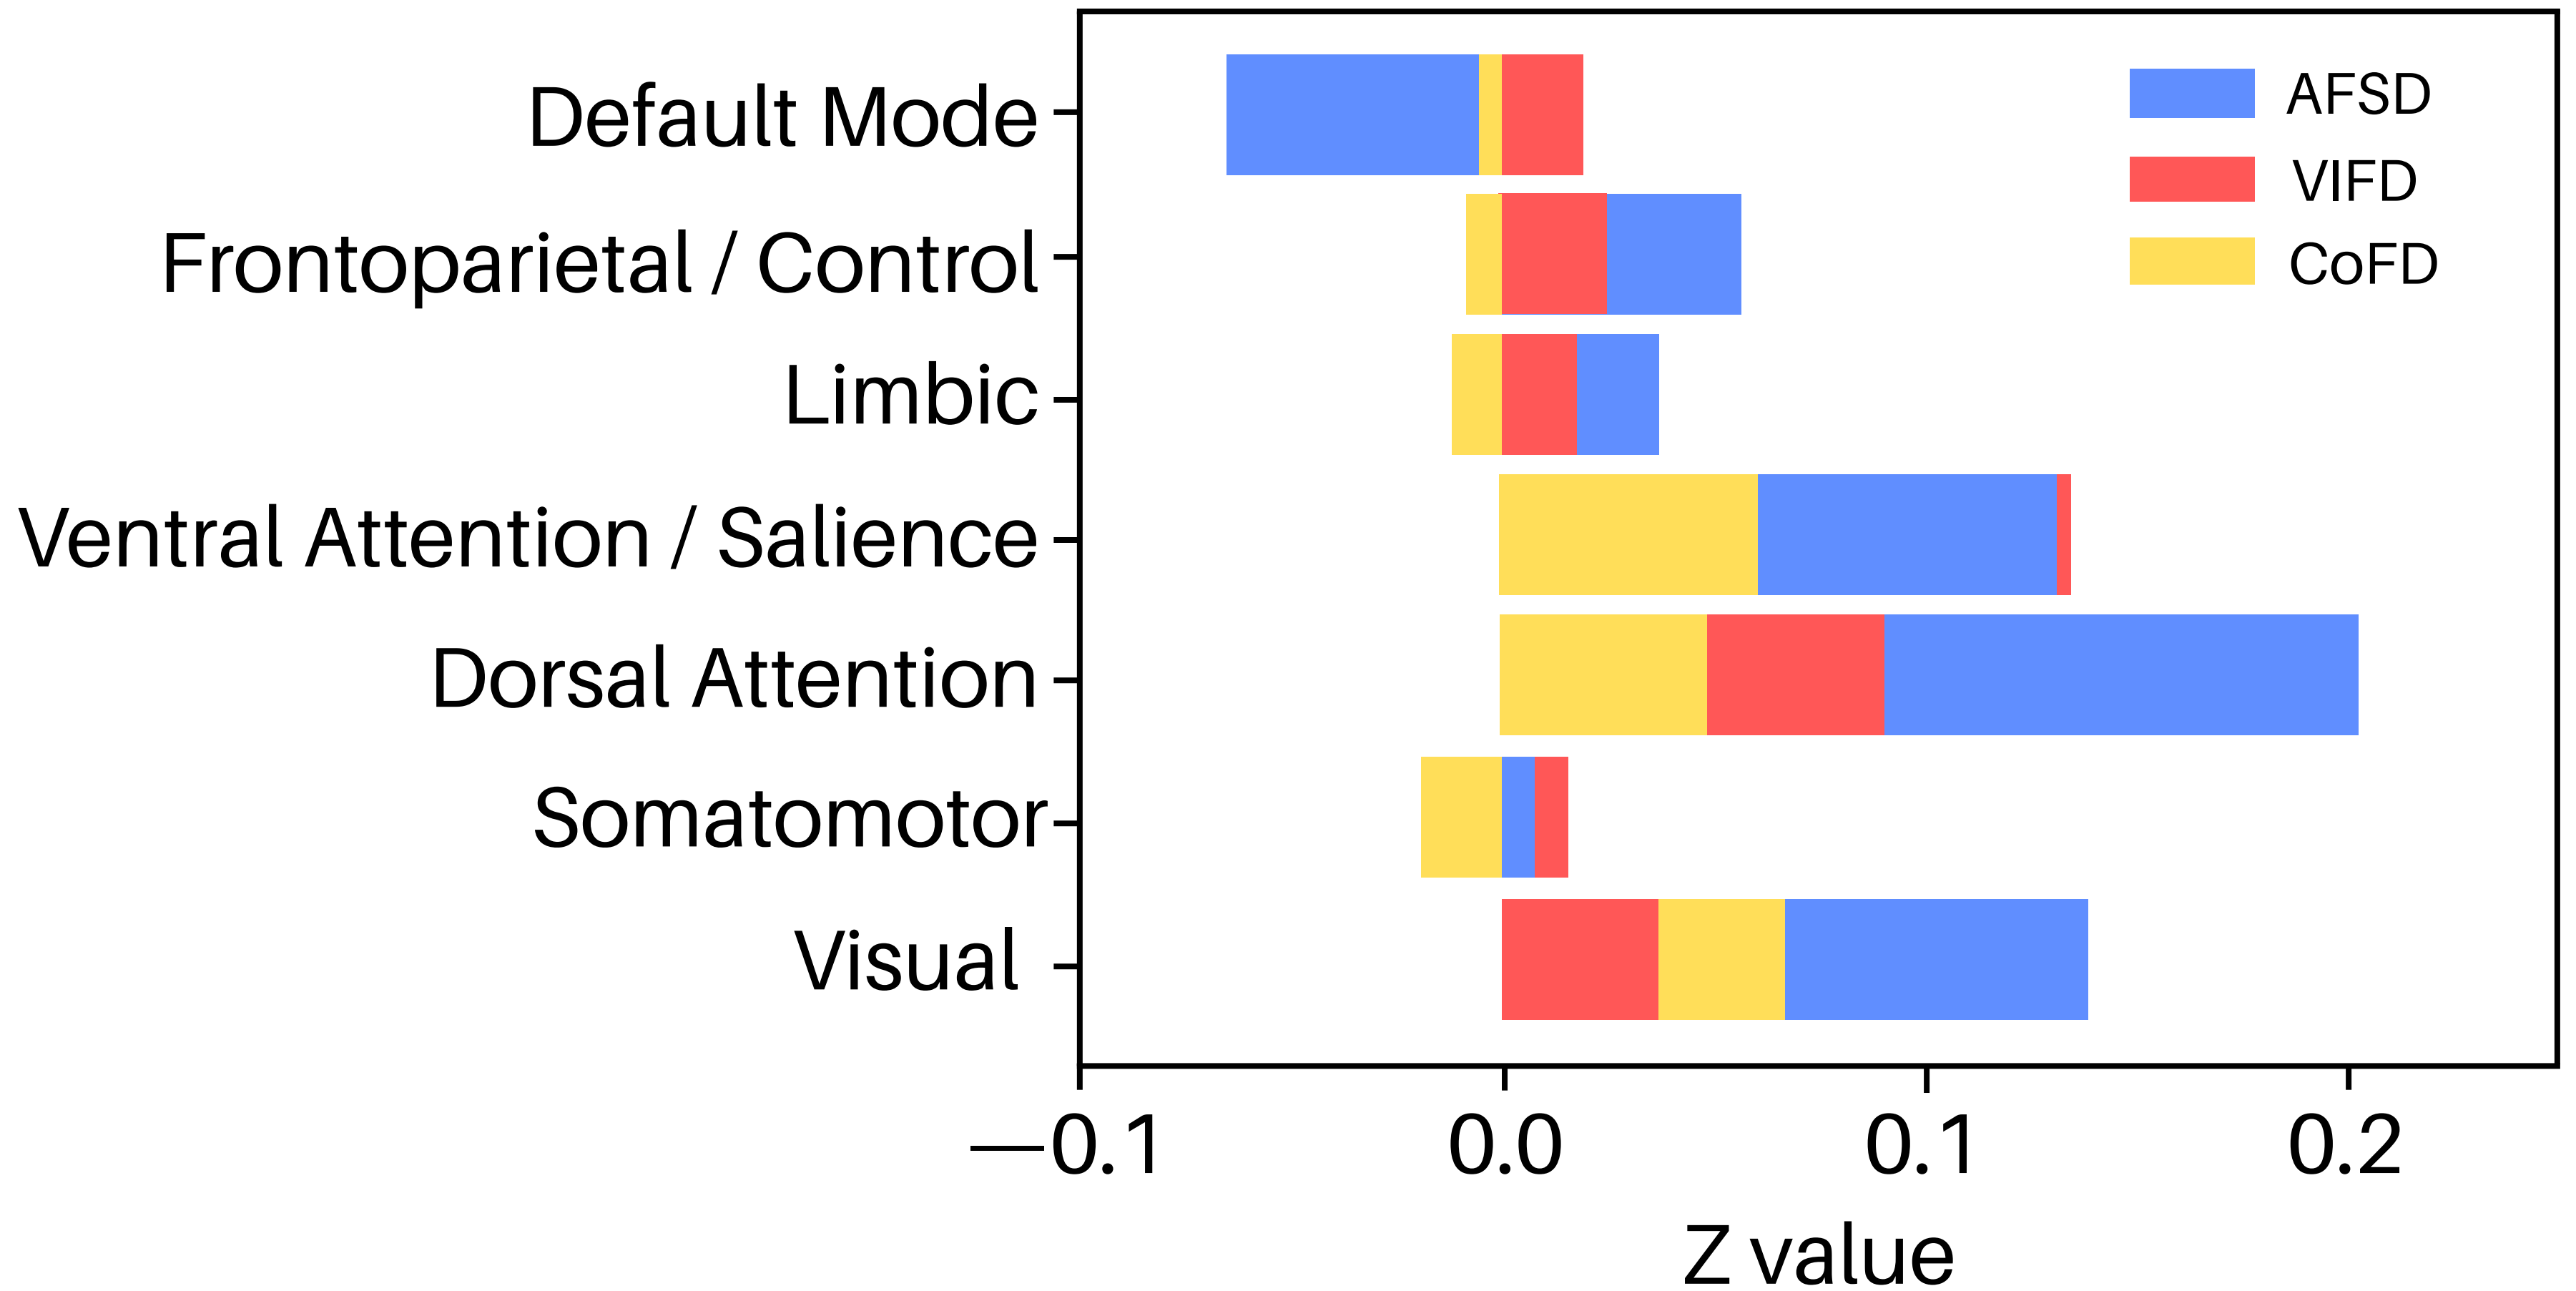

Supplement: Supplementary file 7 [file fedd0a6ee4e8baa50dcd76ab.pdf]
